# Supplementary material for: Novel Insights into Epigenetic Regulation of IL6 Pathway: In Silico Perspective on Inflammation and Cancer Relationship
Source: Int J Mol Sci. 2021 Sep 21;22(18):10172. doi: 10.3390/ijms221810172 (PMC8470126; doi:10.3390/ijms221810172)
Supplement: Supplementary file 1 [file ijms-22-10172-s001.zip › Supplementary tables.xlsx]

## Sheet: List of supplementary tables
Suppplementary Tables
Table S1. Differential expression analysis and survival analysis according to the relative abundant of IL6R Exon 9 and absolute expression levels of Exon 2 and 9
Table S2. Correlation analysis between IL6 expression and CG probesets methylation within IL6 locus
Table S3. Correlation analysis between IL6R expression and CG probesets methylation within IL6R locus
Table S4. Correlation analysis between IL6ST expression and CG probesets methylation within IL6ST locus
Table S5. Correlation analysis between IL6 gene expression and expression levels of miRNAs related to IL6 (mirDIP tool) in all TCGA tumors
Table S6. Correlation analysis between IL6R gene expression and expression levels of miRNAs related to IL6R (mirDIP tool) in all TCGA tumors
Table S7. Correlation analysis between IL6ST gene expression and expression levels of miRNAs related to IL6ST (mirDIP tool) in all TCGA tumors
Table S8. Correlation analysis between IL6R Exon 2 expression and expression levels of all miRNAs included in TCGA datasets
Table S9. Correlation analysis between IL6R Exon 9 expression and expression levels of all miRNAs included in TCGA datasets
Table S10. OS an PFI analysis of selected miRNAs involved in the IL6 pathway regulation.

## Sheet: Table S1
Table S1. Differential expression analysis and survival analysis (OS and PFI) according to the relative abundant of IL6R Exon 9 (columns B-D) and absolute expression levels of Exon 2 (columns E and F) and Exon 9 (columns G and H)
Tumor Type	Relative abundant of Exon9			IL6R Exon 2		IL6R Exon 9
	Fold Change (FC)*	OS (log rank)§	PFI (log rank)§	OS (log rank)ⴕ	PFI (Long rank)ⴕ	OS (log rank)ⴕ	PFI (Long rank)ⴕ
Acute Myeloid Leukemia (LAML)	2.53341				NA	5.123(unfavorable)	NA
Adrenocortical Cancer (ACC)	1.46263
Bile Duct Cancer (CHOL)	1.57774
Bladder Cancer (BLCA)
Breast Cancer (BRCA)	1.48036
Cervical Cancer (CESC)
Colon Cancer (COAD)
Endometrioid Cancer (UCEC)
Esophageal Cancer (ESCA)
Glioblastoma (GBM)	1.48805
Head and Neck Cancer (HNSC)	1.45455
Kidney Chromophobe (KICH)
Kidney Clear Cell Carcinoma (KIRC)	1.80793			19.53 (favorabe)	20.16 (favorable)	17.90 (favorable)	13.93 (favorable)
Kidney Papillary Cell Carcinoma (KIRP)	1.41961
Large B-cell Lymphoma (DLBC)
Liver Cancer (LIHC)	1.576
Lower Grade Glioma (LGG)	1.40072		4.31 (unfavorable)	8.98 (unfavorable)		5.95 (unfavorable)	5.28 (unfavorable)
Lung Adenocarcinoma (LUAD)	1.66583	3.97 (favorable)		4.15 (favorable)		7.15 (fav/unfavorable)
Lung Squamous Cell Carcinoma (LUSC)	1.53436				5.27 (unfavorable)
Melanoma (SKCM)	1.53746
Mesothelioma (MESO)					7.71 (favorable)
Ocular melanomas (UVM)			3.92 (favorable)
Ovarian Cancer (OV)	1.76473
Pancreatic Cancer (PAAD)	1.42586
Pheochromocytoma & Paraganglioma (PCPG)
Prostate Cancer (PRAD)
Rectal Cancer (READ)
Sarcoma (SARC)	1.50908			4.28 (favorable)
Stomach Cancer (STAD)	1.51653
Testicular Cancer (TGCT)	1.69555
Thymoma (THYM)	1.43476
Thyroid Cancer (THCA)
Uterine Carcinosarcoma (UCS)
NA: not applicable; OS: Overall survival; PFI: Progression Free Survival.
*: FC calculated as: ± 2^(|log2 Mean(Exon 9) – log2 Mean(Exon 2|).
§: Survival analysis calculated by the log2 Mean(Exon 9) – log2 Mean(Exon 2)
ⴕ : Survival analysis calculated using Xena UCSC

## Sheet: Table S2
Table S2. Correlation analysis between IL6 expression and CG probesets methylation within IL6 locus. Pearson’s correlation coefficients with p ≤ 0.05 were included
Tumor Type	cg17067544	cg01770232	cg26061582	cg05472934	cg00087425	cg15703690	cg13104385	cg05265849	cg07998387	cg02335517
Acute Myeloid Leukemia (LAML)						0.332593
Adrenocortical Cancer (ACC)							-0.298052	-0.263004		-0.226513
Bile Duct Cancer (CHOL)					-0.309051		-0.382401	-0.395607
Bladder Cancer (BLCA)	0.246594	-0.151546	-0.206535		-0.214857		-0.13518	-0.196937		0.137803
Breast Cancer (BRCA)	0.195193		-0.100654	-0.118409	-0.0850052		-0.072042		0.0971142
Cervical Cancer (CESC)		-0.130758			-0.171227	-0.148188	-0.47687	-0.480248	-0.283342	-0.197952
Colon Cancer (COAD)	0.189163	0.144402
Endometrioid Cancer (UCEC)										0.25161
Esophageal Cancer (ESCA)	0.197707							-0.142565
Glioblastoma (GBM)			-0.313412	-0.222534			-0.425173	-0.323503
Head and Neck Cancer (HNSC)							-0.235979	-0.204723	-0.119626
Kidney Chromophobe (KICH)	-0.239597						-0.362106
Kidney Clear Cell Carcinoma (KIRC)	-0.255153	-0.164202	-0.13016		-0.280477		-0.436057	-0.388168	-0.259133	-0.200587
Kidney Papillary Cell Carcinoma (KIRP)		0.122851					-0.634485	-0.535283	-0.35547
Large B-cell Lymphoma (DLBC)
Liver Cancer (LIHC)	0.356677		-0.180581	-0.16283
Lower Grade Glioma (LGG)	-0.222302	-0.0974916	-0.10837	-0.106135			-0.330098	-0.20094	-0.264115	0.0106845
Lung Adenocarcinoma (LUAD)					-0.0952956		-0.301059	-0.326445
Lung Squamous Cell Carcinoma (LUSC)	0.150946				-0.16292	-0.145097	-0.238146	-0.251613	-0.124208
Melanoma (SKCM)	0.173547	-0.207917	-0.234045	-0.229638	-0.229745	-0.200492	-0.292529	-0.32505	-0.287781	-0.127194
Mesothelioma (MESO)							-0.3359	-0.280621	-0.321344
Ocular melanomas (UVM)						0.382106
Ovarian Cancer (OV)					-0.734278
Pancreatic Cancer (PAAD)	0.247549		-0.184891		-0.231349	-0.16724	-0.279083	-0.338838
Pheochromocytoma & Paraganglioma (PCPG)							-0.291605
Prostate Cancer (PRAD)	0.0995375	0.150626			0.0990943	0.151698			0.0913091	0.126361
Rectal Cancer (READ)
Sarcoma (SARC)							-0.272634	-0.25359
Stomach Cancer (STAD)	0.156289				-0.116439	-0.105711
Testicular Cancer (TGCT)	-0.329349	-0.410599	-0.465529	-0.363298	-0.431256	-0.333548	-0.589234	-0.479128	-0.483689	-0.475759
Thymoma (THYM)	-0.212431					0.210999				-0.270675
Thyroid Cancer (THCA)	-0.138126				-0.122332	0.236599	-0.248262	-0.218449
Uterine Carcinosarcoma (UCS)

## Sheet: Table S3
Table S3. Correlation analysis between IL6R expression and CG probesets methylation within IL6R locus. Pearson’s correlation coefficients with p ≤ 0.05 were included.
Tumor Type	cg26538164	cg06980173	cg04715245	cg24346686	cg11078914	cg25853020	cg23890158	cg04185861	cg03957204	cg26822854	cg23026211	cg07721365	cg09257526	cg04437762	cg05756780	cg00791854	cg17427986	cg20688791	cg17001401	cg25135018	cg21262032	cg13549904	cg15633035
Acute Myeloid Leukemia (LAML)		-0.484303						-0.214109					-0.452749	-0.19441	-0.332854			0.172041			0.211597
Adrenocortical Cancer (ACC)			-0.218311				-0.237661	-0.235298	-0.235893	-0.241063		-0.222662	-0.508961	-0.384572	-0.390322	-0.234374
Bile Duct Cancer (CHOL)													-0.360879	-0.480867
Bladder Cancer (BLCA)	0.352477	0.117622	0.23881									-0.194419	-0.312309	-0.493777	-0.207556	0.114393	0.39246	0.407628	0.403646		0.114	0.388794	0.340306
Breast Cancer (BRCA)		-0.299781	-0.0954352	-0.26739	-0.138021	-0.211036						-0.156827	-0.395039	-0.281607	-0.287638	-0.149934	0.243822	0.213712		-0.145104	-0.227259	0.147468
Cervical Cancer (CESC)	0.113095		0.121854								-0.124606	-0.331144	-0.306074	-0.292833	-0.295303		0.121139	0.280376				0.211539	0.212315
Colon Cancer (COAD)	0.115406		0.179851									-0.167841	-0.295397	-0.237382	-0.355697	0.155709	0.195411			-0.170849	-0.133188		0.145171
Endometrioid Cancer (UCEC)						-0.150638							-0.446982	-0.328763	-0.378352				0.232664	-0.234085
Esophageal Cancer (ESCA)	0.245166										-0.206679	-0.243125	-0.266847	-0.20168	-0.345037		0.19795	0.30444	0.347518	0.146392		0.218487	0.306242
Glioblastoma (GBM)				-0.280349		-0.256569							-0.363977	-0.493812					0.2898	-0.389539	-0.428093
Head and Neck Cancer (HNSC)		-0.096746				0.156946							-0.298713	-0.163574	-0.139861	-0.134769		0.238392		0.25654		0.236341	0.255835
Kidney Chromophobe (KICH)												-0.448806	-0.332013		0.25446
Kidney Clear Cell Carcinoma (KIRC)				-0.236163			0.147763						-0.310079	-0.172917			-0.305765	0.116595	0.203359	-0.277226
Kidney Papillary Cell Carcinoma (KIRP)	0.17072											0.12214	-0.264356	-0.234033		0.148777	-0.135627	0.168776				0.196193	0.195826
Large B-cell Lymphoma (DLBC)				-0.28751		-0.417467	-0.364633	-0.381658				-0.381004	0.303327	0.367365	0.33204			0.366405		-0.394165
Liver Cancer (LIHC)		-0.31931	-0.278586	-0.265971	-0.170536	-0.111014							-0.427484	-0.365313	-0.403919	-0.282129				0.189084	0.107157	-0.146237	0.382883
Lower Grade Glioma (LGG)		-0.18126	-0.101954	-0.181762						0.105971		-0.0916851	-0.281848	-0.333539						-0.15561
Lung Adenocarcinoma (LUAD)	0.229299	0.197182	0.165483										-0.527426	-0.494726	-0.547723	-0.239451	0.0971431					0.130146	0.386739
Lung Squamous Cell Carcinoma (LUSC)	0.185719												-0.408019	-0.342355	-0.338569	-0.246623	0.288783	0.223456	0.398158	0.0368083	0.121645	0.253536	0.279842
Melanoma (SKCM)													-0.508085	-0.484054	-0.412456	-0.26934	-0.399762	-0.177079	0.238571		-0.11046		0.261969
Mesothelioma (MESO)		-0.237842							0.248945				-0.589851	-0.554201	-0.596114
Ocular melanomas (UVM)			-0.289292		-0.288296	-0.313169							-0.581053	-0.487594		-0.32574	-0.295715	-0.496755				-0.303133
Ovarian Cancer (OV)										0.656139			-0.853907	-0.773707	-0.936555	-0.735463					-0.791479
Pancreatic Cancer (PAAD)													-0.494683	-0.439402	-0.533193				0.157928		-0.186197
Pheochromocytoma & Paraganglioma (PCPG)	0.17182													-0.297611			0.187355		0.209386		-0.199496	0.209823
Prostate Cancer (PRAD)		-0.212176		-0.121058	-0.153567		0.116987	0.0996128				-0.118973	-0.421412	-0.453135	-0.334916		-0.178222	-0.208885			-0.0891575	-0.204469	-0.103429
Rectal Cancer (READ)	0.272131	0.202872												-0.329239	-0.350337		0.296866	0.232237				0.213629	0.334089
Sarcoma (SARC)	0.307568	0.328966	0.27104	0.304129									-0.271565		-0.310088	-0.299966						0.203565	0.358482
Stomach Cancer (STAD)	0.248614		0.170865									-0.134734	-0.362406	-0.298866	-0.419152	0.162709		0.298012	0.271975	-0.120835	-0.13037	0.151829
Testicular Cancer (TGCT)	-0.59234	-0.701522	-0.548519	-0.469151	-0.296772	-0.4381			0.174338		-0.192415	-0.306417	-0.751015	-0.704185	-0.674083	-0.248918	-0.65594	-0.614558	-0.587672	-0.640066	-0.630341	-0.70954	-0.405412
Thymoma (THYM)	-0.242026	0.499311	0.283355	0.31783									-0.511145		-0.631523	-0.571088	-0.223079	0.26362		0.180754		-0.298719
Thyroid Cancer (THCA)		-0.474947	-0.234366	-0.316594	-0.112065	-0.19547							-0.51792	-0.346473	-0.528314	0.317208	0.092987			-0.314059	-0.49931		-0.144487
Uterine Carcinosarcoma (UCS)		-0.277538											-0.264206								-0.328198

## Sheet: Table S4
Table S4. Correlation analysis between IL6ST expression and CG probesets methylation within IL6ST locus. Pearson’s correlation coefficients with p ≤ 0.05 were included
Tumor Type	cg09043153	cg27568809	cg13576061	cg13648373	cg17977795	cg16400488	cg13999099	cg18022362	cg10850054	cg15219433	cg21950518	cg11163388	cg16375820	cg18700420	cg20703731	cg03709475	cg05650238	cg26103526
Acute Myeloid Leukemia (LAML)	-0.167088							-0.153662					-0.176435	-0.229308	0.19403		0.414993	-0.189657
Adrenocortical Cancer (ACC)						0.404677		-0.274056			-0.245485
Bile Duct Cancer (CHOL)							0.348055
Bladder Cancer (BLCA)	0.0964731												-0.215206	0.103193				0.174192
Breast Cancer (BRCA)	0.0725298		-0.17812	-0.15809	-0.0687349				-0.0726588	-0.109055		-0.15474	-0.462863	-0.356368	0.00819303	0.326288	0.294061
Cervical Cancer (CESC)		-0.115816	0.124361						-0.190295		-0.222178	-0.144384			0.21809
Colon Cancer (COAD)													-0.224542		-0.120954	0.13394	-0.144214
Endometrioid Cancer (UCEC)				0.163497	0.217111								-0.14673
Esophageal Cancer (ESCA)		-0.15737		-0.170596	-0.185583	0.150783	0.208725		-0.266851	-0.237354		-0.271619	-0.262607		0.145087			0.141576
Glioblastoma (GBM)		-0.276						-0.297
Head and Neck Cancer (HNSC)	0.244041	0.216521		-0.118413		0.121783	0.141097			-0.119614				0.181823	0.107421		0.100258	0.136302
Kidney Chromophobe (KICH)		-0.318964
Kidney Clear Cell Carcinoma (KIRC)			-0.179761		-0.114407								-0.138882		-0.168492		0.131157
Kidney Papillary Cell Carcinoma (KIRP)				-0.130064						-0.122589		-0.190854	-0.14597		0.170195
Large B-cell Lymphoma (DLBC)					-0.359381			-0.495845	-0.499199	-0.430684	-0.537441		-0.298185		0.299641
Liver Cancer (LIHC)			-0.129904								-0.110478
Lower Grade Glioma (LGG)	0.125802		-0.137509			0.0875914						-0.0997839		0.117697		-0.0849672
Lung Adenocarcinoma (LUAD)	0.115364	0.105108	-0.119546			0.0973706	0.125242						-0.32576	-0.218238			0.15371
Lung Squamous Cell Carcinoma (LUSC)	0.163439		-0.271565	-0.137275		0.182297		-0.123913		-0.218075		-0.15588	-0.261471					0.104427
Melanoma (SKCM)	0.179598		-0.132752		-0.159042	0.174795	0.0997453	-0.129964		-0.139859		-0.123962	-0.32627	-0.138924		0.137175	0.224215	0.177453
Mesothelioma (MESO)					0.222689			0.224148								-0.218049
Ocular melanomas (UVM)
Ovarian Cancer (OV)
Pancreatic Cancer (PAAD)			-0.158615		-0.243056	0.0790973	0.0798847	0.0256934	0.180075						-0.236547
Pheochromocytoma & Paraganglioma (PCPG)		-0.153821											-0.192608
Prostate Cancer (PRAD)	0.129805		-0.270712			0.124659	0.110282						-0.0760254	0.103372	-0.183909
Rectal Cancer (READ)					-0.408088			-0.349067	-0.468042	-0.369912		-0.205094				0.304538
Sarcoma (SARC)		-0.188186											-0.243964			0.173957	0.23311
Stomach Cancer (STAD)		-0.181907	-0.153738	-0.118616	-0.138859	0.126053			-0.1287	-0.201749		-0.117266	-0.176718				-0.17961
Testicular Cancer (TGCT)		-0.212883	0.211228			-0.22525				0.198255	-0.018702	0.0253951	-0.189553	-0.215605	-0.25311		-0.208614	-0.248977
Thymoma (THYM)	-0.214874												-0.276083				0.419822	-0.276324
Thyroid Cancer (THCA)		0.190165	-0.115281				0.129802								-0.127406		-0.0889731
Uterine Carcinosarcoma (UCS)

## Sheet: Table S5
Table S5. Correlation analysis between IL6 gene expression and expression levels of miRNAs related to IL6 (mirDIP tool) in all TCGA tumors. In table are reported the miRNAs showing Pearson’s r ≥ 0.3 or ≤ -0.3 , p ≤ 0.05. The mirDIP Score class for each miRNA is listed
MIMAT (human)	miRNA ID (human)	mirDIP Score class IL6	LAML	ACC	CHOL	BLCA	BRCA	CESC	COAD	UCEC	ESCA	GBM	HNSC	KICH	KIRC	KIRP	DLBC	LIHC	LGG	LUAD	LUSC	SKCM	MESO	UVM	OV	PAAD	PCPG	PRAD	READ	SARC	STAD	TGCT	THYM	THCA	UCS
MIMAT0000280	miR-223-3p	Medium		0.438965	0.507029	0.523393	0.611404	0.351434	0.447665	0.344435			0.344758	0.619925	0.319126	0.30377	0.441756	0.504889	0.427443	0.423411		0.594488	0.53427	0.503768	0.40457	0.335626	0.554747	0.493571	0.391545	0.620342			0.538909	0.570077	0.306114
MIMAT0019927	miR-4772-3p	Low		0.494555	0.384192	0.404201	0.367815		0.311972					0.37393		0.312039		0.40873	0.300024	0.349004		0.425871	0.378935	0.331413		0.353069	0.383528		0.339417	0.444852		0.42091	0.417157	0.308836
MIMAT0004501	miR-27a-5p	Medium			0.337181		0.521967			0.320817				0.549455		0.314377		0.431715	0.485963	0.447265			0.588763		0.313716	0.451051	0.397552	0.620556				0.390642	0.602596	0.661321	0.357511
MIMAT0000433	miR-142-5p	Medium		0.447446	0.456883	0.466655	0.33062							0.55936		0.321734	-0.44117	0.408327	0.472291			0.396748	0.388503	0.486309		0.336407	0.457927			0.50068		0.486412		0.483621
MIMAT0004570	miR-223-5p	Medium		0.410345	0.517091	0.375869	0.376905		0.35499					0.661093				0.424189	0.354068	0.301526		0.428088	0.311208	0.381938			0.320677			0.461738			0.405211	0.412814
MIMAT0000451	miR-150-5p	Medium	0.357658	0.381397	0.525329	0.467242	0.420098							0.501484		0.329238		0.388456					0.443385	0.45854	0.391791	0.369711	0.402805			0.425798		0.372081		0.428608
MIMAT0004494	miR-21-3p	Low		0.480738						0.414301				0.587718	0.454681				0.557859			0.325009	0.344061	0.328256	0.370121		0.680385	0.359749				0.466687	0.477719	0.590696	0.30444
MIMAT0002808	miR-511-5p	Medium		0.370542	0.4843	0.441699	0.402034		0.3222					0.53991	0.330476	0.399948		0.332868					0.331739				0.375757			0.414218				0.448373
MIMAT0004766	miR-146b-3p	Medium		0.558175	0.48481	0.592795	0.490101		0.3954					0.559844					0.334097			0.42322		0.520418		0.42313	0.337324		0.306974			0.474619
MIMAT0000434	miR-142-3p	High		0.466981	0.447445	0.421987								0.548866				0.396251	0.441196			0.307719		0.393992			0.424623			0.442163		0.485242		0.408547
MIMAT0002809	miR-146b-5p	Medium		0.546578	0.483367	0.543293	0.43942		0.329663					0.483125			0.359661					0.380007		0.553232					0.333535	0.3534		0.373347
MIMAT0000076	miR-21-5p	Medium		0.353961										0.459898	0.363216		0.435982		0.458437								0.570697			0.403252		0.316313	0.517318	0.399591	0.318447
MIMAT0000232	miR-199a-3p	Medium				0.475497								0.454215		0.37287		0.445353	0.332103			0.343085		0.335845			0.438718					-0.45927	0.45211	0.528913
MIMAT0000263	miR-199b-5p	Medium		0.321669		0.320644								0.430332	0.377256	0.380341		0.367386	0.301191					-0.375253								-0.448196	0.409845	0.538076
MIMAT0004563	miR-199b-3p	Medium				0.47526								0.454096		0.371547		0.444645	0.33158			0.342747		0.334645			0.438899					-0.459172	0.452192	0.529046
MIMAT0000271	miR-214-3p	Medium				0.384154								0.442643		0.365992		0.385523				0.336937	0.300007		0.304574		0.472994					-0.413676	0.407705	0.4699
MIMAT0000449	miR-146a-5p	Medium		0.375007	0.484291	0.348361	0.309062							0.497548			-0.331057										0.372758			0.398429		0.322903	0.383108	0.352028
MIMAT0001631	miR-451a	Medium	0.347694		0.433538																		0.475223		0.316204	0.355482	0.306597	0.312988	0.368768				0.41286	0.37415	0.305195
MIMAT0004496	miR-23a-5p	Medium								0.323886				0.444349				0.342945	0.401949				0.420891		0.392293	0.369855		0.371436					0.522737	0.488777
MIMAT0000231	miR-199a-5p	Medium				0.348424								0.433933		0.327522	-0.328866	0.42102						0.386543			0.403091					-0.47226	0.380895	0.475103
MIMAT0000646	miR-155-5p	Medium		0.512562	0.461697	0.443702								0.565051				0.315258	0.360089					0.490181			0.416113					0.38555		0.345573
MIMAT0000435	miR-143-3p	Medium			0.402903	0.405164								0.349169		0.419309		0.349165					0.347641	0.378331			0.366488						0.417636
MIMAT0000447	miR-134-5p	Medium				0.352876								0.514951	0.355523	0.391524						0.334643		0.362347				0.31819			0.309819			0.509474
MIMAT0004610	miR-150-3p	Medium	0.309009													0.360916	-0.419385	0.338394					0.386997	0.355021	0.33467	0.46505								0.325671
MIMAT0030017	miR-7702	Medium	0.431603	0.42073										0.428465					0.322322					0.413487	0.324996				0.353967			0.443469	0.35174
MIMAT0004564	miR-214-5p	Low				0.387905								0.435391		0.348642		0.392919									0.409323					-0.446042	0.378033	0.491932
MIMAT0000318	miR-200b-3p	Medium				-0.504481		-0.402192	-0.323353		-0.328438													0.411638		-0.486228			-0.305296			-0.461423
MIMAT0000415	let-7i-5p	Very High				0.36648	0.341259		0.328619					0.441931	0.327165	0.320423		0.389027											0.335404
MIMAT0000437	miR-145-5p	Medium				0.39537								0.328533		0.395197		0.408818				0.314183		0.361348			0.328375					-0.366199
MIMAT0004601	miR-145-3p	Low				0.417573								0.31382		0.391128		0.398102				0.350815		0.395283			0.332041					-0.397796
MIMAT0000733	miR-379-5p	Medium				0.345871			0.343202					0.527557	0.333611	0.395975								0.363218							0.342149			0.516814
MIMAT0000736	miR-381-3p	Medium				0.341664	0.353103							0.554814	0.310606	0.418623						0.305587										0.347223		0.497637
MIMAT0000737	miR-382-5p	Medium				0.337987								0.513761	0.33451	0.418283						0.325003		0.324648							0.317621			0.462649
MIMAT0001635	miR-452-5p	Medium					0.385876			0.364538				0.437857		0.422794			0.408071			0.359865		0.531205			0.336435
MIMAT0022929	miR-758-5p	Low				0.301533			0.302422					0.568421		0.333346						0.316544		0.308035							0.316935			0.423735
MIMAT0022721	miR-1247-3p	Low														0.432067							0.38257	0.40825	0.346283			0.38532				-0.399746	0.485485	0.561629
MIMAT0027409	miR-6754-3p	Low				-0.308285		0.498765						0.925873				0.32235	0.319613									-0.400518			-0.423266	0.559695
MIMAT0004497	miR-24-2-5p	Medium												0.449125	0.30836			0.460005	0.373504					0.3907									0.482005	0.319037
MIMAT0000270	miR-181a-3p	Low		0.302269	0.353379									0.532311				0.366073									0.444886					-0.404036	-0.309341
MIMAT0000446	miR-127-3p	Medium				0.362548					0.30699			0.50767		0.394165						0.314017		0.353806										0.494806
MIMAT0000753	miR-342-3p	Medium	0.394916		0.366448									0.444323	0.311642		-0.324329	0.38606						0.481312
MIMAT0002177	miR-486-5p	Medium	0.382511		0.403632																		0.493206		0.459886			0.304273	0.428933				0.448659
MIMAT0003266	miR-598-3p	Medium			-0.343983	-0.313334								-0.311077			-0.550552										-0.341156					-0.414033		-0.354048
MIMAT0004981	miR-938	Medium														0.370612									0.538213		0.55627	-0.306368		0.485495		0.564404			0.502132
MIMAT0005899	miR-1247-5p	Medium														0.447811	-0.350364							0.331643	0.357165							-0.474612	0.345914	0.410696
MIMAT0019855	miR-4732-5p	Low		0.880322			-0.403044		-0.56564															0.692187	0.446268							0.453986	0.506581
MIMAT0019926	miR-4772-5p	Medium		0.695181										0.356375				0.415347				0.383109								0.317354		0.384165	0.443435
MIMAT0027673	miR-6886-3p	Low					0.31784	0.403358						-0.712672				-0.354129			-0.33053									-0.706653		0.725116
MIMAT0000084	miR-27a-3p	Medium												0.463791				0.39073	0.354548											0.322647			0.416802	0.326247
MIMAT0000087	miR-30a-5p	Medium												-0.420919	-0.442511	-0.300192	-0.309281															-0.47128		-0.345789
MIMAT0000245	miR-30d-5p	Medium				-0.39874					-0.315513				-0.357519	-0.388434																-0.45537		-0.338454
MIMAT0004567	miR-219a-1-3p	Medium				-0.406053											-0.340415							-0.495879								-0.324572	-0.409189	-0.335067
MIMAT0000281	miR-224-5p	Medium												0.362903		0.397638			0.35634			0.319202		0.435263			0.344908
MIMAT0009198	miR-224-3p	High			-0.388819	-0.301333				0.314789						0.341803			0.316036													-0.331091
MIMAT0000416	miR-1-3p	Medium			0.381716											0.372586		0.346579									0.399822					-0.426501	0.343096
MIMAT0004600	miR-144-5p	Low	0.396491																0.311315				0.402497			0.397981			0.459866				0.360415
MIMAT0000617	miR-200c-3p	Medium		0.309887		-0.452112										0.328011								0.404675		-0.422225								-0.336986
MIMAT0004674	miR-30c-1-3p	Medium			-0.438831	-0.300465								-0.354859			-0.371365							-0.343156								0.378795
MIMAT0000682	miR-200a-3p	Medium				-0.504063		-0.345069	-0.307868		-0.329111															-0.436872						-0.474728
MIMAT0000692	miR-30e-5p	Medium				-0.405885								-0.311966		-0.321587	-0.364728																-0.319742	-0.373527
MIMAT0004697	miR-151a-5p	Medium	0.345577	0.330031		-0.365732											-0.415344	-0.358228																-0.350937
MIMAT0001536	miR-429	Medium				-0.472088		-0.340471	-0.311757		-0.320353															-0.463899						-0.479488
MIMAT0026606	miR-511-3p	Low												0.527675	0.314808				0.306276								0.367908			0.318991				0.36552
MIMAT0002813	miR-493-5p	Medium												0.472399		0.343068						0.319037		0.409167					0.314407					0.430878
MIMAT0002866	miR-517c-3p	Medium		-0.968282							-0.430544					0.509638										-0.440354		0.665331				0.363618
MIMAT0004985	miR-942-5p	Medium		0.301598															0.344979				0.318025				0.338543					0.651496		0.352594
MIMAT0009451	miR-1976	Medium												0.415492				0.312209	0.368352					0.316658	0.337141							0.342976
MIMAT0017992	miR-3614-5p	Medium		0.356565										0.493945			0.325467		0.345147													0.532673	0.330311
MIMAT0022287	miR-5586-5p	Medium	0.336187			0.350532								0.531035										0.399041									0.346404	0.317156
MIMAT0027393	miR-6746-3p	Low		0.317723						-0.332682					0.369341									-0.312336				-0.403203				0.649603
MIMAT0027438	miR-6769a-5p	Low		0.972651				0.761756					0.667726																	-0.997719		0.518702		-0.313432
MIMAT0027449	miR-6774-3p	Low		0.717745					-0.360431								-0.480972							-0.55901						-0.510162		0.300066
MIMAT0027646	miR-6873-5p	Low				0.873198	0.8297						-0.882566						0.849909						0.344841									-0.787075
MIMAT0000064	let-7c-5p	Very High				0.392822	0.322548	-0.301701																-0.312968								-0.464325
MIMAT0000072	miR-18a-5p	Medium		0.31942										0.32063	0.379701												0.436473							0.308589
MIMAT0000078	miR-23a-3p	Medium												0.348977			-0.489578	0.343337	0.356224													-0.363215
MIMAT0000086	miR-29a-3p	Medium	0.327129			0.454554	0.307343																							0.329233		0.365635
MIMAT0000088	miR-30a-3p	Low												-0.375341	-0.437111		-0.391274															-0.385461		-0.32203
MIMAT0000095	miR-96-5p	Medium			-0.353672	-0.398529			-0.331942																	-0.390055						0.665366
MIMAT0000097	miR-99a-5p	Medium				0.429296		-0.310924							-0.344604									-0.376465								-0.458893
MIMAT0000101	miR-103a-3p	High				-0.358905								0.396198										0.346498								-0.419316		-0.319478
MIMAT0004516	miR-105-3p	Medium		0.999749					0.946386	-0.628402																-0.96785						0.445365
MIMAT0004550	miR-30c-2-3p	Medium												-0.312835	-0.387426		-0.343506															-0.349376		-0.345106
MIMAT0022692	miR-181b-3p	Medium		0.368577										0.521412				0.331034									0.357749						-0.310915
MIMAT0000259	miR-182-5p	High	0.369682		-0.346713	-0.399858																				-0.377221						0.604265
MIMAT0000265	miR-204-5p	Medium		-0.336661											-0.379098	-0.423042								0.306661								-0.442963
MIMAT0000269	miR-212-3p	Medium				0.443726			0.300205					0.496818		0.326131								0.37437
MIMAT0000274	miR-217	Very High												0.347501		0.348854								0.407701									0.458175	0.351243
MIMAT0000278	miR-221-3p	Medium		0.345389										-0.31486		0.361172								-0.313327			0.48688
MIMAT0004585	let-7i-3p	Low				0.364986								0.378486	0.360251			0.342963															0.370871
MIMAT0000418	miR-23b-3p	High		0.304611											-0.397702		-0.388252						-0.301397									-0.579331
MIMAT0000426	miR-132-3p	Medium				0.426608			0.408182					0.386174						0.30757									0.34509
MIMAT0000427	miR-133a-3p	Medium														0.321205		0.327756									0.429942					-0.486388	0.381953
MIMAT0004597	miR-140-3p	Medium			0.509946		0.370602										-0.433326							-0.337757		0.435277
MIMAT0004598	miR-141-5p	Low				-0.427266										0.36264			0.30068							-0.347639						0.483858
MIMAT0000432	miR-141-3p	Medium		0.316367		-0.465669			-0.300909							0.321063										-0.42955
MIMAT0000436	miR-144-3p	High																					0.421059			0.344227			0.328113				0.340894	0.325672
MIMAT0000438	miR-152-3p	Medium			0.420634	0.330195								0.439708			-0.37571															-0.430903
MIMAT0000441	miR-9-5p	High								-0.316982					0.38053				-0.321487					0.316628									0.332159
MIMAT0000460	miR-194-5p	Medium			-0.337725	-0.303165																				-0.438446			-0.301154			-0.34937
MIMAT0004658	miR-155-3p	Low	-0.374583	0.523843															0.40386					0.362026								0.445729
MIMAT0001620	miR-200a-5p	Medium				-0.486012		-0.359581																0.306189		-0.354999						-0.37271
MIMAT0001621	miR-369-5p	Medium				0.324474								0.475122		0.387526						0.365701												0.437481
MIMAT0000731	miR-378a-5p	Medium					0.327851							0.340902										-0.376275			0.313595					0.567004
MIMAT0000732	miR-378a-3p	Low				-0.328488	0.337768	-0.356469																-0.409053								0.543345
MIMAT0004698	miR-135b-3p	Low															0.527495									-0.300545				-0.345894		0.435207	0.420249
MIMAT0004757	miR-431-3p	Low												0.456194	0.321314	0.330789								0.379408										0.346277
MIMAT0001639	miR-409-3p	Medium												0.486685		0.371975						0.342974		0.401664										0.404817
MIMAT0002176	miR-485-3p	Medium												0.482763	0.303336	0.395176						0.313002												0.364583
MIMAT0004762	miR-486-3p	Medium			0.553357																		0.359222	0.475183								0.383444	0.452722
MIMAT0002814	miR-432-5p	Medium												0.468838		0.333865						0.32022		0.393294										0.400852
MIMAT0002817	miR-495-3p	High												0.405181	0.343216	0.403535						0.355796												0.454652
MIMAT0002825	miR-520e	Medium														0.776982											-0.684951			-0.476141		0.580406		-0.597197
MIMAT0002832	miR-519c-3p	Medium												0.801152		0.719063							-0.707222							-0.319657		0.506926
MIMAT0003150	miR-455-5p	Medium												0.342477					0.351103								0.485605					-0.408211	-0.383391
MIMAT0004784	miR-455-3p	Medium												0.367115					0.312994								0.40331					-0.433877	-0.383509
MIMAT0003247	miR-582-5p	Medium		0.412423	0.392931			0.391457						-0.317759																		-0.372058
MIMAT0004797	miR-582-3p	Medium		0.43814	0.380421			0.370782						-0.312087																		-0.324327
MIMAT0003258	miR-590-5p	Medium															-0.422126								-0.400827							0.467215	-0.309398		-0.356587
MIMAT0004807	miR-624-3p	Medium						0.366161						-0.914473						0.31629								-0.476977				0.485654
MIMAT0005799	miR-1283	Medium												0.709071		0.816448								0.832395								0.349496		-0.401591
MIMAT0003886	miR-769-5p	Low				-0.308232											-0.355035							-0.300733								-0.352071	-0.310326
MIMAT0004910	miR-450b-3p	Low																-0.454125								-0.538869		-0.616951				0.384968	0.552948
MIMAT0004924	miR-876-5p	Medium								-0.404958					0.818267											-0.37961				-0.439071	0.388601
MIMAT0004928	miR-147b	Medium	-0.500509	0.683555	0.426693										0.32121																		0.311364
MIMAT0005591	miR-1236-3p	Medium				-0.590663					-0.956868							-0.59172														0.57924		-0.500375
MIMAT0005919	miR-548o-3p	High		0.314872										0.562132			-0.324532															0.373713	-0.301393
MIMAT0026742	miR-1266-3p	Low				-0.356378		0.453946							-0.925613													-0.439585				0.494657
MIMAT0022727	miR-1307-5p	Low			-0.332274	-0.342793												-0.313781									-0.384888								-0.489689
MIMAT0014986	miR-3124-5p	Low								-0.47353					0.560898															0.583212		0.463071	-0.306231
MIMAT0015005	miR-3137	Medium	0.34937	0.87184						-0.322068									0.427381													0.398354
MIMAT0019206	miR-3150a-5p	Medium									-0.360216				0.499825													-0.325349				0.394536	-0.350367
MIMAT0001630	miR-323b-5p	Low		-0.37373		-0.45782														-0.430915								-0.572985		-0.338893
MIMAT0018003	miR-3622a-5p	Medium								0.428452											0.526347	0.537594		-0.998598								0.649178
MIMAT0018192	miR-3918	Low	-0.910278			-0.415746												-0.636211														0.648623		-0.41685
MIMAT0019026	miR-4491	Low															-0.332392							0.553617			0.768776					0.421936	0.320503
MIMAT0019707	miR-4646-5p	Medium					-0.37055	0.493522			-0.403204																	-0.771793				0.601176
MIMAT0019856	miR-4732-3p	Low																					0.473348	0.347181	0.388442	0.368392							0.404922
MIMAT0022280	miR-5582-3p	Medium																	0.329812								0.312957	-0.310689				0.329209	-0.362567
MIMAT0022294	miR-1295b-3p	Low									-0.700639		-0.406919										-0.764327		0.812565							0.556959
MIMAT0027366	miR-6732-3p	Medium						0.403151		-0.517975																		-0.385974				0.626843	0.829028
MIMAT0027378	miR-6738-3p	Medium													0.452713											0.541621	-0.579891	-0.556881							-0.347606
MIMAT0027607	miR-6853-3p	Low								-0.346292														-0.397945		-0.390522		-0.381855	0.532481
MIMAT0027626	miR-6862-3p	Low	-0.880918																0.544887				-0.917709					0.730061				0.444136
MIMAT0028230	miR-7160-5p	Medium				-0.954082													0.346226									-0.673465				0.815175			0.999981
MIMAT0030413	miR-4433b-5p	Medium		0.726136																0.34627					0.359769					-0.402396		0.357402
MIMAT0031179	miR-7976	Low		0.787039							-0.404145								0.32773									-0.479589				0.393652
MIMAT0004484	let-7d-3p	Medium															-0.516128							-0.358029								-0.419255	-0.316483
MIMAT0004495	miR-22-5p	Medium				0.381462		0.374043										0.397823														0.302022
MIMAT0000079	miR-24-1-5p	Medium																					-0.30541			-0.369048			-0.302962			-0.431517
MIMAT0000080	miR-24-3p	Medium												0.337991										0.335822								-0.344348	0.448339
MIMAT0000085	miR-28-5p	Medium		0.319561													-0.386721							-0.468035								-0.533112
MIMAT0004502	miR-28-3p	Medium															-0.339103							-0.405359			0.326986					-0.423691
MIMAT0000098	miR-100-5p	Medium				0.52048	0.332717																			0.330905						-0.37569
MIMAT0004513	miR-101-5p	Medium			0.364246												-0.488785												-0.316307			0.486334
MIMAT0000100	miR-29b-3p	Medium	0.336857														-0.31463													0.309163		0.405511
MIMAT0000222	miR-192-5p	Medium			-0.360694											-0.31528		-0.300114								-0.432989
MIMAT0000227	miR-197-3p	Medium		0.312158										0.440734			-0.310024							-0.351079
MIMAT0000228	miR-198	Medium						0.769625							0.705971								0.685752									0.631476
MIMAT0000252	miR-7-5p	Medium												0.404443			0.495312							0.372839								0.36748
MIMAT0004553	miR-7-1-3p	Medium												0.321198																		0.525996	-0.310688		-0.314189
MIMAT0000253	miR-10a-5p	Medium				-0.352453								-0.462126				0.421117															0.375381
MIMAT0004555	miR-10a-3p	Low			0.339957	-0.364596								-0.320502				0.323628
MIMAT0000256	miR-181a-5p	Medium																						-0.322264			0.342443					-0.496293	-0.336368
MIMAT0000261	miR-183-5p	Medium	0.349692			-0.370714																				-0.343149						0.519978
MIMAT0022693	miR-204-3p	Medium		-0.423301							0.561996				-0.389032																	-0.45556
MIMAT0000275	miR-218-5p	Medium					0.342515											0.409392						0.384719								-0.450777
MIMAT0004565	miR-218-1-3p	Medium												-0.307729			-0.465705									0.334427						-0.461617
MIMAT0000276	miR-219a-5p	Low				-0.300908								0.429826																		-0.304003	-0.346389
MIMAT0004569	miR-222-5p	Low														0.300787			0.357724								0.377056					0.332095
MIMAT0000279	miR-222-3p	Medium		0.326915												0.34636								-0.316453			0.488289
MIMAT0004593	miR-130a-5p	Medium		0.32066																				-0.323923								0.361724	-0.304716
MIMAT0004594	miR-132-5p	Low				0.365112								0.399561			-0.386261																		0.373552
MIMAT0004599	miR-143-5p	Low														0.340668											0.346317					-0.396884	0.41923
MIMAT0000443	miR-125a-5p	Medium																					-0.348216				-0.413842					-0.440825		-0.346362
MIMAT0004603	miR-125b-2-3p	Medium				0.31016	0.316789																			0.338176						-0.475001
MIMAT0000444	miR-126-5p	Medium												0.304995									0.455274			0.387047	0.394149
MIMAT0000445	miR-126-3p	Medium												0.30154									0.406205			0.335876	0.350141
MIMAT0004604	miR-127-5p	Medium												0.521236		0.344169								0.340223										0.482899
MIMAT0000453	miR-154-3p	Medium												0.464434		0.390982																0.358458		0.30199
MIMAT0004657	miR-200c-5p	Medium		0.860126		-0.488156																	0.588044											-0.329465
MIMAT0004675	miR-219a-2-3p	Medium													0.333537						-0.338266		-0.559399												0.32411
MIMAT0004680	miR-130b-5p	Medium		0.32525		-0.309881											-0.324154																-0.327938
MIMAT0000693	miR-30e-3p	Low															-0.42006															0.325598	-0.329796	-0.337144
MIMAT0000721	miR-369-3p	Medium												0.440598	0.315424	0.365524																		0.407321
MIMAT0026483	miR-370-5p	Low												0.526583		0.375569								0.345355										0.429278
MIMAT0000723	miR-371a-3p	Medium																	0.625976		0.489085									-0.387483		0.749324
MIMAT0000726	miR-373-3p	Medium														0.498599			0.312087													0.739708		-0.356754
MIMAT0022862	miR-381-5p	Low												0.97471	0.358414		0.452025															0.333307
MIMAT0026485	miR-383-3p	Medium		-0.89908														-0.377761								-0.659072	-0.57467
MIMAT0000752	miR-328-3p	Medium															-0.496863										-0.408308					-0.48293		-0.438106
MIMAT0000754	miR-337-3p	Medium												0.450397		0.34929						0.308265												0.523647
MIMAT0000759	miR-148b-3p	Medium			-0.334414	-0.311216																		0.382219										-0.393176
MIMAT0000762	miR-324-3p	Medium				-0.341922								0.352885			-0.56927															-0.520551
MIMAT0004701	miR-338-5p	Very High												0.435158		0.342034																-0.510575			-0.324218
MIMAT0026555	miR-329-5p	Medium				-0.318124														-0.353331		0.340025								-0.393841
MIMAT0026605	miR-489-5p	Low		0.666057										-0.752178					0.373036								-0.414092
MIMAT0026608	miR-181d-3p	Low												0.952708		-0.392799											0.388651					0.518057
MIMAT0002827	miR-515-3p	Medium														0.779488								0.826545						-0.426946		0.512301
MIMAT0002836	miR-526b-3p	Low			-0.999422			0.464498								0.648298																0.373658
MIMAT0002843	miR-520b	Medium														0.579451	0.757084									0.576554						0.581262
MIMAT0002846	miR-520c-3p	Medium														0.579221	0.757084									0.576554						0.581395
MIMAT0002851	miR-517-5p	Low														0.62734														-0.303474		0.514533			-0.557089
MIMAT0026610	miR-519d-5p	Low						-0.997766								0.992881																0.346389		-0.832165
MIMAT0002859	miR-516b-5p	Medium														0.442875													0.478976			0.44744			-0.349117
MIMAT0005452	miR-519a-5p	Low						0.302285						0.604587		0.37187																0.476303
MIMAT0002862	miR-527	Medium									-0.440321					0.908627													-0.999561			0.447468
MIMAT0002879	miR-507	Medium			0.999878		0.35885																-0.342839	-0.449455
MIMAT0004779	miR-509-5p	Medium					0.540009												0.468936					-0.32339									-0.386265
MIMAT0003164	miR-544a	Medium		0.438844							-0.999899							-0.483648												-0.419806
MIMAT0003180	miR-487b-3p	Medium												0.529873		0.417938								0.405785										0.391922
MIMAT0003225	miR-561-3p	Medium		0.580663					-0.498662																				0.833812			0.451704
MIMAT0022707	miR-570-5p	Medium									-0.547428																	-0.351074				0.381021		-0.344378
MIMAT0004808	miR-625-3p	Medium			0.37331													0.387355					0.330534									0.543698
MIMAT0004810	miR-629-5p	Medium		0.309782															0.327119													0.619023	-0.322536
MIMAT0003330	miR-654-5p	Medium							0.310379					0.610776										0.326028										0.339492
MIMAT0003333	miR-549a	Medium		0.987333											-0.998213				0.40992														0.917568
MIMAT0006789	miR-1468-5p	Medium												-0.306729			-0.341302															-0.482103		-0.306792
MIMAT0006790	miR-675-3p	Medium													0.322444											0.487218						-0.313072		0.421552
MIMAT0004911	miR-874-3p	Low				-0.339831								-0.354013																			-0.303694	-0.405434
MIMAT0004927	miR-708-3p	Medium			0.404459													0.430533	0.31163					0.424964
MIMAT0004959	miR-216b-5p	High	-0.38322											0.522924										0.464789								-0.449553
MIMAT0022939	miR-939-3p	Low							0.562698								0.99996															0.557052		-0.344107
MIMAT0022946	miR-1237-5p	Low					-0.857494		-0.737177																								-0.999956	-0.744585
MIMAT0005889	miR-548l	Medium	0.348146											0.732378									0.56686	-0.483563
MIMAT0005894	miR-1243	Low													0.37971								-0.584561					-0.360203							-0.372813
MIMAT0005903	miR-1251-5p	Medium																					-0.656922							-0.353807		-0.423829		-0.379166
MIMAT0026765	miR-1537-5p	Low		0.645397																								-0.355775				0.369304	-0.365996
MIMAT0011159	miR-2115-3p	Medium													0.374073	0.332869						0.322111							0.343027
MIMAT0011160	miR-2116-5p	Medium		0.926527				0.338755																	0.375283							0.405387
MIMAT0014978	miR-3116	Medium																									0.76534	-0.511444		-0.91998		0.361651
MIMAT0014983	miR-3121-3p	Medium				-0.55116																			0.73209					0.650942		0.46947
MIMAT0015018	miR-3146	Medium		0.535427					-0.395198										0.308921													0.368163
MIMAT0019210	miR-3157-3p	Low												-0.396612										-0.389791				-0.366407					-0.330085
MIMAT0015033	miR-3159	Medium																	0.507274									-0.611768				0.553159			-0.96332
MIMAT0015049	miR-1193	Low							-0.614464							0.965551								-0.911351						-0.389163
MIMAT0015055	miR-3178	Low				0.482957													0.376449									-0.617567	0.781068
MIMAT0015084	miR-3199	Low		0.300103													-0.323871									0.337432						0.370206
MIMAT0016847	miR-378c	Low					0.308693	-0.314933																-0.418299								0.462052
MIMAT0017988	miR-3611	Medium		0.746893												-0.364763																0.383752	-0.300001
MIMAT0017993	miR-3614-3p	Medium												0.465392			0.31826															0.471994	0.409432
MIMAT0018104	miR-3679-5p	Low	0.521523												0.710333									0.319559				-0.464893
MIMAT0019224	miR-3691-3p	Medium													0.953324	-0.788419									0.321498							0.518891
MIMAT0018188	miR-3914	Low													0.911306						-0.752042						-0.885748			-0.30311
MIMAT0019021	miR-4487	Low					-0.35461										-0.416304															0.534676	0.488379
MIMAT0019053	miR-4516	Medium					0.419307	0.321283											0.44433													0.616375
MIMAT0019701	miR-4641	Medium	0.999999															-0.595579	0.300212							-0.524802
MIMAT0019743	miR-4667-5p	Medium	-0.492383			-0.431238								0.773584			-0.990636
MIMAT0019747	miR-219b-5p	Medium		0.479092							-0.313484						-0.414331											-0.362007
MIMAT0019751	miR-4670-3p	Medium			0.965967			0.436645																				-0.427641				0.303019
MIMAT0019755	miR-4673	Medium						0.319274															-0.840006	-0.90128	0.342916
MIMAT0019761	miR-4677-3p	Low		0.416605										0.3966																		0.301056	-0.368573
MIMAT0019768	miR-4683	Low												0.420397			-0.718862						0.38077	-0.335725
MIMAT0019806	miR-4706	Low																						-0.703294			0.602277					0.7086	-0.643237
MIMAT0019828	miR-3529-5p	Medium			0.979465								0.615249														0.358037					0.385617
MIMAT0019902	miR-4757-3p	Low			-0.999337																			-0.946631						0.875077				-0.521476
MIMAT0019916	miR-4765	Medium					0.990023											-0.998767						-0.99792									-0.999602
MIMAT0019917	miR-4766-5p	Medium												0.692051														-0.337307				0.317899	-0.351359
MIMAT0019939	miR-4780	Medium													0.964505			-0.544204								-0.324141					-0.351388
MIMAT0019970	miR-4796-5p	Low			-0.42811									0.399691										-0.408405									-0.33303
MIMAT0019983	miR-4803	Medium									-0.711886								0.309026													0.524237			-0.91504
MIMAT0022258	miR-5571-3p	Low																				0.342384					0.96241					0.429546	0.606655
MIMAT0022303	miR-548av-5p	Medium								-0.441625									0.481821			-0.405385											-0.43641
MIMAT0022473	miR-5684	Low				-0.428295													0.306177					-0.695547		-0.302278
MIMAT0027356	miR-6727-3p	Low					0.402283						0.420971																			0.90405			-0.957715
MIMAT0027359	miR-6729-5p	Medium						0.310711							0.814766					0.351664														-0.338997
MIMAT0027373	miR-6736-5p	Low				-0.345331													0.38721													0.455289		-0.410668
MIMAT0027383	miR-6741-5p	Medium																	0.439179	0.334103	0.399167											0.655366
MIMAT0027423	miR-6761-3p	Low									-0.510148						-0.695412											-0.321079				0.389125
MIMAT0027499	miR-6799-3p	Low							-0.473092										0.398547		-0.388813				0.305296
MIMAT0027501	miR-6800-3p	Low																								0.816572			-0.966337	0.855612		0.497265
MIMAT0027518	miR-6809-5p	Low							-0.967164				-0.920343														0.48058					0.562182
MIMAT0027565	miR-6832-3p	Medium								-0.370083								-0.348669										-0.531516		-0.458836
MIMAT0027573	miR-6780b-3p	Low														-0.414563							-0.848622	-0.424841				-0.527589
MIMAT0027579	miR-6838-3p	Medium			-0.997122												-0.531677															0.606218	-0.392395
MIMAT0027594	miR-6847-5p	Low				-0.342918												-0.3901										-0.785619					-0.505921
MIMAT0027621	miR-6769b-3p	Medium											0.374605				-0.606162		0.51279									-0.812155
MIMAT0027633	miR-6866-3p	Medium													0.420893			-0.430026									-0.492802	-0.56681
MIMAT0027651	miR-6875-3p	Medium						0.368184	0.602594										0.357107													0.501535
MIMAT0027661	miR-6880-3p	Low								-0.522656																						0.430743	0.402591		0.76971
MIMAT0027680	miR-6890-5p	Low								-0.59445	-0.87702																	-0.910514				0.650771
MIMAT0027684	miR-6892-5p	Low		0.491494										0.459777					0.306865					0.359056
MIMAT0028118	miR-7110-3p	Low									-0.374245			0.589034																		0.347606	-0.390477
MIMAT0028123	miR-7113-5p	Low		0.750462						-0.417829																						0.372256			-0.503582
MIMAT0028126	miR-7114-3p	Low				-0.48263											-0.998222							-0.454228									-0.677734
MIMAT0030416	miR-1273h-3p	Medium																						-0.515183				-0.5673				0.378226	-0.33775
MIMAT0030999	miR-8072	Low			0.678877																		-0.684267	0.394004								0.334536
MIMAT0010195	let-7a-2-3p	Low		0.552038		0.350226																										-0.453756
MIMAT0026472	let-7c-3p	Medium			0.340277			-0.316414																								-0.468928
MIMAT0000073	miR-19a-3p	Medium																							-0.301079		0.376854					0.344565
MIMAT0004492	miR-19b-2-5p	Low							-0.997145																							0.425787	-0.411485
MIMAT0000075	miR-20a-5p	High		0.388011																							0.322964					0.31049
MIMAT0000077	miR-22-3p	Medium	0.386485						0.314271																					0.336615
MIMAT0000093	miR-93-5p	Medium		0.353342		-0.348958											-0.388765
MIMAT0026473	miR-95-5p	Low		0.475726																0.352425															-0.557755
MIMAT0000099	miR-101-3p	Medium													-0.319503		-0.433004															0.309744
MIMAT0004517	miR-106a-3p	Medium																									-0.341697		-0.627014				-0.347104
MIMAT0004518	miR-16-2-3p	Medium													0.301923				0.302694													0.500917
MIMAT0000244	miR-30c-5p	Medium												-0.430677			-0.305862																	-0.377545
MIMAT0004551	miR-30d-3p	Low				-0.37467									-0.336128	-0.338053
MIMAT0004552	miR-139-3p	Medium					0.415369							0.356415														0.304883
MIMAT0004556	miR-10b-3p	Medium		-0.338159		-0.300392																				0.329466
MIMAT0004558	miR-181a-2-3p	Medium																						-0.37148								-0.494103	-0.364107
MIMAT0000257	miR-181b-5p	Medium																						-0.369181								-0.526551	-0.330846
MIMAT0004561	miR-187-5p	Low														0.5139											0.945461					0.341544
MIMAT0000267	miR-210-3p	Medium				-0.326702																	-0.383545			-0.327719
MIMAT0000272	miR-215-5p	Medium																	0.346964							-0.312142						-0.378653
MIMAT0004566	miR-218-2-3p	Low				-0.395843				-0.366604													0.525841
MIMAT0004571	miR-200b-5p	Medium				-0.553428					-0.315826															-0.426543
MIMAT0000419	miR-27b-3p	Medium													-0.363281																	-0.49749	0.318702
MIMAT0000423	miR-125b-5p	Medium				0.473742											-0.325721															-0.489202
MIMAT0000425	miR-130a-3p	Medium												0.34761										-0.345205			0.34628
MIMAT0000429	miR-137	High														0.556228																-0.385352	0.354732
MIMAT0000430	miR-138-5p	Medium	0.385402														-0.404065	0.323044
MIMAT0000440	miR-191-5p	Medium				-0.422178											-0.427031							-0.352941
MIMAT0001618	miR-191-3p	Low				-0.456432											-0.346259							-0.357021
MIMAT0000442	miR-9-3p	Low													0.342489									0.333608	-0.305281
MIMAT0004606	miR-136-3p	Low												0.433519		0.325584																		0.471906
MIMAT0000452	miR-154-5p	High												0.472696		0.344261																		0.402281
MIMAT0000455	miR-185-5p	Medium																					0.37186							0.332368		0.43429
MIMAT0004614	miR-193a-5p	Medium												0.417865			-0.300084															-0.301094
MIMAT0000461	miR-195-5p	Medium												0.316345													0.37906					0.312968
MIMAT0000680	miR-106b-5p	High				-0.337838											-0.383515										0.301692
MIMAT0004673	miR-29c-5p	Low				-0.370797											-0.491462																	-0.351072
MIMAT0002890	miR-299-5p	Low				0.30355								0.416028																				0.339096
MIMAT0000688	miR-301a-3p	Medium												0.350162											-0.335581							-0.484047
MIMAT0000703	miR-361-5p	Medium				-0.380258											-0.387329															-0.326529
MIMAT0000707	miR-363-3p	Medium																					0.340453			0.301074						-0.326812
MIMAT0000720	miR-376c-3p	High												0.498135		0.375283																		0.42464
MIMAT0000722	miR-370-3p	Medium												0.415388										0.374287										0.367716
MIMAT0004687	miR-371a-5p	High																												-0.506234		0.751184		-0.34345
MIMAT0004689	miR-377-5p	Medium												0.607593										0.332										0.329121
MIMAT0022697	miR-382-3p	Medium												0.503006		0.328858																		0.303206
MIMAT0004694	miR-342-5p	Medium												0.327705			-0.435342							0.315545
MIMAT0000757	miR-151a-3p	Medium	0.355514			-0.429364											-0.387921
MIMAT0000760	miR-331-3p	Medium				-0.301964											-0.460057															-0.324527
MIMAT0000761	miR-324-5p	Medium												0.311463			-0.497617															-0.519499
MIMAT0000770	miR-133b	Medium				0.347544																					0.356908					-0.590647
MIMAT0000773	miR-346	Medium		-0.306746																										-0.310226		-0.301006
MIMAT0001340	miR-423-3p	Medium				-0.305115											-0.438549																	-0.315096
MIMAT0003393	miR-425-5p	Medium			0.398562										0.439111								0.43811
MIMAT0001412	miR-18b-5p	Medium																					0.341826	0.651712									-0.360378
MIMAT0001541	miR-449a	Medium		0.552066																						-0.34628						-0.350122
MIMAT0026554	miR-433-5p	Low							-0.428691													0.329725										-0.313054
MIMAT0001627	miR-433-3p	Medium												0.420444		0.335449																-0.324422
MIMAT0001638	miR-409-5p	Medium												0.424183										0.340057										0.402992
MIMAT0026557	miR-412-5p	Low												0.387963		0.412934								0.346732
MIMAT0002171	miR-410-3p	Very High												0.491684		0.452178																		0.44152
MIMAT0004761	miR-483-5p	Medium																								0.305604						-0.366009	0.354762
MIMAT0002806	miR-490-3p	Low	-0.484675			0.351274																										-0.460721
MIMAT0002811	miR-202-3p	High		-0.450561		-0.376046			-0.505975
MIMAT0003161	miR-493-3p	Medium												0.409662		0.384266																		0.40705
MIMAT0002815	miR-432-3p	Medium							-0.424503					0.81235																				-0.49458
MIMAT0002820	miR-497-5p	Medium												0.319203			-0.504877										0.351418
MIMAT0002823	miR-512-3p	Medium												0.500512		0.568022																0.621369
MIMAT0002824	miR-498	High														0.785068														-0.505302		0.505665
MIMAT0002829	miR-519e-3p	Medium															0.960463							0.998295								0.337729
MIMAT0002830	miR-520f-3p	Medium			0.932608											0.55949																0.615544
MIMAT0002839	miR-525-3p	Medium														0.745891														-0.406356		0.375212
MIMAT0002841	miR-518f-5p	Medium												0.58443		0.509952																0.561955
MIMAT0002848	miR-518c-3p	Medium														0.651605	-0.518942															0.424614
MIMAT0002849	miR-524-5p	Medium														0.767134									0.467351							0.427636
MIMAT0002854	miR-521	Medium														0.747998														-0.552286				-0.41997
MIMAT0002855	miR-520d-5p	Medium									-0.709959					0.771638																0.343742
MIMAT0002856	miR-520d-3p	Medium			-0.760575											0.711011																0.502675
MIMAT0002861	miR-518e-3p	Medium														0.505309														-0.313912		0.510081
MIMAT0005457	miR-518a-5p	Medium									-0.417007					0.906261																0.447521
MIMAT0002863	miR-518a-3p	Medium														0.711354														-0.426409		0.485922
MIMAT0002867	miR-520h	Medium			0.782019																							0.504102				0.484055
MIMAT0002868	miR-522-3p	Medium														0.806357																0.353595		-0.333548
MIMAT0004774	miR-501-3p	Medium																					0.309422	0.33526								-0.32921
MIMAT0002877	miR-513a-5p	Medium	0.927627				0.410131																	-0.537269
MIMAT0022702	miR-514a-5p	Medium					0.324982												0.379199					-0.435017
MIMAT0003163	miR-539-5p	Medium												0.397481		0.342927								0.350979
MIMAT0003237	miR-572	Medium											0.397776					0.56346														0.451842
MIMAT0003239	miR-574-3p	High															-0.519519															-0.469524	0.347042
MIMAT0003241	miR-576-5p	Medium												0.367102																			-0.306241		-0.356657
MIMAT0026616	miR-579-5p	Low		0.339635																												0.47181	-0.309892
MIMAT0022708	miR-584-3p	Low													0.377738													-0.509647				0.346445
MIMAT0004798	miR-548b-5p	High		0.7962													0.850396											-0.364214
MIMAT0003257	miR-550a-3p	Medium		0.404223											0.303821																	0.42843
MIMAT0004801	miR-590-3p	Medium															-0.310329								-0.513461							0.476725
MIMAT0026620	miR-598-5p	Low											0.324737					-0.620213														0.449877
MIMAT0003287	miR-618	Medium															0.345705						0.314511									-0.324607
MIMAT0003293	miR-624-5p	Low		0.300224																							0.306043					0.421311
MIMAT0026623	miR-627-3p	Medium		0.688347																												0.365739			-0.382373
MIMAT0003309	miR-639	Medium															-0.393007															0.354583	-0.387627
MIMAT0003311	miR-641	Medium																									0.411396					0.469673	-0.318107
MIMAT0020924	miR-642a-3p	Low			-0.891528																											0.319202	0.615708
MIMAT0003321	miR-651-5p	Low				-0.319066																										0.333706	-0.318164
MIMAT0003323	miR-548d-3p	High		0.522609															0.343722														-0.441115
MIMAT0003326	miR-663a	Medium												-0.507572									0.450312									0.369196
MIMAT0009203	miR-449b-3p	Medium																												-0.345377		-0.323282	0.469343
MIMAT0003329	miR-411-5p	Medium												0.507448		0.411448																		0.483798
MIMAT0004813	miR-411-3p	Medium												0.584387		0.315802																		0.325109
MIMAT0004814	miR-654-3p	Medium												0.430916		0.399873																		0.483676
MIMAT0003337	miR-659-3p	Medium																										-0.628203			-0.409764	0.395855
MIMAT0003879	miR-758-3p	Low												0.514733		0.404407																		0.441315
MIMAT0004819	miR-671-3p	Medium				-0.312585											-0.325175																-0.379709
MIMAT0003882	miR-767-5p	Medium												0.698904		0.342392																0.314786
MIMAT0003883	miR-767-3p	Medium							0.318223																		0.398755					0.344122
MIMAT0005795	miR-1323	High														0.546276														-0.303237		0.509912
MIMAT0022714	miR-766-5p	Medium																						0.434477						-0.380609			-0.361772
MIMAT0004902	miR-891a-5p	Medium		0.348429												0.345304								0.348482
MIMAT0004912	miR-890	Medium								0.565167								-0.999878																-0.441151
MIMAT0004920	miR-541-3p	Medium	-0.539831											0.590977										0.447833
MIMAT0004921	miR-889-3p	Medium												0.489068		0.397865																		0.43638
MIMAT0004923	miR-875-3p	Medium											-0.987427																			0.530921	-0.304186
MIMAT0004926	miR-708-5p	Medium			0.395973													0.393601						0.497199
MIMAT0004945	miR-744-5p	Medium															-0.471641															-0.475871	-0.312809
MIMAT0004946	miR-744-3p	Low															-0.401532															-0.358706	-0.357152
MIMAT0026720	miR-887-5p	Medium			-0.429949									0.443997										0.406003
MIMAT0004951	miR-887-3p	Medium												0.457377										0.384882								-0.399248
MIMAT0004953	miR-873-5p	Medium																						-0.302135										-0.314203	-0.317968
MIMAT0022717	miR-873-3p	Medium													0.655002											-0.315297								-0.322199
MIMAT0022942	miR-1229-5p	Low														-0.452067					-0.3634											0.541463
MIMAT0005592	miR-1237-3p	Medium								-0.303836							-0.693891											-0.414687
MIMAT0005876	miR-1285-3p	Medium																		0.431199						0.579534						0.392933
MIMAT0005878	miR-1287-5p	Medium				-0.349447								0.397751																		-0.353837
MIMAT0005883	miR-1293	Medium														0.360426		0.41039														0.393819
MIMAT0022720	miR-1304-3p	Low												0.372954										-0.300801			0.495208
MIMAT0005895	miR-548f-3p	Medium													0.389659																	0.559657	0.336942
MIMAT0005921	miR-1267	Low																								0.813778		-0.571355				0.315876
MIMAT0005924	miR-1270	Medium																						-0.445256						-0.336399		0.373132
MIMAT0026744	miR-1252-3p	Medium				-0.38252															0.406015											0.579392
MIMAT0005948	miR-664a-5p	Medium															-0.333253															-0.385803		-0.325358
MIMAT0005949	miR-664a-3p	Medium				-0.317316											-0.448972															-0.31078
MIMAT0005953	miR-1322	Medium					0.612313															0.4085							0.976994
MIMAT0007399	miR-1537-3p	Medium													0.584676				0.420697					-0.508579
MIMAT0007885	miR-1911-5p	Medium							-0.354262															0.431994									0.622957
MIMAT0011161	miR-2116-3p	Low		0.419914													-0.46314							-0.391605
MIMAT0014987	miR-548s	Medium												0.308037										-0.370672								0.358951
MIMAT0019202	miR-3129-3p	Medium		0.488826										0.90904					0.346096
MIMAT0014999	miR-378b	Low												0.901634						0.375464												0.306107
MIMAT0015006	miR-3138	Medium									-0.52495																0.805166					0.451921
MIMAT0015012	miR-3143	Medium									-0.361335			0.956258	0.725551
MIMAT0015024	miR-3151-5p	Low								0.77893								0.327452														0.582573
MIMAT0019208	miR-3074-5p	Medium								-0.327049						-0.300401																-0.537208
MIMAT0019211	miR-3158-5p	Medium		0.426798													-0.738738											-0.345161
MIMAT0015036	miR-3162-5p	Low									-0.672925												-0.95968										-0.703051
MIMAT0015037	miR-3163	High				0.422262							-0.410126							0.336672
MIMAT0015039	miR-3165	Medium		0.967266							-0.785526														0.967455
MIMAT0015041	miR-1260b	Medium		0.892965										0.520023																		0.341465
MIMAT0015046	miR-3171	Low													0.998732										-0.971366								0.411353
MIMAT0019214	miR-3173-5p	Low		0.303047										0.390968			-0.440323
MIMAT0015048	miR-3173-3p	Medium																							0.454722							0.452218		-0.392449
MIMAT0015051	miR-3174	Medium		0.898007	-0.651589																											0.397017
MIMAT0015052	miR-3175	Medium			-0.999985															-0.329411												0.441149
MIMAT0019215	miR-3177-5p	Low								-0.488404															0.405308			-0.831743
MIMAT0015378	miR-3065-3p	Medium													-0.31174												-0.306097					-0.317454
MIMAT0015069	miR-3187-3p	Medium																						0.357128				-0.328228				-0.34834
MIMAT0015071	miR-3189-3p	Medium											-0.41201	0.403512																		0.340053
MIMAT0015077	miR-3193	Low	-0.744662			-0.370538											-0.836236
MIMAT0015089	miR-3202	Medium																-0.354709		-0.311929	-0.405249
MIMAT0017982	miR-3605-3p	Low															-0.325528															-0.506126		-0.317795
MIMAT0017996	miR-3616-3p	Low							-0.433955								0.931995									-0.363507
MIMAT0017999	miR-3619-5p	Medium																						-0.747315				-0.446845				0.663256
MIMAT0022967	miR-3620-5p	Low															-0.658575																-0.335774	-0.311039
MIMAT0018083	miR-3662	Medium		0.317138																												0.54346	-0.313892
MIMAT0018180	miR-3689b-5p	Low																		0.587951												0.999297			0.822594
MIMAT0018183	miR-3909	Low		0.319479													-0.415642																-0.32408
MIMAT0018194	miR-3150b-3p	Low		0.858034															0.346													0.354542
MIMAT0018195	miR-3920	Medium																												-0.402668		0.338305			-0.379832
MIMAT0018200	miR-3925-5p	High	0.999552	-0.896316																0.337897
MIMAT0018353	miR-3938	Medium																										-0.52341		0.768604		0.345386
MIMAT0018355	miR-3939	Low																								0.698827				-0.358997		0.340403
MIMAT0018356	miR-3940-3p	Low			-0.485406																											0.385341	-0.331421
MIMAT0019230	miR-3942-3p	Medium																-0.376611		0.3211												0.325793
MIMAT0022736	miR-642b-5p	Low		0.675736																			0.600746									0.666688
MIMAT0018445	miR-550b-3p	Low																	0.454073			-0.629973							0.68658
MIMAT0018925	miR-1268b	Low												-0.308952														-0.316886				0.400018
MIMAT0018934	miR-4421	Medium																	0.349146													0.980349		-0.610328
MIMAT0018944	miR-4429	Low					-0.349955						-0.344305							0.324033
MIMAT0019233	miR-4446-5p	Low				-0.319336													0.332672												-0.520838
MIMAT0018969	miR-548ag	Medium																	0.498068	-0.461345										-0.437486
MIMAT0018973	miR-4451	Medium				-0.873834								0.86878																-0.701344
MIMAT0018976	miR-4454	Low												0.492833																		0.36449	-0.325394
MIMAT0018992	miR-4465	Medium				-0.543964									-0.984043						-0.477771
MIMAT0019022	miR-4488	Low				-0.437403	0.45352																	-0.469578
MIMAT0019038	miR-4502	Low	0.975888																											-0.998247			-0.998117
MIMAT0019058	miR-4521	Low		0.323596		-0.390835								0.423702
MIMAT0019060	miR-4522	Low	0.56275																									-0.322854					-0.381436
MIMAT0019064	miR-4525	Low							0.450929																						0.370811	0.613106
MIMAT0019074	miR-378i	Low		0.951946																				-0.320246								0.323935
MIMAT0019694	miR-4637	Medium		-0.980183		-0.580344																			0.96228
MIMAT0019717	miR-4652-3p	Medium																-0.400279														0.317573	-0.428716
MIMAT0019720	miR-4654	Medium				-0.311408																				-0.556083						0.376921
MIMAT0019725	miR-4658	Low													0.371949		-0.454215															0.390097
MIMAT0019727	miR-4659a-3p	Low		0.992822																	-0.355593											0.404994
MIMAT0019738	miR-4664-3p	Low		0.56932													0.557301		0.43477
MIMAT0019745	miR-4668-5p	Low															-0.830928			0.999888							0.808659
MIMAT0019746	miR-4668-3p	Medium	0.308233		0.43165									0.313858
MIMAT0019749	miR-4669	Medium																-0.343053			-0.470909				0.300309
MIMAT0019757	miR-4675	Low													0.999913										0.615344							0.763757
MIMAT0019764	miR-4680-5p	Medium																							-0.498273							0.327158			0.847991
MIMAT0019766	miR-4681	Low																			0.969341											0.995332	0.865767
MIMAT0019771	miR-4685-5p	Medium								-0.756639							-0.999906															0.549229
MIMAT0019775	miR-4687-3p	Low													0.92151																	0.339138	-0.349401
MIMAT0019795	miR-4699-3p	Medium			0.864064																								0.752243				-0.456935
MIMAT0019798	miR-4701-5p	Medium																0.338875										-0.51279				0.485251
MIMAT0019802	miR-4703-3p	Low																		0.301785			0.69762			0.735199
MIMAT0019809	miR-4708-5p	Medium				-0.373302												0.963478														0.409711
MIMAT0019818	miR-4712-5p	Medium														0.896959			0.870965									-0.681068
MIMAT0019819	miR-4712-3p	Medium																0.634099							0.611407								-0.535848
MIMAT0019821	miR-4713-3p	Low														0.999722		-0.618018				0.559386
MIMAT0019824	miR-4715-5p	Medium					-0.311795																		0.58761	-0.466821
MIMAT0019829	miR-4717-5p	Low														0.86297					-0.569806											0.667777
MIMAT0020300	miR-4520-2-3p	Medium				-0.332034	-0.532887																					-0.734987
MIMAT0019844	miR-4725-3p	Low		0.563966										0.830203					0.379199
MIMAT0019845	miR-4726-5p	Medium			0.748289									0.52461														-0.321225
MIMAT0019846	miR-4726-3p	Medium		0.599216													0.898515															0.551952
MIMAT0019853	miR-4731-5p	Medium																	0.397134		-0.536587											0.565028
MIMAT0019868	miR-4739	Low															-0.723528						-0.991019									0.343657
MIMAT0019875	miR-4744	Medium						-0.610457																				-0.481396				0.36762
MIMAT0019878	miR-4745-5p	Low													0.712434	0.387752		-0.33823
MIMAT0019885	miR-4749-5p	Low	-0.661683																													0.347631		-0.349658
MIMAT0019888	miR-4751	Low			-0.998569										-0.813315																	0.704694
MIMAT0019889	miR-4752	Medium													0.603536	-0.412896													0.669231
MIMAT0019892	miR-371b-5p	Medium			-0.914443										0.524009		0.654832
MIMAT0019895	miR-4755-5p	Low		0.897582													-0.578808		0.432458
MIMAT0019935	miR-4777-3p	Medium		0.558044															0.355385													0.322682
MIMAT0019960	miR-4789-3p	Medium									-0.585935								0.402761															-0.300538
MIMAT0019962	miR-4790-3p	Medium								-0.927543										0.950799							-0.542809
MIMAT0019973	miR-4797-3p	Medium																						-0.382627								0.332858	-0.38929
MIMAT0021019	miR-5000-5p	Low									0.720367					-0.337087		-0.300224
MIMAT0021041	miR-5009-5p	Low								-0.378103																		-0.556142				0.351277
MIMAT0021080	miR-5088-5p	Medium						0.477488																				-0.638319					0.803522
MIMAT0022984	miR-5089-3p	Low													-0.999074					0.997554								-0.925529
MIMAT0022269	miR-5579-5p	Medium														-0.447493														-0.499081		0.446706
MIMAT0022275	miR-5581-5p	Low					-0.310284												0.301137							-0.982597
MIMAT0022276	miR-5581-3p	Low		0.432001																				-0.347168					-0.302003
MIMAT0022483	miR-5691	Medium																-0.550525														0.39132		-0.373714
MIMAT0022488	miR-5695	Medium		0.39309							-0.378169																					-0.327381
MIMAT0022494	miR-5701	Medium				-0.348088								0.392885														-0.367167
MIMAT0023709	miR-6084	Low		-0.831282																							0.956465	-0.999054
MIMAT0024613	miR-6129	Medium								-0.68922						-0.433589												-0.316212
MIMAT0025453	miR-548ay-3p	Medium															-0.53366		0.313548													0.423963
MIMAT0025474	miR-6509-5p	Low																														0.471325	-0.305441		-0.319118
MIMAT0025486	miR-6515-5p	Medium																						-0.352826								0.386805		-0.321846
MIMAT0025841	miR-6715a-3p	Medium																						-0.342324								0.468133		-0.302891
MIMAT0025855	miR-6723-5p	Low									-0.401531						-0.551644							-0.37135
MIMAT0027358	miR-6728-3p	Low				0.961736													0.985869						-0.604448
MIMAT0027363	miR-6731-5p	Medium		0.974276										0.764524									-0.566896
MIMAT0027374	miR-6736-3p	Low													0.815492									0.956121										-0.328085
MIMAT0027386	miR-6742-3p	Low				-0.305244																						-0.357148				0.482836
MIMAT0027394	miR-6747-5p	Low														0.650094												-0.558745				0.576916
MIMAT0027397	miR-6748-3p	Low	-0.586498																									-0.318255		0.584459
MIMAT0027399	miR-6749-3p	Low									-0.621472																	-0.720299				0.334597
MIMAT0027400	miR-6750-5p	Medium	0.755174																		-0.383768											0.510277
MIMAT0027413	miR-6756-3p	Medium																		-0.382555								-0.54059				0.400599
MIMAT0027443	miR-6771-3p	Low	0.762868				-0.653854																0.813673
MIMAT0027451	miR-6775-3p	Low						0.330425								-0.59181										0.720801
MIMAT0027458	miR-6779-5p	Medium									-0.441568																					0.34057	0.327625
MIMAT0027475	miR-6787-3p	Medium		0.9513										0.958827																		0.669454
MIMAT0027478	miR-6789-5p	Low																		0.526884						-0.95115								-0.790198
MIMAT0027482	miR-6791-5p	Low									-0.969274								0.612237						0.309418
MIMAT0027490	miR-6795-5p	Low																0.879433	0.577185													0.639074
MIMAT0027493	miR-6796-3p	Medium								-0.522849								0.652857				0.388274
MIMAT0027504	miR-6802-5p	Low							-0.421145																0.418726								-0.336861
MIMAT0027508	miR-6804-5p	Low						0.345944									-0.985221													0.549139
MIMAT0027525	miR-6812-3p	Medium																										-0.628821	0.537052			0.58313
MIMAT0027528	miR-6814-5p	Low						0.5861							0.6515																				-0.998406
MIMAT0027539	miR-6819-3p	Low				-0.413842													0.736442									-0.738227
MIMAT0027553	miR-6826-3p	Low		0.741331																												0.423352		-0.311469
MIMAT0027566	miR-6833-5p	Low																		0.914191								-0.86113		-0.982968
MIMAT0027574	miR-6836-5p	Low				-0.496034												-0.590852														0.434674
MIMAT0027590	miR-6845-5p	Medium																-0.310506	0.392645		0.656574
MIMAT0027599	miR-6849-3p	Medium	0.547909															-0.485116														0.622347
MIMAT0027612	miR-6856-5p	Medium				0.426607			-0.785552																0.324669
MIMAT0027615	miR-6857-3p	Medium						0.651248																									-0.501417	-0.452432
MIMAT0027622	miR-6860	Medium						0.346259																				-0.413209				0.419405
MIMAT0027623	miR-6861-5p	Low				-0.914443											-0.999797										0.735331
MIMAT0027629	miR-6864-3p	Medium											0.99994																				-0.882594	-0.408914
MIMAT0027631	miR-6865-3p	Low								0.756358			-0.547897																			0.695574
MIMAT0027632	miR-6866-5p	Low									-0.839118										0.997261				0.789465
MIMAT0027639	miR-6869-3p	Low						0.583927																			0.866374					-0.853986
MIMAT0027640	miR-6870-5p	Medium		0.899065									0.448861																	0.971688
MIMAT0027647	miR-6873-3p	Medium			0.982941																							-0.367824				0.322168
MIMAT0027656	miR-6878-5p	Low																		-0.3265										-0.335055		0.380671
MIMAT0027669	miR-6884-3p	Low												0.997851																		0.422053			-0.915525
MIMAT0028117	miR-7110-5p	Low																										-0.653444			-0.383776	0.670023
MIMAT0028213	miR-7151-3p	Low																				0.412943										0.466227	0.971176
MIMAT0028214	miR-7152-5p	Low				-0.312442																0.320126					0.42028
MIMAT0028215	miR-7152-3p	Low								-0.430556																	0.422013		-0.994168
MIMAT0028220	miR-7155-5p	Low		0.553991										-0.506234																		0.357737
MIMAT0028223	miR-7156-3p	Medium																			-0.605589									0.622394		0.835005
MIMAT0028232	miR-7161-5p	Low				-0.507237																											0.929922	-0.482565
MIMAT0030019	miR-7704	Low												0.445944										-0.350786								0.328983
MIMAT0030021	miR-7706	Low				-0.424264																										-0.319917	-0.312618
MIMAT0030425	miR-7850-5p	Medium																	0.419432			0.345786					-0.756971
MIMAT0030426	miR-7851-3p	Low												0.999744																-0.938677		0.416427
MIMAT0031180	miR-7977	Low				-0.670835																				-0.740304					0.731472
MIMAT0031181	miR-7978	Low																										-0.999917				0.415885		-0.555271
MIMAT0004482	let-7b-3p	Medium																						0.320044	0.309705
MIMAT0004485	let-7e-3p	Low																0.338883														-0.513661
MIMAT0000070	miR-17-5p	High		0.470974																							0.317404
MIMAT0000071	miR-17-3p	Medium																						-0.32708									-0.302945
MIMAT0004490	miR-19a-5p	Low																-0.350132	0.325931
MIMAT0004491	miR-19b-1-5p	Medium																														0.548511	-0.379453
MIMAT0004493	miR-20a-3p	Medium		0.35505																													-0.303638
MIMAT0004498	miR-25-5p	Low																														0.610152	-0.382313
MIMAT0000081	miR-25-3p	Medium															-0.410037															0.420668
MIMAT0000083	miR-26b-5p	Very High												0.515979																		-0.328097
MIMAT0004503	miR-29a-5p	Low																					-0.337006									0.312604
MIMAT0000089	miR-31-5p	Medium		0.729179																				0.362425
MIMAT0000091	miR-33a-5p	Medium				-0.318102											-0.430107
MIMAT0004506	miR-33a-3p	High				-0.361734											-0.481648
MIMAT0004507	miR-92a-1-5p	Low																					0.314958									0.619154
MIMAT0000092	miR-92a-3p	Medium																						-0.342994								0.307451
MIMAT0004508	miR-92a-2-5p	Low	-0.340681											0.999052
MIMAT0004509	miR-93-3p	Medium				-0.360763											-0.505705
MIMAT0004515	miR-29b-2-5p	Medium				-0.378765											-0.327264
MIMAT0004543	miR-192-3p	Medium			-0.354762																					-0.480819
MIMAT0022691	miR-197-5p	Medium																										-0.336792				0.307264
MIMAT0004549	miR-148a-5p	Medium		-0.329507																												0.435894
MIMAT0000250	miR-139-5p	Medium					0.426131							0.308572
MIMAT0004554	miR-7-2-3p	Medium															-0.666396										-0.336932
MIMAT0000254	miR-10b-5p	Medium			0.36255																					0.333148
MIMAT0000258	miR-181c-5p	Medium															-0.368867															-0.312942
MIMAT0004559	miR-181c-3p	Low												0.340614			-0.533034
MIMAT0000260	miR-182-3p	Medium																								-0.432257						0.410297
MIMAT0004560	miR-183-3p	Medium																									-0.496415					0.517916
MIMAT0000266	miR-205-5p	Low		0.881344										0.302071
MIMAT0026475	miR-210-5p	Low				-0.306885																										0.305965
MIMAT0026476	miR-215-3p	Low									-0.420512																					-0.304565
MIMAT0004568	miR-221-5p	Medium																						-0.350101			0.388682
MIMAT0000414	let-7g-5p	Very High				-0.315123																		-0.397414
MIMAT0004584	let-7g-3p	Low				-0.333258											-0.386423
MIMAT0000417	miR-15b-5p	Medium															-0.393689																-0.411542
MIMAT0004586	miR-15b-3p	Low															-0.337079																-0.322179
MIMAT0004588	miR-27b-5p	Medium													-0.390722									0.331599
MIMAT0004589	miR-30b-3p	Medium				-0.3823											-0.329267
MIMAT0000421	miR-122-5p	Medium																							0.340591		0.350206
MIMAT0004590	miR-122-3p	Low					0.926624		-0.93235
MIMAT0004591	miR-124-5p	Medium																															-0.92312		0.724842
MIMAT0000422	miR-124-3p	Low				-0.324506								0.863521
MIMAT0004592	miR-125b-1-3p	Medium																								0.332067						-0.474348
MIMAT0000424	miR-128-3p	High															-0.384994																-0.348563
MIMAT0000428	miR-135a-5p	Medium																						0.407938								-0.417015
MIMAT0000431	miR-140-5p	Medium															-0.50612							-0.40418
MIMAT0026479	miR-152-5p	Low												0.449104																		-0.311659
MIMAT0000439	miR-153-3p	Very High																						-0.537915											-0.315545
MIMAT0004602	miR-125a-3p	Medium						0.30851						0.323838
MIMAT0000448	miR-136-5p	High												0.433869																				0.449587
MIMAT0000454	miR-184	Medium			0.37845												-0.415586
MIMAT0000457	miR-188-5p	Medium																						0.327755									0.321247
MIMAT0004615	miR-195-3p	Medium																								0.342204						0.338962
MIMAT0004671	miR-194-3p	Medium			-0.345279																					-0.38793
MIMAT0004672	miR-106b-3p	Low															-0.428492										0.300484
MIMAT0000683	miR-302a-5p	High													0.92861																	0.427895
MIMAT0000684	miR-302a-3p	Medium																										-0.922155				0.438891
MIMAT0000685	miR-34b-5p	Medium												0.414572	0.339307
MIMAT0004676	miR-34b-3p	Low												0.330243	0.340934
MIMAT0000687	miR-299-3p	Medium												0.630368																		0.398943
MIMAT0022696	miR-301a-5p	Medium												0.435059																		-0.42488
MIMAT0000689	miR-99b-5p	Medium																														-0.454514		-0.317664
MIMAT0004678	miR-99b-3p	Low												0.337153																		-0.390097
MIMAT0004679	miR-296-3p	Medium												0.412418			-0.379107
MIMAT0004681	miR-26a-2-3p	Medium			0.34354																				-0.329932
MIMAT0000705	miR-362-5p	Medium																											-0.306727			-0.31036
MIMAT0009199	miR-365a-5p	Low	-0.374775																													0.466335
MIMAT0000715	miR-302b-3p	Medium																										-0.820722				0.473665
MIMAT0000717	miR-302c-3p	Medium																	0.325487													0.303693
MIMAT0000718	miR-302d-3p	Medium											0.826787																			0.450025
MIMAT0000719	miR-367-3p	Medium																	0.635796													0.313532
MIMAT0000724	miR-372-3p	Low														0.410926																0.714821
MIMAT0000734	miR-380-5p	Low												0.834712										0.428986
MIMAT0000750	miR-340-3p	Low		0.306412										0.303387
MIMAT0004693	miR-330-5p	Medium												0.403306										0.361265
MIMAT0000751	miR-330-3p	Medium															-0.313686																		-0.328485
MIMAT0000758	miR-135b-5p	Medium			0.373773																					-0.313814
MIMAT0000763	miR-338-3p	Medium												0.5078																		-0.517042
MIMAT0001080	miR-196b-5p	Medium																	0.371065													-0.346454
MIMAT0009201	miR-196b-3p	Low																								-0.465784							-0.412667
MIMAT0001341	miR-424-5p	Medium																0.373953									0.315079
MIMAT0001343	miR-425-3p	Low				-0.36781											-0.332082
MIMAT0004752	miR-20b-3p	Low								-0.305416																							-0.361627
MIMAT0001532	miR-448	Medium																								-0.997646		-0.686274
MIMAT0001545	miR-450a-5p	Medium																0.344801														-0.430659
MIMAT0022700	miR-450a-1-3p	Medium																										-0.326108				-0.416889
MIMAT0001625	miR-431-5p	Medium												0.411035		0.346254
MIMAT0001629	miR-329-3p	Medium												0.71806										0.57223
MIMAT0001636	miR-452-3p	Medium								0.360979						0.360556
MIMAT0002173	miR-483-3p	Medium																														-0.351389	0.384967
MIMAT0002174	miR-484	Medium												0.362316			-0.30935
MIMAT0026559	miR-487a-5p	Low			-0.382001									0.673777
MIMAT0002178	miR-487a-3p	Medium												0.745716		0.330457
MIMAT0002804	miR-488-5p	Low							-0.786138					0.72102
MIMAT0004763	miR-488-3p	Low									-0.441443														-0.439271
MIMAT0002805	miR-489-3p	Low												-0.341755															-0.37606
MIMAT0002816	miR-494-3p	Medium												0.688417		0.31095
MIMAT0004767	miR-193b-5p	Medium						0.312069																								0.409637
MIMAT0002821	miR-181d-5p	Medium															-0.301041															-0.351197
MIMAT0002822	miR-512-5p	High														0.769942																0.550014
MIMAT0002826	miR-515-5p	Medium														0.493073																0.509208
MIMAT0002833	miR-520a-5p	Medium														0.459313																0.62397
MIMAT0002834	miR-520a-3p	Medium														0.498204																0.58892
MIMAT0002835	miR-526b-5p	Medium														0.400034																0.557186
MIMAT0002837	miR-519b-3p	Medium															-0.577592															0.531428
MIMAT0002838	miR-525-5p	Medium														0.514909																0.49772
MIMAT0002840	miR-523-3p	Medium														0.806703																0.543938
MIMAT0002842	miR-518f-3p	Medium														0.730296																0.471217
MIMAT0002844	miR-518b	Medium														0.564024																0.560234
MIMAT0002847	miR-518c-5p	Medium														0.655231																0.592987
MIMAT0002853	miR-519d-3p	High														0.66318																0.54357
MIMAT0002858	miR-520g-3p	Medium																										0.386764				0.559077
MIMAT0002869	miR-519a-3p	Medium														0.688172																0.390644
MIMAT0004770	miR-516a-5p	Medium						0.328384																								0.372122
MIMAT0002871	miR-500a-3p	Low																					0.316898									-0.36299
MIMAT0002872	miR-501-5p	Medium																						0.303042								-0.30086
MIMAT0002874	miR-503-5p	Medium															0.460959															-0.360531
MIMAT0004777	miR-513a-3p	Medium													0.999274														0.997089
MIMAT0002878	miR-506-3p	Low	0.5723																					-0.53875
MIMAT0002888	miR-532-5p	Medium						-0.318376																								-0.370543
MIMAT0022928	miR-376a-2-5p	Medium														0.336854						0.353109
MIMAT0026615	miR-552-5p	Low				-0.305399																				-0.313988
MIMAT0003215	miR-552-3p	Medium												0.799774														-0.489725
MIMAT0003218	miR-92b-3p	Medium													0.446547			0.375398
MIMAT0004793	miR-556-3p	Medium																	0.302737																-0.301389
MIMAT0004794	miR-551b-5p	Medium				-0.318968							0.660873
MIMAT0003233	miR-551b-3p	Medium																												-0.315527		-0.389569
MIMAT0003235	miR-570-3p	Medium		0.431765																						-0.302125
MIMAT0003238	miR-573	Medium			0.999704																											0.43795
MIMAT0003242	miR-577	Medium												-0.358721																			0.444243
MIMAT0003243	miR-578	Low		0.737442											0.462119
MIMAT0003244	miR-579-3p	Medium																											0.411983			0.303334
MIMAT0026617	miR-580-5p	Low																	0.381393														-0.337158
MIMAT0003245	miR-580-3p	Medium																														0.370238	-0.326857
MIMAT0003249	miR-584-5p	Medium		0.4669																							0.313197
MIMAT0026618	miR-585-5p	Low																	0.355138													-0.366929
MIMAT0003260	miR-592	Medium							-0.316926															0.459683
MIMAT0003267	miR-599	Medium				-0.829764																						-0.776351
MIMAT0003268	miR-600	Medium						0.817126		0.607253
MIMAT0003271	miR-603	Medium																-0.539547														0.553958
MIMAT0003273	miR-605-5p	Medium																							0.322743							-0.31035
MIMAT0003275	miR-607	Medium																						0.50585								0.3766
MIMAT0003278	miR-610	Medium									-0.994807																						-0.55919
MIMAT0004804	miR-615-5p	Medium																														0.475507	0.746761
MIMAT0003284	miR-616-5p	Medium		0.314447																												0.492729
MIMAT0004805	miR-616-3p	Medium																														0.392159			-0.302774
MIMAT0003298	miR-629-3p	Medium		0.388163																												0.655706
MIMAT0003299	miR-630	Medium							0.854903																									0.99753
MIMAT0003312	miR-642a-5p	Medium															-0.394933															0.34386
MIMAT0003313	miR-643	Medium																														0.302118	-0.314466
MIMAT0003320	miR-650	Medium						-0.554622																										-0.612562
MIMAT0003325	miR-662	Medium						0.334384								-0.940596
MIMAT0003327	miR-449b-5p	Medium																											0.962558				0.484501
MIMAT0003328	miR-653-5p	Medium																	0.300523					0.330885
MIMAT0003331	miR-655-3p	Very High												0.468375																				0.376349
MIMAT0022710	miR-659-5p	Low				-0.338088																										0.309649
MIMAT0003340	miR-542-5p	Medium																0.316852														-0.475866
MIMAT0003389	miR-542-3p	Medium																0.331717														-0.490669
MIMAT0003881	miR-668-3p	Medium																												-0.352342		-0.372105
MIMAT0005459	miR-1224-3p	Medium																													0.484303	0.747524
MIMAT0010214	miR-151b	Medium															-0.404764							-0.42451
MIMAT0005792	miR-320b	Medium			-0.334571																														-0.379777
MIMAT0005793	miR-320c	Medium															-0.354393																		-0.329065
MIMAT0005794	miR-1296-5p	Medium															-0.328311							-0.462195
MIMAT0026637	miR-1296-3p	Medium																											0.789939			0.459008
MIMAT0010251	miR-449c-5p	Medium																												-0.369003		-0.46114
MIMAT0003887	miR-769-3p	Medium																														-0.428896			-0.331538
MIMAT0003888	miR-766-3p	Medium															-0.334536							0.427434
MIMAT0018926	miR-378d	Low																						-0.327082								0.319048
MIMAT0004185	miR-802	Medium								-0.582432			-0.986654
MIMAT0004284	miR-675-5p	Medium													0.529627														0.41766
MIMAT0004909	miR-450b-5p	Medium															0.346469															-0.458047
MIMAT0004913	miR-891b	Medium					0.466999						0.50647
MIMAT0004922	miR-875-5p	Medium																										-0.798704				0.457826
MIMAT0004925	miR-876-3p	Medium													0.548294																			-0.369821
MIMAT0004947	miR-885-5p	Medium												-0.340725									-0.321119
MIMAT0004952	miR-665	Medium												0.968374		0.392138
MIMAT0004954	miR-543	Medium												0.477572		0.4103
MIMAT0004956	miR-374b-3p	Low																							-0.371373							0.40678
MIMAT0026722	miR-208b-5p	Medium											0.475843															0.977056
MIMAT0004972	miR-922	Medium						0.96363																							-0.987414
MIMAT0004977	miR-934	Medium																				0.469513		0.999983
MIMAT0004979	miR-936	Medium				-0.607168																											0.765364
MIMAT0022938	miR-937-5p	Medium																	0.400894											-0.790516
MIMAT0004982	miR-939-5p	Medium		0.313235													-0.503749
MIMAT0026734	miR-942-3p	Low																														0.58013	-0.33302
MIMAT0004987	miR-944	Low													0.315822																	-0.372029
MIMAT0005825	miR-1180-3p	Medium														-0.355326																		-0.404667
MIMAT0005573	miR-1225-3p	Medium								-0.394099								-0.405035
MIMAT0005577	miR-1226-3p	Medium															-0.440527															-0.547695
MIMAT0022945	miR-1236-5p	Low																														0.443763		-0.361149
MIMAT0026736	miR-548e-5p	Medium																							0.575938							0.365762
MIMAT0005875	miR-548j-5p	Medium		0.367204																												0.458266
MIMAT0005891	miR-1303	Medium																		-0.596071															0.902751
MIMAT0005897	miR-1245a	Medium												0.999663														-0.333129
MIMAT0005901	miR-1249-3p	Medium												0.350065																				0.312698
MIMAT0026741	miR-1251-3p	Low																														-0.32003		-0.325246
MIMAT0005914	miR-1262	Medium																	0.328354													-0.437248
MIMAT0005920	miR-1266-5p	Medium			-0.371127																														-0.311585
MIMAT0005936	miR-1278	Medium																										-0.332254				0.352339
MIMAT0022948	miR-1292-3p	Low																														0.415649		-0.388756
MIMAT0005944	miR-1252-5p	High																			-0.595059									0.776453
MIMAT0005951	miR-1307-3p	Medium				-0.306654											-0.384667
MIMAT0005788	miR-513b-5p	Medium					0.350762																	-0.477073
MIMAT0005789	miR-513c-5p	Medium															0.653925							-0.512762
MIMAT0007400	miR-1538	Medium															-0.317341																-0.343801
MIMAT0007401	miR-1539	Medium								0.960199																							-0.655198
MIMAT0007884	miR-1910-5p	Medium			0.972256																			-0.376338
MIMAT0007890	miR-1914-3p	Medium																	0.432108													0.610159
MIMAT0011157	miR-2114-3p	Medium	0.837966			-0.402208
MIMAT0026921	miR-2276-5p	Low																						-0.479797								0.539828
MIMAT0011775	miR-2276-3p	Medium																														0.517188	-0.420678
MIMAT0013517	miR-2682-5p	Medium		0.630544																								-0.329853
MIMAT0013518	miR-2682-3p	Low		0.718523												0.987869
MIMAT0019200	miR-3124-3p	Medium		0.869018																								-0.309046
MIMAT0014992	miR-3129-5p	Low																	0.390364									-0.336567
MIMAT0014997	miR-3132	Medium																			0.801211										-0.685119
MIMAT0014998	miR-3133	Medium																														0.764485	-0.759923
MIMAT0015008	miR-3140-3p	Low																														0.495257	-0.30186
MIMAT0015009	miR-548t-5p	Medium								-0.308923																							-0.477418
MIMAT0015016	miR-3145-3p	Medium																										-0.460968				0.362626
MIMAT0015017	miR-1273c	Low				0.960658													0.700953
MIMAT0015020	miR-548v	Medium																						-0.480862											-0.409356
MIMAT0015021	miR-3148	Medium																				-0.305032			0.749746
MIMAT0015027	miR-3074-3p	Medium								-0.388785	-0.373766
MIMAT0015031	miR-3157-5p	Medium																										-0.361171				0.372591
MIMAT0015040	miR-3166	Low				-0.466799																												-0.349088
MIMAT0015045	miR-3170	Medium														-0.362327								-0.34712
MIMAT0015050	miR-323b-3p	Medium												0.435561										0.305513
MIMAT0015067	miR-3186-5p	Low													0.657227																		-0.481383
MIMAT0019216	miR-3187-5p	Medium		0.615075																								-0.302102
MIMAT0015070	miR-3188	Medium			-0.855498																							-0.305762
MIMAT0015072	miR-320e	Medium		0.635163				0.300674
MIMAT0015073	miR-3190-5p	Medium																											-0.382797			0.529955
MIMAT0022839	miR-3190-3p	#N/A		-0.678052				0.410007
MIMAT0015075	miR-3191-3p	Medium						0.380877																								0.509412
MIMAT0015082	miR-3197	Low								-0.419146					0.977202
MIMAT0015083	miR-3198	Medium															-0.517349							-0.355494
MIMAT0015085	miR-3200-3p	Low																														-0.435825		-0.419891
MIMAT0015087	miR-514b-5p	Medium					0.311915																	-0.509497
MIMAT0016884	miR-4254	Medium								-0.462971											-0.370799
MIMAT0016895	miR-2355-5p	Low		0.322155										0.424273
MIMAT0027032	miR-500b-3p	Medium															0.305434						0.309653
MIMAT0017986	miR-3609	Medium				-0.308006																										0.3698
MIMAT0017987	miR-3610	Low															-0.366355																-0.376113
MIMAT0017995	miR-3616-5p	Medium																							-0.776707					-0.448723
MIMAT0022966	miR-3617-3p	Medium																								-0.327422						0.359044
MIMAT0018000	miR-23c	Medium		0.391489	-0.393191
MIMAT0018006	miR-3622b-3p	Low							-0.800006		-0.998954
MIMAT0018068	miR-3648	Low																					0.358789									0.370483
MIMAT0018070	miR-3650	Low																	0.948439													0.646083
MIMAT0018073	miR-3653-3p	Medium																					0.307731									0.514134
MIMAT0018081	miR-3660	Medium																	0.336207							-0.856916
MIMAT0018082	miR-3661	Low				-0.376883																												-0.442196
MIMAT0018086	miR-3664-5p	Low																				-0.536563													-0.388938
MIMAT0019220	miR-3664-3p	Low		0.999477																						-0.545345
MIMAT0018089	miR-3667-5p	Low												0.818813			-0.330704
MIMAT0018098	miR-3675-5p	Medium						0.957233	-0.620902
MIMAT0018103	miR-3678-3p	Medium																						-0.788742								0.310643
MIMAT0018105	miR-3679-3p	Low									-0.330605																	-0.365792
MIMAT0019222	miR-3682-5p	Medium						0.8004					0.574915
MIMAT0018112	miR-3684	Low																														0.346592	-0.39025
MIMAT0018113	miR-3685	Low					-0.527771																						0.87202
MIMAT0018115	miR-3687	Low																					0.424491									0.38096
MIMAT0018116	miR-3688-3p	Low	0.303848																													0.36395
MIMAT0018117	miR-3689a-5p	Low																		0.751404	-0.436638
MIMAT0018184	miR-3910	Low		0.955512					-0.315249
MIMAT0018186	miR-3912-3p	Medium			-0.428702																				-0.393637
MIMAT0018187	miR-3913-5p	Medium				-0.313023																	-0.305195
MIMAT0018190	miR-3916	Medium																														0.390901		-0.311515
MIMAT0019226	miR-3150b-5p	Medium																			-0.560092								-0.583244
MIMAT0018197	miR-3922-3p	Low		0.354594																													-0.322196
MIMAT0018198	miR-3923	Low							-0.310639							0.446045
MIMAT0018203	miR-676-5p	Low			-0.527371																													-0.322587
MIMAT0022975	miR-3934-3p	Medium		0.37934																												0.336432
MIMAT0018352	miR-3937	Low																												-0.574508		0.325117
MIMAT0018358	miR-3942-5p	Medium		0.390805																												0.487228
MIMAT0019231	miR-3944-5p	Low																	0.391389				-0.995842
MIMAT0018360	miR-3944-3p	Low	-0.371527																																-0.383012
MIMAT0018443	miR-374c-5p	High		0.831945																												0.410736
MIMAT0022735	miR-374c-3p	Medium																												0.760273		0.766421
MIMAT0022737	miR-550b-2-5p	Medium																									-0.800008			-0.961954
MIMAT0018928	miR-548ab	Medium		0.784664														0.894612
MIMAT0018942	miR-4427	Medium																			0.673599											0.727867
MIMAT0018949	miR-4433a-3p	Medium				-0.442222																										0.341502
MIMAT0018960	miR-4442	Low															-0.526447							-0.352545
MIMAT0018961	miR-4443	Low												0.356166																		0.351295
MIMAT0018965	miR-4446-3p	Low	0.382123																											-0.64517
MIMAT0018968	miR-4449	Medium																					0.336245									0.338447
MIMAT0018975	miR-4453	Low		0.681441																							0.388024
MIMAT0018983	miR-4461	Medium																						-0.307507								0.358724
MIMAT0018984	miR-378h	Low																-0.999903													-0.957783
MIMAT0018996	miR-4469	Medium																						-0.324036				-0.308116
MIMAT0019000	miR-4473	Low																															-0.37667		-0.555928
MIMAT0019234	miR-4474-5p	Low																														0.718038		-0.438364
MIMAT0019006	miR-4478	Low						0.543795																				-0.38268
MIMAT0019010	miR-3689f	Low														0.999656														-0.568699
MIMAT0019019	miR-4485-3p	Low				-0.999964																												0.94104
MIMAT0019024	miR-548al	Low																										-0.648244				0.726584
MIMAT0019034	miR-4419b	Low																							-0.378606			-0.579049
MIMAT0019042	miR-4506	Low															-0.878634															0.822016
MIMAT0019047	miR-4510	Low																						-0.354618								-0.448006
MIMAT0019049	miR-4512	Low													-0.563157								0.96935
MIMAT0019054	miR-4517	Medium																										-0.386513				0.376447
MIMAT0019055	miR-4518	Low															0.473789															0.507764
MIMAT0019057	miR-4520-3p	Medium																										-0.753693				0.770579
MIMAT0019059	miR-1269b	Low																	0.494461													-0.369602
MIMAT0019062	miR-4524a-5p	Low																	0.727312															0.425908
MIMAT0019063	miR-4524a-3p	Medium		0.550726																								-0.31012
MIMAT0019236	miR-4529-5p	Medium								-0.999985									0.666086
MIMAT0019069	miR-4530	Medium																							0.729279						0.999974
MIMAT0019072	miR-4533	Medium			0.882964										0.437335
MIMAT0019076	miR-548am-3p	Medium																				0.82983											-0.988537
MIMAT0019078	miR-4536-5p	Medium																					0.661326									0.501618
MIMAT0019081	miR-4538	Low						0.934091	-0.998665
MIMAT0019688	miR-4632-3p	Low												0.63377																		0.341128
MIMAT0019690	miR-4633-3p	Low				-0.444287	-0.591881
MIMAT0019692	miR-4635	Low							-0.711681											0.489652
MIMAT0019697	miR-4639-5p	Medium																						-0.850913										-0.329417
MIMAT0019698	miR-4639-3p	Low	0.577256																														-0.580185
MIMAT0019709	miR-4647	Medium		0.687325															0.341307
MIMAT0019710	miR-4648	Low																-0.523714												-0.717266
MIMAT0019715	miR-4651	Medium																										-0.637843				0.54868
MIMAT0019716	miR-4652-5p	Low		-0.94086																												0.319199
MIMAT0019719	miR-4653-3p	Medium		0.997588														-0.498185
MIMAT0019723	miR-4656	Medium																														0.532926			0.999361
MIMAT0019728	miR-4660	Low			-0.410034																												-0.347693
MIMAT0019730	miR-4661-3p	Medium								-0.821445																					-0.703756
MIMAT0019732	miR-4662a-3p	Medium																				-0.958035												-0.957286
MIMAT0019733	miR-4659b-5p	Medium									-0.999921			-0.961479
MIMAT0019739	miR-4665-5p	Medium		0.533457																															-0.33168
MIMAT0019741	miR-4666a-5p	Medium																												-0.699216		0.34827
MIMAT0019754	miR-4672	Low				-0.839148																					-0.921362
MIMAT0019756	miR-4674	Medium		0.692683																												0.41339
MIMAT0019758	miR-4676-5p	Medium		0.429003																													-0.325786
MIMAT0019769	miR-4684-5p	Medium		0.750372																												0.471444
MIMAT0019774	miR-4687-5p	Low																					-0.619701					-0.472017
MIMAT0019777	miR-4688	Low				-0.580131																											0.814963
MIMAT0019780	miR-4690-3p	Low																	0.392918									-0.4719
MIMAT0019781	miR-4691-5p	Medium								-0.978165	-0.997144
MIMAT0019782	miR-4691-3p	Low															-0.564568											-0.3681
MIMAT0019789	miR-4695-3p	Low																						-0.649041				-0.962039
MIMAT0019807	miR-4707-5p	Medium		0.631958																								-0.399427
MIMAT0019808	miR-4707-3p	Medium		0.893895																												0.395471
MIMAT0019825	miR-4715-3p	Low																	0.968345													0.718801
MIMAT0019830	miR-4717-3p	Medium																										-0.533526				0.455882
MIMAT0019832	miR-4719	Medium																-0.481523														0.368738
MIMAT0019835	miR-4721	Low																			0.676535											0.64923
MIMAT0019848	miR-4727-3p	Low																					-0.909642		0.352823
MIMAT0019854	miR-4731-3p	Low				-0.454383					-0.985455
MIMAT0019866	miR-4738-5p	Low																														0.459937			0.905515
MIMAT0019867	miR-4738-3p	Medium									-0.573607												-0.501042
MIMAT0019873	miR-4742-3p	Medium															-0.399003															-0.351256
MIMAT0019874	miR-4743-5p	Low																										-0.57022						-0.331064
MIMAT0022978	miR-4743-3p	Medium				-0.562527																										0.697798
MIMAT0019879	miR-4745-3p	Low																										-0.574646		-0.319971
MIMAT0019882	miR-4747-5p	Low									-0.962899																						-0.710191
MIMAT0019884	miR-4748	Medium																						-0.475722								0.701104
MIMAT0019890	miR-4753-5p	Low		-0.905953																												0.327809
MIMAT0019898	miR-499b-3p	Low							-0.724547										0.592043
MIMAT0019900	miR-4756-3p	Medium																-0.339216			-0.390201
MIMAT0019901	miR-4757-5p	Low																										-0.422297	-0.63733
MIMAT0019904	miR-4758-3p	Low													0.318627				0.30014
MIMAT0019911	miR-4762-3p	Medium																											0.327229			0.440317
MIMAT0019924	miR-4770	Medium						-0.308838											0.418479
MIMAT0019929	miR-4774-5p	Medium							0.915856									0.912732
MIMAT0019930	miR-4774-3p	Low																							0.988299							0.842052
MIMAT0019934	miR-4777-5p	Low									-0.974474																							0.950687
MIMAT0019936	miR-4778-5p	Medium																													-0.675332	0.38459
MIMAT0019938	miR-4779	Medium																		0.669424													-0.472641
MIMAT0019942	miR-4781-5p	Medium																			-0.481794											0.692091
MIMAT0019943	miR-4781-3p	Low		0.349592										0.595298
MIMAT0019949	miR-4785	Low																	0.332905													0.409951
MIMAT0019951	miR-1245b-3p	Medium		-0.91776																												0.556063
MIMAT0019952	miR-2467-5p	Medium																-0.591713													0.605758
MIMAT0019956	miR-4787-5p	Low																		0.473735				-0.998438
MIMAT0019957	miR-4787-3p	Low															-0.383003															0.307505
MIMAT0019963	miR-4791	Medium																							-0.357439							0.427548
MIMAT0019967	miR-4794	Medium											0.731926																0.999064
MIMAT0019969	miR-4795-3p	Medium												-0.767865																		0.416153
MIMAT0019972	miR-4797-5p	Low																	0.708383														-0.830704
MIMAT0019982	miR-4802-3p	Medium																	0.499363							-0.472658
MIMAT0019984	miR-4804-5p	Low																			-0.997815	0.775954
MIMAT0019985	miR-4804-3p	Medium																										-0.367891				0.50588
MIMAT0021034	miR-5006-3p	Medium												0.958423																		0.709888
MIMAT0021040	miR-5008-3p	Medium																	0.620881													0.460851
MIMAT0021082	miR-5090	Low																					-0.327973									0.31363
MIMAT0021086	miR-5094	Medium																										-0.681827				0.300637
MIMAT0021118	miR-5187-3p	Medium																			0.47953											0.584604
MIMAT0027088	miR-5189-3p	Medium	0.842376																0.442622
MIMAT0022257	miR-5571-5p	Medium																				0.391986											0.546363
MIMAT0022259	miR-5100	Low																									0.829059				-0.695122
MIMAT0022263	miR-548aq-5p	Medium																											0.443647			0.318171
MIMAT0022278	miR-548at-3p	Medium																				-0.361906						-0.812093
MIMAT0022283	miR-5584-5p	Medium													0.417685														0.903889
MIMAT0022285	miR-5585-5p	Medium	-0.999151																0.590949
MIMAT0022288	miR-5586-3p	Medium																										-0.477749				0.437036
MIMAT0022290	miR-5587-3p	Low																0.903062									-0.668267
MIMAT0022292	miR-548au-3p	Medium																														0.478565	-0.372357
MIMAT0022293	miR-1295b-5p	Low													0.374457																	0.438052
MIMAT0022470	miR-5682	Low								0.734969																								-0.336283
MIMAT0022482	miR-5690	Medium																														0.326406	-0.389335
MIMAT0022485	miR-4666b	Medium																												-0.675522		0.53238
MIMAT0022486	miR-5693	Medium														-0.899735												-0.553194
MIMAT0022491	miR-5698	Medium												0.407717																		0.339846
MIMAT0022492	miR-5699-3p	Medium		0.483532																												0.333553
MIMAT0023712	miR-6087	Low												0.326093																		0.301632
MIMAT0024617	miR-6133	Low		-0.999941																					-0.897194
MIMAT0025460	miR-6502-5p	Low																	0.366372										0.412111
MIMAT0025462	miR-6503-5p	Low		0.392087															0.41906
MIMAT0025464	miR-6504-5p	Medium				-0.521149															-0.474239
MIMAT0025466	miR-6505-5p	Medium												0.724695															0.809837
MIMAT0025470	miR-6507-5p	Medium				0.323725									0.689381
MIMAT0025471	miR-6507-3p	Low								0.618053																							0.687842
MIMAT0025472	miR-6508-5p	Medium							-0.441072						0.352776
MIMAT0025475	miR-6509-3p	Low		-0.999963																												0.354866
MIMAT0025481	miR-6512-3p	Medium		0.985572																											-0.539732
MIMAT0025487	miR-6515-3p	Medium												-0.754738																		0.632393
MIMAT0025843	miR-6715b-3p	Medium		0.611946																												0.351524
MIMAT0025848	miR-6511b-3p	Low																					-0.312564									-0.48132
MIMAT0025849	miR-6718-5p	Medium												0.408635													0.476723
MIMAT0025851	miR-6720-3p	Low				-0.318301																										-0.559235
MIMAT0027353	miR-6726-5p	Low																		0.385704				-0.493414
MIMAT0027355	miR-6727-5p	Low		0.745337																								-0.556778
MIMAT0027357	miR-6728-5p	Low													0.379065												0.362709
MIMAT0027362	miR-6730-3p	Low						0.354224																								0.315307
MIMAT0027367	miR-6733-5p	Low	0.999881																									-0.497119
MIMAT0027370	miR-6734-3p	Medium				-0.349288																						-0.518045
MIMAT0027376	miR-6737-3p	Medium															-0.48437															0.377553
MIMAT0027380	miR-6739-3p	Low								-0.318675													-0.532112
MIMAT0027381	miR-6740-5p	Low													0.773475																				-0.999909
MIMAT0027382	miR-6740-3p	Medium																													-0.358561	0.456925
MIMAT0027384	miR-6741-3p	Medium															-0.815742															0.360072
MIMAT0027385	miR-6742-5p	Low																		-0.775533							-0.998755
MIMAT0027388	miR-6743-3p	Low	-0.367363																													0.425223
MIMAT0027390	miR-6744-3p	Low						0.309084					-0.382189
MIMAT0027391	miR-6745	Medium					0.62377														-0.872348
MIMAT0027398	miR-6749-5p	Low					0.83041				0.998343
MIMAT0027401	miR-6750-3p	Medium																										-0.521859							-0.461676
MIMAT0027402	miR-6751-5p	Medium		0.39312																												0.52083
MIMAT0027408	miR-6754-5p	Low															-0.584234		0.464804
MIMAT0027410	miR-6755-5p	Low												0.30345			-0.302227
MIMAT0027412	miR-6756-5p	Low				-0.975616																										0.87084
MIMAT0027415	miR-6757-3p	Low																-0.410813													-0.608391
MIMAT0027417	miR-6758-3p	Low																												0.397458		0.357382
MIMAT0027421	miR-6760-3p	Low																	0.312599									0.712556
MIMAT0027422	miR-6761-5p	Low															-0.404431															-0.361649
MIMAT0027439	miR-6769a-3p	Low									-0.444866			0.59042
MIMAT0027441	miR-6770-3p	Low	-0.717776																						0.481238
MIMAT0027442	miR-6771-5p	Medium				-0.666831																										0.658105
MIMAT0027453	miR-6776-3p	Low				-0.495205																										0.784361
MIMAT0027457	miR-6778-3p	Low																			-0.693462											0.685545
MIMAT0027459	miR-6779-3p	Low	0.999958													0.695708
MIMAT0027463	miR-6781-3p	Low	0.32588																									-0.302463
MIMAT0027465	miR-6782-3p	Low								-0.418146																						0.467933
MIMAT0027473	miR-6786-3p	Medium									-0.473883						-0.872456
MIMAT0027477	miR-6788-3p	Low												0.498173																		-0.394855
MIMAT0027479	miR-6789-3p	Low															-0.998183															0.646377
MIMAT0027481	miR-6790-3p	Low																	0.559445														-0.988514
MIMAT0027485	miR-6792-3p	Medium																										-0.979947				0.808618
MIMAT0027489	miR-6794-3p	Low				-0.823525							0.87985
MIMAT0027500	miR-6800-5p	Low																													-0.657306			-0.782509
MIMAT0027515	miR-6807-3p	Medium								-0.37019																		-0.756418
MIMAT0027519	miR-6809-3p	Medium													0.306702						0.34272
MIMAT0027523	miR-6811-3p	Medium																0.869665			-0.549782
MIMAT0027534	miR-6817-5p	Low	0.970309																													0.740923
MIMAT0027535	miR-6817-3p	Medium					-0.34115																											-0.414925
MIMAT0027540	miR-6820-5p	Low																-0.445324	0.31479
MIMAT0027543	miR-6821-3p	Low																								-0.680536						0.608502
MIMAT0027544	miR-6822-5p	Medium																														0.520245		-0.304408
MIMAT0027545	miR-6822-3p	Medium			0.972216																			-0.951968
MIMAT0027546	miR-6823-5p	Low				-0.379218																						-0.999901
MIMAT0027548	miR-6824-5p	Medium																	0.410075													0.439087
MIMAT0027549	miR-6824-3p	Medium																							0.305601							0.539827
MIMAT0027558	miR-6829-5p	Low																														0.753468		-0.999954
MIMAT0027561	miR-6830-3p	Low																								-0.869352								-0.369467
MIMAT0027562	miR-6831-5p	Medium																											0.999152			0.726507
MIMAT0027563	miR-6831-3p	Low											-0.999917														0.720579
MIMAT0027568	miR-6834-5p	Low																						-0.43374								0.356553
MIMAT0027575	miR-6836-3p	Low				-0.410416																										0.576779
MIMAT0027576	miR-6837-5p	Low																					-0.509804			0.315466
MIMAT0027580	miR-6839-5p	Low													0.440504																	0.326617
MIMAT0027581	miR-6839-3p	Medium																													-0.950273	0.858182
MIMAT0027583	miR-6840-3p	Low																										-0.997901					-0.70022
MIMAT0027586	miR-6842-5p	Low															-0.724003									0.605862
MIMAT0027587	miR-6842-3p	Medium														0.380434	-0.343519
MIMAT0027592	miR-6846-5p	Low																				-0.455132										0.68125
MIMAT0027596	miR-6848-5p	Medium																							0.745158		0.780582
MIMAT0027597	miR-6848-3p	Medium											-0.857298																			0.833042
MIMAT0027598	miR-6849-5p	Medium						0.928397																									-0.75879
MIMAT0027602	miR-6851-5p	Medium													0.665317																	0.41902
MIMAT0027603	miR-6851-3p	Low									-0.523672																	-0.313845
MIMAT0027608	miR-6854-5p	Medium		0.303268										0.389658
MIMAT0027613	miR-6856-3p	Low															0.948466															0.31137
MIMAT0027619	miR-6859-3p	Low								0.743115																				-0.997991
MIMAT0027630	miR-6865-5p	Low				-0.746236										0.999124
MIMAT0027634	miR-6867-5p	Low				-0.491386			-0.432139
MIMAT0027642	miR-6871-5p	Medium												0.957036													-0.363946
MIMAT0027645	miR-6872-3p	Low																	0.717021													0.946077
MIMAT0027665	miR-6882-3p	Low									-0.343198																					0.312285
MIMAT0027672	miR-6886-5p	Low						0.672273																								0.888673
MIMAT0027674	miR-6887-5p	Medium						0.524181			-0.607654
MIMAT0027689	miR-6894-3p	Low																						-0.456298								0.373826
MIMAT0028109	miR-7106-5p	Medium				-0.592792																												-0.601492
MIMAT0028110	miR-7106-3p	Low																	0.698219												-0.86911
MIMAT0028115	miR-7109-5p	Low																-0.53315		0.796429
MIMAT0028120	miR-7111-3p	Medium																	0.464669								0.418357
MIMAT0028122	miR-7112-3p	Medium													0.312579													-0.368071
MIMAT0028224	miR-7157-5p	Low					-0.417479																											-0.524987
MIMAT0028227	miR-7158-3p	Medium																						-0.984431						0.961898
MIMAT0030414	miR-4433b-3p	Low																	0.30649						0.364956
MIMAT0030418	miR-6516-3p	Medium		-0.363434																			-0.310053
MIMAT0030419	miR-7844-5p	Low																														0.580367	0.438596
MIMAT0030424	miR-7849-3p	Low					-0.446639																									0.801544
MIMAT0031176	miR-7973	Low				0.999225													0.689735
MIMAT0031177	miR-7974	Low	0.334264																													0.43386
MIMAT0000062	let-7a-5p	Very High															-0.339543
MIMAT0004481	let-7a-3p	Medium															-0.371195
MIMAT0000063	let-7b-5p	Very High															-0.358541
MIMAT0000065	let-7d-5p	High															-0.323402
MIMAT0000066	let-7e-5p	Very High																														-0.553134
MIMAT0000067	let-7f-5p	Very High																															-0.308637
MIMAT0004487	let-7f-2-3p	Medium															-0.345197
MIMAT0000069	miR-16-5p	Medium		0.314451
MIMAT0004489	miR-16-1-3p	Medium																															-0.347907
MIMAT0002891	miR-18a-3p	Medium																														0.515144
MIMAT0000074	miR-19b-3p	Medium																									0.364274
MIMAT0004500	miR-26b-3p	Medium															-0.395218
MIMAT0004504	miR-31-3p	Low		0.754341
MIMAT0000090	miR-32-5p	Medium															-0.32437
MIMAT0004505	miR-32-3p	Medium															-0.423095
MIMAT0004510	miR-96-3p	Medium																														0.480169
MIMAT0000096	miR-98-5p	Very High																														-0.450203
MIMAT0022842	miR-98-3p	Medium															-0.398355
MIMAT0004511	miR-99a-3p	Low																														-0.499132
MIMAT0004512	miR-100-3p	Medium																														-0.4229
MIMAT0004514	miR-29b-1-5p	Low																														0.489085
MIMAT0009196	miR-103a-2-5p	Low																						0.421672
MIMAT0000102	miR-105-5p	Medium												0.679608
MIMAT0000103	miR-106a-5p	High																									0.301364
MIMAT0000104	miR-107	High																-0.310988
MIMAT0000226	miR-196a-5p	Medium																															0.316529
MIMAT0000242	miR-129-5p	Medium															-0.37183
MIMAT0004548	miR-129-1-3p	Medium															-0.374632
MIMAT0000262	miR-187-3p	Medium																														0.300485
MIMAT0000264	miR-203a-3p	High																														-0.458578
MIMAT0000268	miR-211-5p	Medium																						-0.374419
MIMAT0022695	miR-212-5p	Medium																						0.331856
MIMAT0022844	miR-216a-3p	Medium																						0.33997
MIMAT0004587	miR-23b-5p	Medium		0.430661
MIMAT0026477	miR-128-1-5p	Low																														0.345027
MIMAT0026478	miR-133a-5p	Low																														-0.310051
MIMAT0004595	miR-135a-3p	Medium																														-0.515351
MIMAT0004605	miR-129-2-3p	Medium															-0.406647
MIMAT0026481	miR-134-3p	Low												0.580265
MIMAT0004607	miR-138-1-3p	Low																						-0.364742
MIMAT0004608	miR-146a-3p	High												0.499406
MIMAT0000450	miR-149-5p	Very High																					-0.319397
MIMAT0004609	miR-149-3p	Medium															-0.993029
MIMAT0004611	miR-185-3p	Medium																														0.432468
MIMAT0000456	miR-186-5p	Medium															-0.367915
MIMAT0004612	miR-186-3p	Low															-0.358569
MIMAT0004613	miR-188-3p	Medium																														-0.382179
MIMAT0000458	miR-190a-5p	Medium																							-0.519577
MIMAT0026482	miR-190a-3p	Medium									-0.387101
MIMAT0000459	miR-193a-3p	Medium												0.353133
MIMAT0000462	miR-206	High																														-0.478124
MIMAT0000510	miR-320a	Medium				-0.301084
MIMAT0031095	miR-128-2-5p	Low																															-0.524694
MIMAT0000681	miR-29c-3p	Medium																														0.310415
MIMAT0000686	miR-34c-5p	Medium													0.339503
MIMAT0004677	miR-34c-3p	Medium																																0.313323
MIMAT0000691	miR-130b-3p	Medium													0.396293
MIMAT0004682	miR-361-3p	Medium																						0.304225
MIMAT0003385	miR-363-5p	Medium																															-0.364757
MIMAT0000710	miR-365a-3p	Very High																						0.322425
MIMAT0022833	miR-365b-5p	Low	0.344795
MIMAT0022834	miR-365b-3p	Medium																						0.322539
MIMAT0000714	miR-302b-5p	Medium																														0.347812
MIMAT0022861	miR-376c-5p	Medium												0.828996
MIMAT0026484	miR-372-5p	Medium																														0.638753
MIMAT0000725	miR-373-5p	Medium																														0.734981
MIMAT0004688	miR-374a-3p	Low																														0.418326
MIMAT0000728	miR-375	Medium																														-0.427175
MIMAT0003386	miR-376a-5p	Low														0.324597
MIMAT0000729	miR-376a-3p	High												0.558217
MIMAT0000730	miR-377-3p	Medium												0.509276
MIMAT0004690	miR-379-3p	Medium												0.600228
MIMAT0000735	miR-380-3p	Medium												0.780048
MIMAT0000738	miR-383-5p	High																														-0.427796
MIMAT0004692	miR-340-5p	Medium												0.311991
MIMAT0026486	miR-328-5p	Medium																						-0.394568
MIMAT0004695	miR-337-5p	Medium												0.912136
MIMAT0004696	miR-323a-5p	Medium				-0.370527
MIMAT0000755	miR-323a-3p	Medium												0.541142
MIMAT0000756	miR-326	Medium												0.590148
MIMAT0004702	miR-339-3p	Medium															-0.304517
MIMAT0000765	miR-335-5p	Medium																														-0.362837
MIMAT0004703	miR-335-3p	Medium													0.303755
MIMAT0000772	miR-345-5p	Medium																																-0.307588
MIMAT0004751	miR-18b-3p	Low																															-0.367162
MIMAT0026558	miR-410-5p	Low														0.410686
MIMAT0022923	miR-376b-5p	Medium												0.829818
MIMAT0002172	miR-376b-3p	High												0.693011
MIMAT0002810	miR-202-5p	Low		-0.449777
MIMAT0022924	miR-495-5p	Medium												0.672332
MIMAT0002818	miR-496	Medium												0.505054
MIMAT0002819	miR-193b-3p	Medium																														0.464013
MIMAT0004768	miR-497-3p	Medium																					-0.401552
MIMAT0002828	miR-519e-5p	Medium																														0.348301
MIMAT0026609	miR-520f-5p	Low																			0.818318
MIMAT0002850	miR-524-3p	Medium																														0.331354
MIMAT0002852	miR-517a-3p	Medium																														0.556241
MIMAT0002857	miR-517b-3p	Medium																														0.556235
MIMAT0005450	miR-518e-5p	Low																															-0.837318
MIMAT0004772	miR-499a-3p	Low									-0.305025
MIMAT0004773	miR-500a-5p	Low																														-0.314879
MIMAT0031074	miR-450a-2-3p	Low																								-0.383135
MIMAT0022925	miR-503-3p	Medium																														-0.319088
MIMAT0002875	miR-504-5p	Medium															-0.403852
MIMAT0002876	miR-505-3p	Low															-0.393083
MIMAT0004778	miR-508-5p	Medium																						-0.536515
MIMAT0002880	miR-508-3p	Medium																						-0.548775
MIMAT0002881	miR-509-3p	Medium																						-0.557606
MIMAT0026613	miR-510-3p	Medium																						-0.464575
MIMAT0002883	miR-514a-3p	Medium																						-0.524657
MIMAT0004780	miR-532-3p	Medium																														-0.319638
MIMAT0004785	miR-545-5p	Medium									-0.32563
MIMAT0003165	miR-545-3p	Medium													0.358005
MIMAT0026614	miR-487b-5p	Low																										-0.324661
MIMAT0003214	miR-551a	Medium																														-0.341011
MIMAT0004792	miR-92b-5p	Medium												0.498941
MIMAT0003219	miR-555	Medium																							0.8871
MIMAT0003220	miR-556-5p	Medium																								-0.306805
MIMAT0022706	miR-561-5p	Medium																						-0.306481
MIMAT0003228	miR-564	Low																	-0.786023
MIMAT0004795	miR-574-5p	Medium																									-0.908698
MIMAT0003246	miR-581	Medium																															-0.32302
MIMAT0003250	miR-585-3p	Medium																														-0.330991
MIMAT0003252	miR-586	Medium																	0.953682
MIMAT0003255	miR-588	Medium			-0.978331
MIMAT0004799	miR-589-5p	Medium															-0.332465
MIMAT0004800	miR-550a-5p	Low		0.491476
MIMAT0003265	miR-597-5p	Medium																														0.496111
MIMAT0004803	miR-548a-5p	Medium																											-0.666108
MIMAT0003270	miR-602	Medium		-0.998403
MIMAT0003274	miR-606	Medium																															-0.982132
MIMAT0003277	miR-609	Medium																														0.546704
MIMAT0003279	miR-611	Medium											-0.556065
MIMAT0003283	miR-615-3p	Medium																															0.347354
MIMAT0003290	miR-621	Medium																0.647674
MIMAT0003294	miR-625-5p	Medium																														0.506005
MIMAT0003296	miR-627-5p	Medium																														0.365354
MIMAT0003297	miR-628-3p	Medium																														0.313451
MIMAT0004811	miR-33b-3p	Low																														0.420559
MIMAT0003302	miR-632	Medium															-0.432466
MIMAT0003306	miR-636	Medium																																	-0.373526
MIMAT0003307	miR-637	Medium											0.999893
MIMAT0003317	miR-647	Medium																	0.52766
MIMAT0026624	miR-651-3p	Low					0.989925
MIMAT0026625	miR-653-3p	Medium																											-0.44595
MIMAT0026626	miR-655-5p	Low																														0.302361
MIMAT0003332	miR-656-3p	Medium												0.682243
MIMAT0003335	miR-657	Medium																	0.416449
MIMAT0003336	miR-658	Medium																															-0.344791
MIMAT0003338	miR-660-5p	Medium																														-0.357152
MIMAT0005791	miR-1264	Medium					-0.998416
MIMAT0026636	miR-668-5p	Low																															-0.998879
MIMAT0020925	miR-550a-3-5p	Medium		0.451436
MIMAT0005458	miR-1224-5p	Medium																									-0.423977
MIMAT0005796	miR-1271-5p	Medium															-0.409364
MIMAT0005797	miR-1301-3p	Medium																														-0.428194
MIMAT0003884	miR-454-5p	Low																														-0.388797
MIMAT0003885	miR-454-3p	Medium																														-0.348641
MIMAT0005798	miR-1185-5p	Medium												0.831121
MIMAT0022838	miR-1185-1-3p	Medium												0.918371
MIMAT0010357	miR-670-5p	Medium																												-0.657758
MIMAT0005800	miR-1298-5p	Medium																															0.583153
MIMAT0026641	miR-1298-3p	Low																						0.463147
MIMAT0003948	miR-770-5p	Medium						0.382316
MIMAT0026717	miR-891a-3p	Low																														0.923882
MIMAT0026718	miR-874-5p	Low																																-0.326999
MIMAT0004916	miR-888-5p	Medium					-0.460905
MIMAT0004918	miR-892b	Medium																							0.373252
MIMAT0004919	miR-541-5p	Medium	0.967825
MIMAT0004948	miR-885-3p	Medium																								-0.605184
MIMAT0004957	miR-760	Very High																														-0.310456
MIMAT0004958	miR-301b-3p	Medium																														-0.399225
MIMAT0026721	miR-216b-3p	Medium																		0.770504
MIMAT0004975	miR-509-3-5p	Medium																						-0.555186
MIMAT0004980	miR-937-3p	Medium																						0.325686
MIMAT0004986	miR-943	Medium																	0.310471
MIMAT0005823	miR-1178-3p	Medium																	0.546634
MIMAT0005826	miR-1181	Medium																														0.361398
MIMAT0005827	miR-1182	Medium																													0.944348
MIMAT0005576	miR-1226-5p	Medium																			0.397477
MIMAT0005582	miR-1228-5p	Low												0.529997
MIMAT0005583	miR-1228-3p	Medium												0.516591
MIMAT0005584	miR-1229-3p	Medium												0.346565
MIMAT0005586	miR-1231	Medium																			-0.803331
MIMAT0005593	miR-1238-3p	Medium																						-0.478266
MIMAT0005874	miR-548e-3p	Medium															-0.334851
MIMAT0026738	miR-1287-3p	Low				-0.399815
MIMAT0005879	miR-1289	Medium																																-0.836136
MIMAT0005880	miR-1290	Medium					0.815629
MIMAT0005884	miR-1294	Medium																									0.377604
MIMAT0005885	miR-1295a	Medium																														-0.343026
MIMAT0005892	miR-1304-5p	High																															-0.315061
MIMAT0005900	miR-1248	Medium																														0.312549
MIMAT0005902	miR-1250-5p	Medium																										-0.325294
MIMAT0005906	miR-1255a	Medium																							0.558697
MIMAT0005908	miR-1257	Medium																														0.339347
MIMAT0005909	miR-1258	Medium																														0.334282
MIMAT0005911	miR-1260a	Medium																																-0.328768
MIMAT0005923	miR-1269a	Medium												0.499222
MIMAT0005929	miR-1275	Medium																														0.33184
MIMAT0005933	miR-1277-3p	Medium																															-0.30607
MIMAT0005941	miR-1284	Medium		0.502054
MIMAT0026743	miR-1288-5p	Low																						0.513416
MIMAT0022726	miR-1306-5p	Medium															-0.49251
MIMAT0006764	miR-320d	Medium												0.470642
MIMAT0007881	miR-1908-5p	Medium															0.906806
MIMAT0026916	miR-1908-3p	Low				-0.359496
MIMAT0026917	miR-1910-3p	Medium																						-0.458599
MIMAT0007887	miR-1912	Medium		-0.888073
MIMAT0007888	miR-1913	Medium																										-0.42927
MIMAT0007889	miR-1914-5p	Medium																								0.440967
MIMAT0007891	miR-1915-5p	Low		0.62261
MIMAT0007892	miR-1915-3p	Medium																-0.303929
MIMAT0011156	miR-2114-5p	Medium			-0.516962
MIMAT0011158	miR-2115-5p	Low																										-0.305506
MIMAT0011777	miR-2277-3p	Medium												0.343929
MIMAT0011778	miR-2278	Medium																														0.336339
MIMAT0013515	miR-2681-5p	Medium																															-0.634932
MIMAT0013516	miR-2681-3p	Medium																														0.562986
MIMAT0012735	miR-718	Low				-0.793317
MIMAT0014977	miR-3115	Low																										-0.476545
MIMAT0019197	miR-3117-5p	Low																	0.6408
MIMAT0014979	miR-3117-3p	Low		0.515
MIMAT0019198	miR-3120-5p	Medium																														0.784562
MIMAT0019199	miR-3121-5p	Medium																				-0.500952
MIMAT0014984	miR-3122	Medium						-0.954746
MIMAT0014989	miR-3126-5p	Medium									-0.776037
MIMAT0015377	miR-3126-3p	High																															-0.348661
MIMAT0014990	miR-3127-5p	Medium															-0.411668
MIMAT0019201	miR-3127-3p	Medium															-0.597311
MIMAT0014991	miR-3128	Low																														0.312168
MIMAT0014995	miR-3130-5p	Low																														0.445968
MIMAT0014996	miR-3131	Medium																								-0.354817
MIMAT0015001	miR-3135a	Medium														-0.584407
MIMAT0015002	miR-466	Low																																-0.419143
MIMAT0015003	miR-3136-5p	Low																	0.43712
MIMAT0019203	miR-3136-3p	Low																														0.539386
MIMAT0015004	miR-544b	Low																																	0.774579
MIMAT0019204	miR-3140-5p	Low																-0.498988
MIMAT0015011	miR-3142	Medium																		0.820329
MIMAT0015014	miR-3144-5p	Low						0.8457
MIMAT0015019	miR-3147	Medium																									0.963347
MIMAT0015022	miR-3149	Medium															-0.741068
MIMAT0015023	miR-3150a-3p	Medium																-0.367753
MIMAT0019207	miR-3152-5p	Medium																									-0.377611
MIMAT0015028	miR-3154	Medium																														-0.401718
MIMAT0015029	miR-3155a	Low																															-0.321702
MIMAT0019209	miR-3156-3p	Medium																					-0.921764
MIMAT0015034	miR-3160-3p	Low					-0.300347
MIMAT0015038	miR-3164	Medium																					0.952218
MIMAT0015043	miR-3168	Medium																											-0.406169
MIMAT0015044	miR-3169	Medium																														-0.583465
MIMAT0015056	miR-3179	Medium																		-0.740481
MIMAT0015060	miR-548w	Medium																															-0.811632
MIMAT0015061	miR-3181	Low																									0.714843
MIMAT0015066	miR-3065-5p	Medium																														-0.407238
MIMAT0019217	miR-3189-5p	Low																		0.389099
MIMAT0022732	miR-3191-5p	Medium																														0.356524
MIMAT0015076	miR-3192-5p	Medium																					-0.440281
MIMAT0027027	miR-3192-3p	Low																													0.639552
MIMAT0019218	miR-3194-3p	Medium																	0.30465
MIMAT0015079	miR-3195	Low																									-0.976696
MIMAT0015080	miR-3196	Low								-0.347714
MIMAT0015088	miR-514b-3p	Low																						-0.342604
MIMAT0016866	miR-4315	Low																	0.9621
MIMAT0017950	miR-2355-3p	Low												0.374816
MIMAT0016916	miR-4286	Low												0.943577
MIMAT0016925	miR-500b-5p	Low																														-0.315281
MIMAT0017981	miR-3605-5p	Medium												0.485498
MIMAT0022965	miR-3606-3p	Medium																														-0.968731
MIMAT0017984	miR-3607-5p	Low																														0.447313
MIMAT0017985	miR-3607-3p	Medium																														0.628997
MIMAT0017990	miR-3613-5p	Medium																							-0.362377
MIMAT0017994	miR-3615	Low				-0.304138
MIMAT0017997	miR-3617-5p	Low																								-0.694942
MIMAT0019219	miR-3619-3p	Low																						0.404262
MIMAT0018071	miR-3651	Medium																														0.395854
MIMAT0018072	miR-3652	Medium																															-0.327979
MIMAT0018075	miR-3655	Low																														0.322656
MIMAT0018080	miR-3659	Low																								0.931125
MIMAT0018085	miR-3663-3p	Low																	0.34294
MIMAT0018099	miR-3675-3p	Medium																														0.50432
MIMAT0018102	miR-3678-5p	Low									-0.310174
MIMAT0018106	miR-3680-5p	Low	0.419237
MIMAT0018107	miR-3680-3p	Medium									-0.329072
MIMAT0018108	miR-3681-5p	Medium																										-0.419208
MIMAT0019223	miR-3688-5p	Medium																	0.898978
MIMAT0018119	miR-3690	Medium												0.30387
MIMAT0018120	miR-3691-5p	Medium		0.440959
MIMAT0018178	miR-3180	Low																			0.997567
MIMAT0018179	miR-3907	Medium																		0.407496
MIMAT0018185	miR-3911	Medium																										-0.528727
MIMAT0027036	miR-3912-5p	Medium															-0.773692
MIMAT0018191	miR-3917	Low																															-0.326178
MIMAT0018193	miR-3919	Low															-0.963849
MIMAT0018196	miR-3921	Medium																										-0.317462
MIMAT0019227	miR-3922-5p	Low																															-0.441779
MIMAT0019228	miR-3925-3p	Medium														0.484331
MIMAT0018202	miR-3927-3p	Medium																										-0.401132
MIMAT0018204	miR-676-3p	High																														-0.41187
MIMAT0027037	miR-3928-5p	Low																																-0.363283
MIMAT0018206	miR-3929	Low																	0.724378
MIMAT0018349	miR-3934-5p	Low		0.482337
MIMAT0018354	miR-548y	Medium																						-0.342501
MIMAT0019229	miR-3940-5p	Low																														0.392351
MIMAT0018359	miR-3943	Low																												-0.482779
MIMAT0018932	miR-378f	Low																														0.360421
MIMAT0018935	miR-4422	Low				-0.598733
MIMAT0018937	miR-378g	Medium																														0.498125
MIMAT0018940	miR-4425	Low																														0.527765
MIMAT0018941	miR-4426	Medium																																-0.593274
MIMAT0018943	miR-4428	Medium														-0.99736
MIMAT0018946	miR-548ad-3p	Medium																														0.74158
MIMAT0018947	miR-4431	Low														0.561807
MIMAT0020956	miR-4433a-5p	Low																						-0.926882
MIMAT0018950	miR-4434	Medium																														0.370398
MIMAT0018952	miR-4436a	Medium														-0.998874
MIMAT0018953	miR-4437	Low											-0.556934
MIMAT0018962	miR-4444	Low																														0.30194
MIMAT0018964	miR-4445-3p	Low																														0.55517
MIMAT0018979	miR-4457	Medium																																-0.999841
MIMAT0018988	miR-4464	Medium															-0.604079
MIMAT0018989	miR-548ai	Medium																														0.394877
MIMAT0018993	miR-4466	Low																														0.423558
MIMAT0018994	miR-4467	Low																														0.838544
MIMAT0018997	miR-4470	Low			0.8676
MIMAT0018998	miR-4471	Low																			0.785648
MIMAT0019001	miR-4474-3p	Low																														0.441869
MIMAT0019005	miR-4477b	Medium																															0.567922
MIMAT0019009	miR-3689e	Low																		0.603223
MIMAT0019011	miR-4479	Low			0.889507
MIMAT0019013	miR-548ak	Medium																														0.97783
MIMAT0019016	miR-4482-5p	Low																			-0.310287
MIMAT0020958	miR-4482-3p	Medium																														0.583237
MIMAT0019018	miR-4484	Medium																														0.405018
MIMAT0019025	miR-4490	Medium																			0.619935
MIMAT0019027	miR-4492	Medium													0.446994
MIMAT0019028	miR-4493	Low																														0.894411
MIMAT0019029	miR-4494	Medium								-0.549366
MIMAT0019030	miR-4495	Medium																																-0.398296
MIMAT0019031	miR-4496	Medium																		0.335381
MIMAT0019037	miR-4501	Medium				-0.310403
MIMAT0019041	miR-4505	Medium															-0.393993
MIMAT0019044	miR-4507	Medium					-0.42002
MIMAT0019048	miR-4511	Low			0.897939
MIMAT0019052	miR-4515	Low																						-0.439872
MIMAT0019056	miR-4519	Low									-0.560962
MIMAT0019066	miR-4527	Low																				-0.999104
MIMAT0019068	miR-4529-3p	Medium			0.755517
MIMAT0019071	miR-4532	Medium																														0.332948
MIMAT0020959	miR-4536-3p	Medium												-0.318924
MIMAT0019079	miR-548an	Low																															-0.999673
MIMAT0022977	miR-4632-5p	Medium																																-0.628905
MIMAT0019693	miR-4636	Low																														-0.378542
MIMAT0019695	miR-4638-5p	Medium																														0.397015
MIMAT0019702	miR-4642	Medium																									0.968226
MIMAT0019703	miR-4643	Low																														0.507472
MIMAT0019704	miR-4644	Low																															-0.969127
MIMAT0019711	miR-4649-5p	Medium																											-0.784083
MIMAT0019721	miR-4655-5p	Low							-1
MIMAT0019722	miR-4655-3p	Low													0.877437
MIMAT0019726	miR-4659a-5p	Medium																														0.450292
MIMAT0019729	miR-4661-5p	Low																														0.600373
MIMAT0019734	miR-4659b-3p	Low																0.848845
MIMAT0019735	miR-4663	Medium																														0.998536
MIMAT0019736	miR-4662b	Medium																	0.959765
MIMAT0019744	miR-4667-3p	Medium																														0.482786
MIMAT0019748	miR-219b-3p	Medium																															-0.328065
MIMAT0019753	miR-4671-3p	Low													-0.804481
MIMAT0019759	miR-4676-3p	Low									-0.394045
MIMAT0019762	miR-4678	Medium																														0.502177
MIMAT0019765	miR-4680-3p	Medium																														0.516684
MIMAT0019767	miR-4682	Low		-0.999659
MIMAT0019770	miR-4684-3p	Low					-0.389283
MIMAT0019772	miR-4685-3p	Medium									-0.319177
MIMAT0027038	miR-1343-5p	Medium																		0.965911
MIMAT0019778	miR-4689	Low																														0.527873
MIMAT0019785	miR-4693-3p	Medium																										0.984708
MIMAT0019788	miR-4695-5p	Medium																									0.997078
MIMAT0019792	miR-4697-3p	Low				-0.427064
MIMAT0019794	miR-4699-5p	Medium														-0.70075
MIMAT0019796	miR-4700-5p	Low																														0.373271
MIMAT0019801	miR-4703-5p	Medium																																-0.903788
MIMAT0019803	miR-4704-5p	Low				-0.790762
MIMAT0019805	miR-4705	Low							-0.812155
MIMAT0019811	miR-4709-5p	Medium	0.757425
MIMAT0019812	miR-4709-3p	Low																						0.449492
MIMAT0019815	miR-4710	Low														-0.436398
MIMAT0019817	miR-4711-3p	Medium																														0.999997
MIMAT0019820	miR-4713-5p	Low																														0.332313
MIMAT0019823	miR-4714-3p	Medium		0.726047
MIMAT0019826	miR-4716-5p	Medium																				0.309046
MIMAT0022741	miR-3529-3p	Medium													0.98954
MIMAT0019833	miR-4720-5p	Low																0.590928
MIMAT0019836	miR-4722-5p	Medium																														0.672933
MIMAT0019842	miR-4724-3p	Low					-0.344416
MIMAT0019852	miR-4730	Low																-0.450761
MIMAT0019857	miR-4733-5p	Low																														0.350617
MIMAT0019858	miR-4733-3p	Medium		0.628479
MIMAT0019859	miR-4734	Low																														0.428999
MIMAT0019860	miR-4735-5p	Low																															-0.338867
MIMAT0019861	miR-4735-3p	Low																														0.799658
MIMAT0019862	miR-4736	Medium																														0.334663
MIMAT0019864	miR-3064-5p	Medium																																	-0.412475
MIMAT0019865	miR-3064-3p	Low															-0.404814
MIMAT0019869	miR-4740-5p	Medium																	0.317728
MIMAT0019877	miR-3591-3p	Low																	0.963757
MIMAT0019891	miR-4753-3p	Medium																														0.439858
MIMAT0019894	miR-4754	Low																														0.368149
MIMAT0019896	miR-4755-3p	Low																															-0.343079
MIMAT0019897	miR-499b-5p	Medium						0.649392
MIMAT0019899	miR-4756-5p	Medium						-0.999091
MIMAT0019903	miR-4758-5p	Low																										-0.354952
MIMAT0019905	miR-4759	Low																																	0.621819
MIMAT0019906	miR-4760-5p	Medium			0.958947
MIMAT0019909	miR-4761-3p	Low																		0.997242
MIMAT0019914	miR-4764-5p	Low																														0.659741
MIMAT0019915	miR-4764-3p	Medium																																0.964253
MIMAT0019918	miR-4766-3p	Medium		0.656879
MIMAT0019919	miR-4767	Low									-0.935081
MIMAT0019923	miR-4769-3p	Low																												-0.787165
MIMAT0019928	miR-4773	Medium																														0.813529
MIMAT0019933	miR-4776-3p	Low											-0.307168
MIMAT0019937	miR-4778-3p	Medium					-0.452047
MIMAT0019944	miR-4782-5p	Medium																								-0.453266
MIMAT0019945	miR-4782-3p	Low				-0.905495
MIMAT0019947	miR-4783-3p	Medium						0.999473
MIMAT0019948	miR-4784	Low																															-0.360652
MIMAT0019950	miR-1245b-5p	Medium																														0.417432
MIMAT0019955	miR-4786-3p	Medium																						-0.543184
MIMAT0019961	miR-4790-5p	Low																								-0.57788
MIMAT0019965	miR-4793-5p	Medium				-0.688361
MIMAT0019966	miR-4793-3p	Medium	0.89822
MIMAT0019974	miR-4798-5p	Low																														0.516969
MIMAT0019975	miR-4798-3p	Low																															-0.544923
MIMAT0019977	miR-4799-3p	Low													-1
MIMAT0019979	miR-4800-3p	Low																														0.497979
MIMAT0019981	miR-4802-5p	Low																														0.404569
MIMAT0021017	miR-4999-5p	Medium															-0.332694
MIMAT0021018	miR-4999-3p	Low																														0.386411
MIMAT0021021	miR-5001-5p	Medium															-0.321213
MIMAT0021022	miR-5001-3p	Medium																														0.39307
MIMAT0021024	miR-5002-3p	Medium													0.549442
MIMAT0021025	miR-5003-5p	Medium																															-0.390747
MIMAT0021030	miR-548ao-3p	Low						0.386896
MIMAT0021033	miR-5006-5p	Medium																							0.387615
MIMAT0021035	miR-5007-5p	Low																														0.471958
MIMAT0021042	miR-5009-3p	Low																			-0.976261
MIMAT0021043	miR-5010-5p	Low									-0.407351
MIMAT0021079	miR-5087	Low																														0.54919
MIMAT0027041	miR-5088-3p	Medium																																-0.658346
MIMAT0021081	miR-5089-5p	Low																														0.470633
MIMAT0021084	miR-5092	Medium							-0.654043
MIMAT0021117	miR-5187-5p	Low															-0.348035
MIMAT0021119	miR-5188	Low																											0.99722
MIMAT0021120	miR-5189-5p	Medium											-0.802195
MIMAT0021121	miR-5190	Medium																												0.907581
MIMAT0021125	miR-5194	Low											0.616518
MIMAT0021129	miR-5196-3p	Low																														0.609354
MIMAT0022266	miR-548ar-3p	Medium																														0.564369
MIMAT0022270	miR-5579-3p	Low																					-0.411598
MIMAT0022271	miR-664b-5p	Low																														0.326008
MIMAT0022272	miR-664b-3p	Medium															-0.501687
MIMAT0022274	miR-5580-3p	Medium																										-0.417518
MIMAT0022277	miR-548at-5p	Medium																														0.319707
MIMAT0022295	miR-5588-5p	Low																								-0.550675
MIMAT0022296	miR-5588-3p	Medium																						-0.331183
MIMAT0022298	miR-5589-3p	Medium																								-0.823161
MIMAT0022468	miR-5680	Medium																															0.312293
MIMAT0022472	miR-5683	Low					0.422688
MIMAT0022476	miR-5692c	Medium																									0.973267
MIMAT0022480	miR-5681b	Medium																																	-0.943334
MIMAT0022481	miR-5689	Low					-0.563082
MIMAT0022487	miR-5694	Low																																-0.572076
MIMAT0022489	miR-5696	Medium															-0.502794
MIMAT0022490	miR-5697	Medium																	0.336487
MIMAT0022495	miR-5702	Medium																															-0.560123
MIMAT0022500	miR-5706	Low																														0.50606
MIMAT0022502	miR-5708	Low																														0.405793
MIMAT0031119	miR-1199-5p	Low																													0.99851
MIMAT0024598	miR-6125	Low																					-0.391909
MIMAT0024618	miR-6134	Low																														0.977725
MIMAT0025451	miR-6499-3p	Low																									0.979605
MIMAT0025456	miR-548az-5p	Medium																										-0.400768
MIMAT0025459	miR-6501-3p	Medium																														0.38874
MIMAT0025461	miR-6502-3p	Medium																		-0.671247
MIMAT0025463	miR-6503-3p	Low																	0.431428
MIMAT0025467	miR-6505-3p	Low																													-0.532123
MIMAT0025468	miR-6506-5p	Low																							0.467384
MIMAT0025473	miR-6508-3p	Low												-0.646116
MIMAT0025476	miR-6510-5p	Low											-0.424281
MIMAT0025477	miR-6510-3p	Low																														-0.478485
MIMAT0025482	miR-6513-5p	Low																										-0.467039
MIMAT0025483	miR-6513-3p	Medium																						-0.455792
MIMAT0025485	miR-6514-3p	Medium																															-0.309472
MIMAT0025845	miR-6716-3p	Low																														-0.383953
MIMAT0027345	miR-6720-5p	Medium							-0.659301
MIMAT0025857	miR-892c-5p	Medium																								0.99985
MIMAT0025858	miR-892c-3p	Medium																												-0.347328
MIMAT0027360	miR-6729-3p	Low												0.931675
MIMAT0027361	miR-6730-5p	Low				-0.460041
MIMAT0027369	miR-6734-5p	Medium																											-0.35634
MIMAT0027372	miR-6735-3p	Low																														0.530228
MIMAT0027375	miR-6737-5p	Low																														0.307846
MIMAT0027379	miR-6739-5p	Low																	0.889586
MIMAT0027387	miR-6743-5p	Low																	0.999845
MIMAT0027389	miR-6744-5p	Low						0.315879
MIMAT0027392	miR-6746-5p	Low																													-0.881384
MIMAT0027395	miR-6747-3p	Low		0.375425
MIMAT0027403	miR-6751-3p	Medium												0.97407
MIMAT0027406	miR-6753-5p	Medium																								-0.974957
MIMAT0027407	miR-6753-3p	Low																														0.633198
MIMAT0027411	miR-6755-3p	Medium																									-0.817228
MIMAT0027416	miR-6758-5p	Medium		0.859993
MIMAT0027418	miR-6759-5p	Low																									0.668529
MIMAT0027426	miR-6763-5p	Low																								-0.362218
MIMAT0027427	miR-6763-3p	Low																															0.999288
MIMAT0027428	miR-6764-5p	Medium	0.478539
MIMAT0027429	miR-6764-3p	Medium													0.478621
MIMAT0027431	miR-6765-3p	Low																															0.825741
MIMAT0027432	miR-6766-5p	Medium																							0.991172
MIMAT0027434	miR-6767-5p	Low															-0.610822
MIMAT0027435	miR-6767-3p	Low				-0.854419
MIMAT0027436	miR-6768-5p	Medium																			0.927016
MIMAT0027437	miR-6768-3p	Low																														0.894527
MIMAT0027446	miR-6773-5p	Low																										-0.665327
MIMAT0027452	miR-6776-5p	Low							-0.473216
MIMAT0027455	miR-6777-3p	Low				-0.407459
MIMAT0027460	miR-6780a-5p	Medium											-0.524057
MIMAT0027462	miR-6781-5p	Low																															0.972038
MIMAT0027464	miR-6782-5p	Medium																	0.53024
MIMAT0027466	miR-6783-5p	Low		0.724864
MIMAT0027467	miR-6783-3p	Low																										-0.387576
MIMAT0027469	miR-6784-3p	Low				-0.323166
MIMAT0027470	miR-6785-5p	Medium																		-0.357689
MIMAT0027471	miR-6785-3p	Low																	0.343149
MIMAT0027472	miR-6786-5p	Medium																							0.701354
MIMAT0027474	miR-6787-5p	Medium															-0.998345
MIMAT0027486	miR-6793-5p	Low																														0.322591
MIMAT0027487	miR-6793-3p	Low																			-0.428243
MIMAT0027488	miR-6794-5p	Low																																	-0.614503
MIMAT0027491	miR-6795-3p	Low																															0.425218
MIMAT0027492	miR-6796-5p	Low															-0.999944
MIMAT0027494	miR-6797-5p	Low																						-0.966878
MIMAT0027495	miR-6797-3p	Low																															0.337405
MIMAT0027497	miR-6798-3p	Low																					-0.375632
MIMAT0027502	miR-6801-5p	Low																														0.434015
MIMAT0027503	miR-6801-3p	Low																							0.317597
MIMAT0027505	miR-6802-3p	Low												0.369371
MIMAT0027509	miR-6804-3p	Low																											0.722454
MIMAT0027511	miR-6805-3p	Low																														0.666778
MIMAT0027514	miR-6807-5p	Medium																											0.493729
MIMAT0027517	miR-6808-3p	Medium		-0.359795
MIMAT0027520	miR-6810-5p	Medium																	0.550954
MIMAT0027522	miR-6811-5p	Low																									-0.510205
MIMAT0027524	miR-6812-5p	Low																																-0.535005
MIMAT0027526	miR-6813-5p	Medium											-0.311426
MIMAT0027529	miR-6814-3p	Low				-0.327709
MIMAT0027530	miR-6815-5p	Medium																									0.317945
MIMAT0027531	miR-6815-3p	Medium																										-0.314223
MIMAT0027533	miR-6816-3p	Low				-0.334836
MIMAT0027536	miR-6818-5p	Low																														0.303238
MIMAT0027537	miR-6818-3p	Medium		0.378918
MIMAT0027541	miR-6820-3p	Low															-0.45291
MIMAT0027542	miR-6821-5p	Low									-0.363651
MIMAT0027550	miR-6825-5p	Medium									-0.627164
MIMAT0027551	miR-6825-3p	Low																														0.621817
MIMAT0027552	miR-6826-5p	Low											0.550928
MIMAT0027559	miR-6829-3p	Low											0.723211
MIMAT0027569	miR-6834-3p	Low								-0.580824
MIMAT0027572	miR-6780b-5p	Low																														0.487601
MIMAT0027582	miR-6840-5p	Low																	0.63256
MIMAT0027584	miR-6841-5p	Low																									-0.355783
MIMAT0027589	miR-6844	Medium																										-0.323444
MIMAT0027601	miR-6850-3p	Low																														0.855576
MIMAT0027604	miR-6852-5p	Low															-0.520418
MIMAT0027605	miR-6852-3p	Low																0.986598
MIMAT0027609	miR-6854-3p	Low								-0.516297
MIMAT0027611	miR-6855-3p	Low								-0.452697
MIMAT0027614	miR-6857-5p	Medium											0.98059
MIMAT0027616	miR-6858-5p	Low															-0.608432
MIMAT0027624	miR-6861-3p	Low														-0.997483
MIMAT0027627	miR-6863	Low																				0.676038
MIMAT0027628	miR-6864-5p	Low																	0.616399
MIMAT0027636	miR-6868-5p	Low									0.880823
MIMAT0027637	miR-6868-3p	Medium																														-0.311479
MIMAT0027638	miR-6869-5p	Low																														0.495422
MIMAT0027641	miR-6870-3p	Low																												0.353098
MIMAT0027643	miR-6871-3p	Low											0.469038
MIMAT0027648	miR-6874-5p	Low								-0.432484
MIMAT0027652	miR-6876-5p	Low																		0.778699
MIMAT0027655	miR-6877-3p	Low																	0.693888
MIMAT0027657	miR-6878-3p	Low																															-0.852152
MIMAT0027660	miR-6880-5p	Low																															0.909442
MIMAT0027662	miR-6881-5p	Low																	0.330333
MIMAT0027664	miR-6882-5p	Low																														0.370139
MIMAT0027666	miR-6883-5p	Medium														0.998782
MIMAT0027667	miR-6883-3p	Low						0.688078
MIMAT0027668	miR-6884-5p	Low									-0.463461
MIMAT0027670	miR-6885-5p	Medium																										-0.522354
MIMAT0027671	miR-6885-3p	Low																								-0.402759
MIMAT0027675	miR-6887-3p	Low																								-0.364585
MIMAT0027677	miR-6888-3p	Medium																										-0.494049
MIMAT0027682	miR-6891-5p	Medium																	0.339527
MIMAT0027683	miR-6891-3p	Medium																																-0.829028
MIMAT0028111	miR-7107-5p	Low					0.963224
MIMAT0028113	miR-7108-5p	Low						0.719896
MIMAT0028116	miR-7109-3p	Medium																														0.531758
MIMAT0028119	miR-7111-5p	Low																												0.908383
MIMAT0028124	miR-7113-3p	Medium														-0.553466
MIMAT0028125	miR-7114-5p	Medium																																-0.3914
MIMAT0028221	miR-7155-3p	Low				-0.309991
MIMAT0028222	miR-7156-5p	Low																														-0.383542
MIMAT0028225	miR-7157-3p	Medium																									-0.820048
MIMAT0028226	miR-7158-5p	Low					-0.901326
MIMAT0028233	miR-7161-3p	Low																								-0.90859
MIMAT0029782	miR-7641	Medium												0.531325
MIMAT0030018	miR-7703	Low																														0.473484
MIMAT0030020	miR-7705	Low																														0.446273
MIMAT0030411	miR-7843-5p	Low																	0.78744
MIMAT0030420	miR-7845-5p	Medium																										-0.37295
MIMAT0030421	miR-7846-3p	Low																														0.32504
MIMAT0030423	miR-7848-3p	Low						0.489394
MIMAT0030430	miR-7855-5p	Medium						0.717364
MIMAT0031175	miR-548ba	Low																					0.507209

## Sheet: Table S6
Table S6. Correlation analysis between IL6R gene expression and expression levels of miRNAs related to IL6R (mirDIP tool) in all TCGA tumors. In table are reported the miRNAs showing Pearson’s r ≥ 0.3 or ≤ -0.3 , p ≤ 0.05. The mirDIP Score class for each miRNA is listed
MIMAT (human)	miRNA ID (human)	mirDIP Score class for IL6R	LAML	ACC	CHOL	BLCA	BRCA	CESC	COAD	UCEC	ESCA	GBM	HNSC	KICH	KIRC	KIRP	DLBC	LIHC	LGG	LUAD	LUSC	SKCM	MESO	UVM	OV	PAAD	PCPG	PRAD	READ	SARC	STAD	TGCT	THYM	THCA	UCS
MIMAT0004481	let-7a-3p	Medium																												-0.482512					-0.347908
MIMAT0010195	let-7a-2-3p	Medium															-0.450258													-0.405639		-0.473964
MIMAT0000063	let-7b-5p	Very High											0.313659
MIMAT0004482	let-7b-3p	Medium															-0.305608
MIMAT0000064	let-7c-5p	Very High																	0.301701							0.353328						-0.417017
MIMAT0026472	let-7c-3p	Low															-0.322953													-0.317012		-0.511584
MIMAT0000065	let-7d-5p	Very High		-0.305796													-0.33418												-0.345281			-0.320667
MIMAT0004484	let-7d-3p	Medium															-0.456031													-0.371163		-0.328091
MIMAT0000066	let-7e-5p	Very High			-0.385479																											-0.522034
MIMAT0004485	let-7e-3p	Medium															-0.557304													-0.413745		-0.538629
MIMAT0000067	let-7f-5p	Very High			-0.525641
MIMAT0004486	let-7f-1-3p	Medium															-0.383118																-0.391565
MIMAT0004487	let-7f-2-3p	Medium																												-0.32657
MIMAT0000068	miR-15a-5p	High											-0.345943																			-0.417173	-0.565496
MIMAT0004488	miR-15a-3p	Medium															-0.457109							0.435773						-0.305882			-0.584943
MIMAT0000069	miR-16-5p	High															-0.363622																-0.530963
MIMAT0004489	miR-16-1-3p	Medium																														0.316603	-0.581783
MIMAT0000070	miR-17-5p	Very High							-0.364161																			-0.312839					-0.524247
MIMAT0000071	miR-17-3p	Medium																												-0.312189			-0.555555
MIMAT0000072	miR-18a-5p	Medium							-0.30582											-0.346593	-0.33973												-0.560009
MIMAT0002891	miR-18a-3p	Medium																												-0.319659		0.467794	-0.446822
MIMAT0004490	miR-19a-5p	Medium																						-0.977327		0.829291	0.974038		-0.592766
MIMAT0000073	miR-19a-3p	Medium							-0.306832				-0.323898																	-0.359179			-0.56562
MIMAT0004491	miR-19b-1-5p	Medium																														0.50456	-0.52523
MIMAT0000074	miR-19b-3p	Medium							-0.321907				-0.354693															-0.32713		-0.421318			-0.561596
MIMAT0004492	miR-19b-2-5p	Medium							-0.998855											-0.464798										-0.835756
MIMAT0000075	miR-20a-5p	High							-0.325668																			-0.329947					-0.521135
MIMAT0004493	miR-20a-3p	Medium															-0.377173											-0.346444		-0.414772			-0.460318
MIMAT0000076	miR-21-5p	Very High								0.304969							0.452679	-0.337607	0.30666													0.301171		0.381026
MIMAT0004494	miR-21-3p	Medium																	0.335266															0.392721
MIMAT0004495	miR-22-5p	Medium													-0.379687															-0.338894
MIMAT0000077	miR-22-3p	Very High	0.315561																										0.302933				0.339779
MIMAT0000078	miR-23a-3p	Very High															-0.38278		0.409353
MIMAT0000079	miR-24-1-5p	Medium															-0.438542															-0.474431
MIMAT0000080	miR-24-3p	High	0.321272										0.313644											0.309678								-0.549227
MIMAT0004497	miR-24-2-5p	Medium			-0.329605														0.370651					0.369007								-0.429547
MIMAT0004498	miR-25-5p	Medium															-0.361531															0.6843	-0.522561		-0.301067
MIMAT0000081	miR-25-3p	Medium															-0.521529				-0.365729							-0.33122				0.341819	-0.561999
MIMAT0000082	miR-26a-5p	Medium																					0.46632	-0.36641
MIMAT0004499	miR-26a-1-3p	Medium															-0.598092
MIMAT0000083	miR-26b-5p	Medium																					0.355899									-0.464997
MIMAT0004500	miR-26b-3p	High															-0.469977													-0.311606
MIMAT0004501	miR-27a-5p	Medium																														0.319995		0.342272
MIMAT0000084	miR-27a-3p	High																	0.374628
MIMAT0000085	miR-28-5p	Medium																														-0.469137	-0.423384
MIMAT0004502	miR-28-3p	Medium															-0.321472		0.35196													-0.438492	-0.326896
MIMAT0004503	miR-29a-5p	Medium																															0.377686
MIMAT0000086	miR-29a-3p	Medium		0.324669		0.339107																	0.331771									0.350074	0.402127
MIMAT0000088	miR-30a-3p	Medium															-0.375076		0.361893												0.321796
MIMAT0004504	miR-31-3p	Medium																												-0.352782
MIMAT0000090	miR-32-5p	Medium															-0.300807													-0.388109			-0.461807
MIMAT0004505	miR-32-3p	Medium							-0.326804																					-0.329779			-0.47924		-0.329092
MIMAT0000091	miR-33a-5p	Medium															-0.489442													-0.344835			-0.533788
MIMAT0004506	miR-33a-3p	Medium															-0.384957																-0.371647		-0.347874
MIMAT0004507	miR-92a-1-5p	Medium							-0.326271															-0.379781								0.609576	-0.577682
MIMAT0000092	miR-92a-3p	Medium							-0.367326								-0.397519							-0.362327						-0.331419			-0.55019
MIMAT0004508	miR-92a-2-5p	High									0.992971		-0.615319																	-0.827513
MIMAT0000093	miR-93-5p	High				-0.325232							-0.310606								-0.329916							-0.372762					-0.517979
MIMAT0004509	miR-93-3p	Medium																										-0.317364		-0.330981			-0.499929
MIMAT0026473	miR-95-5p	Medium			-0.85279																-0.364483														-0.519074
MIMAT0000094	miR-95-3p	Medium																						-0.313868					-0.360684
MIMAT0000095	miR-96-5p	Medium				-0.315246			-0.379369	-0.333539											-0.352083					-0.311131		-0.391757	-0.358683	-0.376006	-0.439816	0.596819		-0.410818
MIMAT0004510	miR-96-3p	Medium																								-0.432057			-0.409031			0.570603
MIMAT0000096	miR-98-5p	Very High												0.319118																		-0.450179
MIMAT0022842	miR-98-3p	Medium												0.306246																		-0.326119
MIMAT0000097	miR-99a-5p	Medium																					0.356657			0.41386					0.320566	-0.41128
MIMAT0004511	miR-99a-3p	Medium																								0.302142						-0.513321
MIMAT0000098	miR-100-5p	Medium																0.314651								0.346913					0.316911
MIMAT0004512	miR-100-3p	Medium									-0.315653																0.35961			-0.402603		-0.473851
MIMAT0004513	miR-101-5p	Medium		0.328156																			0.388204									0.480465
MIMAT0000099	miR-101-3p	Medium													0.391549			0.337211		0.371313			0.424798			0.40994						0.44817
MIMAT0004514	miR-29b-1-5p	Medium																														0.56534
MIMAT0000100	miR-29b-3p	Medium		0.341917																												0.368334	0.368675
MIMAT0004515	miR-29b-2-5p	High															-0.316873			0.310819			0.3094		0.338364								0.312175
MIMAT0009196	miR-103a-2-5p	High											-0.302305																	-0.303698
MIMAT0000101	miR-103a-3p	Medium																												-0.366472		-0.491891
MIMAT0000102	miR-105-5p	High													-0.549573																	0.451353
MIMAT0004516	miR-105-3p	Medium																												-0.424657		0.555689
MIMAT0000103	miR-106a-5p	High																											-0.34651			-0.434238	-0.530277
MIMAT0004517	miR-106a-3p	Medium											-0.453397		-0.329442					-0.308649									-0.584362				-0.5324
MIMAT0000104	miR-107	Medium															-0.337454
MIMAT0004518	miR-16-2-3p	Medium															-0.321317															0.429551	-0.539944
MIMAT0000222	miR-192-5p	Medium															-0.348741	0.385228
MIMAT0004543	miR-192-3p	Medium																0.335141												-0.315357
MIMAT0000226	miR-196a-5p	High																														-0.326941
MIMAT0022691	miR-197-5p	Medium																										-0.367564
MIMAT0000227	miR-197-3p	Medium															-0.312583													-0.395032		-0.354953
MIMAT0000228	miR-198	Medium																												-0.448889		0.746614
MIMAT0000231	miR-199a-5p	Medium			-0.369303																									-0.376267		-0.512919
MIMAT0000232	miR-199a-3p	Medium			-0.352991																									-0.353791		-0.481037		0.308431
MIMAT0000241	miR-208a-3p	High								-0.997915
MIMAT0000242	miR-129-5p	Very High															-0.585231									0.352125
MIMAT0004548	miR-129-1-3p	Medium	-0.465415																																0.466626
MIMAT0004549	miR-148a-5p	Medium																0.352236															-0.33845
MIMAT0000243	miR-148a-3p	Medium																0.473403
MIMAT0000244	miR-30c-5p	Medium											-0.301681															-0.312685						-0.337224
MIMAT0000245	miR-30d-5p	High																		0.40156													0.360896		0.371123
MIMAT0004551	miR-30d-3p	Medium																		0.32952				0.321446						-0.347787
MIMAT0000250	miR-139-5p	High																					0.380841			0.370192					0.325536	0.332185
MIMAT0004552	miR-139-3p	Medium							0.324507				0.310085										0.35881			0.39113		0.329703	0.305789		0.321313	0.499275
MIMAT0000251	miR-147a	Medium																		-0.957934
MIMAT0000252	miR-7-5p	Very High																															-0.479088
MIMAT0004553	miR-7-1-3p	Medium															-0.410367													-0.311793		0.501497	-0.47832
MIMAT0004554	miR-7-2-3p	Medium		0.38804				-0.316718										0.316665				-0.375104								-0.311768		-0.304777
MIMAT0000253	miR-10a-5p	High																					0.314197
MIMAT0004555	miR-10a-3p	Low		-0.349879	-0.418785												-0.401714						0.332198
MIMAT0000255	miR-34a-5p	Very High											-0.414822																	-0.314539
MIMAT0004557	miR-34a-3p	Medium											-0.301201																	-0.313875
MIMAT0000256	miR-181a-5p	Medium		0.304483													-0.338664													-0.409186		-0.389628	-0.51567
MIMAT0004558	miR-181a-2-3p	Medium															-0.487025													-0.31967		-0.604967	-0.490218
MIMAT0000257	miR-181b-5p	Medium	-0.301261																											-0.3533		-0.49431	-0.517132
MIMAT0022692	miR-181b-3p	Medium															-0.5545													-0.466529		-0.328592	-0.550731
MIMAT0000258	miR-181c-5p	Medium			-0.482578									0.362201
MIMAT0004559	miR-181c-3p	Low			-0.5187				-0.309082									-0.302856															-0.371633
MIMAT0000259	miR-182-5p	High							-0.306575	-0.31321							-0.337291											-0.339993			-0.426224	0.613495		-0.303587
MIMAT0000260	miR-182-3p	Medium																												-0.82781		0.554612
MIMAT0000261	miR-183-5p	Medium								-0.334521							-0.31985													-0.307702	-0.437953	0.540141		-0.343813
MIMAT0004560	miR-183-3p	Medium																												-0.482735	-0.31752	0.593334
MIMAT0000262	miR-187-3p	Medium																							0.41603							0.406179
MIMAT0004562	miR-196a-3p	Medium																													-0.310866
MIMAT0000263	miR-199b-5p	Medium			-0.430535																									-0.344264		-0.515975		0.320978
MIMAT0004563	miR-199b-3p	Medium			-0.352872																									-0.353635		-0.481057		0.308365
MIMAT0000264	miR-203a-3p	Medium																													-0.307358	-0.535599
MIMAT0000265	miR-204-5p	Very High													0.367746											0.420268						-0.44285
MIMAT0022693	miR-204-3p	Medium																										-0.309193			-0.370638	-0.400101		-0.308734
MIMAT0000266	miR-205-5p	Medium																														-0.457165
MIMAT0009197	miR-205-3p	Medium														-0.491894				-0.392366		-0.348229
MIMAT0026475	miR-210-5p	Medium															-0.38323													-0.324847
MIMAT0000267	miR-210-3p	Medium															-0.479745			-0.33918						-0.333783				-0.352069	-0.317019
MIMAT0000268	miR-211-5p	Very High																						-0.317238						-0.320319					0.407637
MIMAT0022694	miR-211-3p	Medium																						-0.334918
MIMAT0022695	miR-212-5p	Medium								-0.320844																				-0.334525		-0.36875
MIMAT0000269	miR-212-3p	Very High																								0.399927
MIMAT0000270	miR-181a-3p	Medium			-0.357661												-0.444068													-0.465818		-0.368307	-0.548626
MIMAT0004564	miR-214-5p	Medium			-0.346295																									-0.426691		-0.547453
MIMAT0000271	miR-214-3p	High	-0.442495		-0.548058										-0.321334															-0.363061		-0.603551
MIMAT0000272	miR-215-5p	Medium																														-0.475638
MIMAT0026476	miR-215-3p	Medium					-0.308836										-0.855188			-0.458423												-0.521088			-0.679771
MIMAT0000273	miR-216a-5p	Medium																							-0.311109
MIMAT0022844	miR-216a-3p	Medium		0.647068																								-0.337555
MIMAT0000274	miR-217	Medium															-0.357947
MIMAT0000275	miR-218-5p	Medium		-0.305275	-0.443952																					0.387949				-0.36411		-0.467012
MIMAT0004565	miR-218-1-3p	Medium		-0.374863	-0.391706												-0.415687															-0.349824
MIMAT0004566	miR-218-2-3p	High																-0.639491								-0.519176
MIMAT0000276	miR-219a-5p	Medium																												-0.399721		-0.443801		-0.380668
MIMAT0004567	miR-219a-1-3p	Medium																												-0.364207
MIMAT0004568	miR-221-5p	Medium											0.367914
MIMAT0000278	miR-221-3p	High													-0.380286
MIMAT0000279	miR-222-3p	Medium													-0.352795
MIMAT0004570	miR-223-5p	Medium				0.306573													0.319857								0.331298							0.433442	0.305799
MIMAT0000280	miR-223-3p	Medium															0.395939		0.330343								0.315447		0.319018					0.455855
MIMAT0000281	miR-224-5p	Medium																															0.349203
MIMAT0009198	miR-224-3p	Medium		0.345885																												-0.37386
MIMAT0004571	miR-200b-5p	Low							-0.302293																					-0.479132	-0.352332	-0.469725
MIMAT0000318	miR-200b-3p	Medium				-0.335184																									-0.362516	-0.642485
MIMAT0004584	let-7g-3p	Medium															-0.571021													-0.313276
MIMAT0000415	let-7i-5p	Very High			-0.434245
MIMAT0004585	let-7i-3p	Medium															-0.340303
MIMAT0000416	miR-1-3p	Medium																						0.437146						0.342142		-0.555163
MIMAT0000417	miR-15b-5p	High																														-0.303752	-0.544923		-0.307026
MIMAT0004586	miR-15b-3p	Medium															-0.357171																-0.53901
MIMAT0004587	miR-23b-5p	Medium																														-0.336527
MIMAT0000418	miR-23b-3p	Very High															-0.567379															-0.483458
MIMAT0004588	miR-27b-5p	Medium															-0.310487															0.306876
MIMAT0000419	miR-27b-3p	High															-0.456124															-0.536418
MIMAT0000420	miR-30b-5p	High																										-0.306604				-0.351886
MIMAT0004589	miR-30b-3p	High															-0.447752
MIMAT0000421	miR-122-5p	High							-0.368524									0.361304							-0.41393							-0.47447
MIMAT0004590	miR-122-3p	Low							-0.939043									0.382622
MIMAT0004591	miR-124-5p	Medium	-0.521058										-0.803075									-0.623773								-0.546317
MIMAT0000422	miR-124-3p	Very High		-0.362433									-0.363276								-0.30569									-0.363108
MIMAT0000423	miR-125b-5p	Very High															-0.321398									0.319597				-0.367265		-0.425502
MIMAT0004592	miR-125b-1-3p	Medium															-0.314962													-0.39129		-0.526772
MIMAT0026477	miR-128-1-5p	Medium		-0.327592													-0.460192															0.403325	-0.347423
MIMAT0000424	miR-128-3p	High															-0.43341																-0.527083
MIMAT0004593	miR-130a-5p	Very High		-0.364755													-0.345602							-0.321336						-0.369539			-0.365227
MIMAT0000425	miR-130a-3p	Medium		-0.404178	-0.359744																									-0.416933		-0.344827	-0.327228
MIMAT0004594	miR-132-5p	Medium															-0.42758									0.327893
MIMAT0000426	miR-132-3p	High							0.34791																	0.355269				-0.357827
MIMAT0026478	miR-133a-5p	Medium																				0.436359										-0.422385
MIMAT0000427	miR-133a-3p	High																						0.409147								-0.556623
MIMAT0000428	miR-135a-5p	Medium																														-0.590629
MIMAT0004595	miR-135a-3p	Medium				-0.307029		0.364616													-0.337145	-0.314241										-0.58652
MIMAT0000429	miR-137	High																												-0.302105		-0.416042
MIMAT0000430	miR-138-5p	Very High																												-0.368901
MIMAT0004596	miR-138-2-3p	Medium					0.494061																								-0.725157
MIMAT0000431	miR-140-5p	High															-0.309584													-0.342496			-0.455628
MIMAT0004597	miR-140-3p	High																								0.43745							-0.376519
MIMAT0004598	miR-141-5p	High												-0.331351																		0.338482
MIMAT0000432	miR-141-3p	High							-0.302571																			-0.314229						-0.307389
MIMAT0000433	miR-142-5p	Medium					0.34885										-0.356946		0.385927													0.475703	-0.496796	0.560859
MIMAT0000434	miR-142-3p	Medium					0.333295												0.402253													0.509168	-0.493689	0.51052
MIMAT0004599	miR-143-5p	High															-0.334681															-0.361253
MIMAT0000435	miR-143-3p	Very High											0.324579															0.309913		0.408237
MIMAT0004600	miR-144-5p	Low																											0.334486
MIMAT0000437	miR-145-5p	Medium																														-0.312468
MIMAT0026479	miR-152-5p	Medium																														-0.419779
MIMAT0000438	miR-152-3p	Medium											0.379494				-0.521828		0.352581									0.40875				-0.472079
MIMAT0000439	miR-153-3p	Medium		-0.351348																												-0.305302
MIMAT0000440	miR-191-5p	Medium				-0.338992			-0.384709								-0.373718													-0.375361		-0.351884
MIMAT0001618	miR-191-3p	Medium															-0.540348																-0.311341
MIMAT0000441	miR-9-5p	Very High		-0.318613
MIMAT0000442	miR-9-3p	Medium		-0.338868	0.381692											-0.302226
MIMAT0004602	miR-125a-3p	Medium			-0.346235												-0.315237													-0.3421
MIMAT0004603	miR-125b-2-3p	Low															-0.369359									0.416364						-0.440754
MIMAT0000444	miR-126-5p	Medium															-0.362558
MIMAT0004604	miR-127-5p	Medium															-0.500703													-0.41815
MIMAT0000446	miR-127-3p	Medium															-0.387593													-0.396715
MIMAT0004605	miR-129-2-3p	High															-0.449699															-0.357143
MIMAT0000447	miR-134-5p	Medium															-0.435089													-0.416761
MIMAT0026481	miR-134-3p	Medium													-0.445907		-0.40431													-0.316188
MIMAT0000448	miR-136-5p	Medium															-0.359635													-0.407977
MIMAT0004606	miR-136-3p	Medium																												-0.420147
MIMAT0004607	miR-138-1-3p	Medium	0.610726																											-0.366192
MIMAT0000449	miR-146a-5p	High					0.324536																									0.43633		0.391387
MIMAT0004608	miR-146a-3p	Medium									-0.354756																			-0.400023
MIMAT0000450	miR-149-5p	High		-0.343263												-0.306929	-0.314758													-0.360474
MIMAT0004609	miR-149-3p	High																												-0.329358
MIMAT0000451	miR-150-5p	High					0.399917		0.406932														0.406202			0.378575					0.315142	0.468633		0.559349
MIMAT0004610	miR-150-3p	Medium				0.311399	0.41305																0.304853			0.395372						0.434017	-0.328893	0.508894
MIMAT0000452	miR-154-5p	Medium																												-0.353067
MIMAT0000453	miR-154-3p	Medium																												-0.397891
MIMAT0000454	miR-184	Medium																						-0.341999								0.546416
MIMAT0000455	miR-185-5p	High																															-0.385618
MIMAT0004611	miR-185-3p	Medium											0.304907				-0.322056															0.340124
MIMAT0000456	miR-186-5p	Medium																												-0.335466		-0.50355	-0.390798
MIMAT0004612	miR-186-3p	Medium																												-0.391389
MIMAT0000457	miR-188-5p	Medium		0.339464																												-0.389731
MIMAT0004613	miR-188-3p	High	0.355148		0.461158												-0.342737															-0.489399
MIMAT0000458	miR-190a-5p	Medium																					0.311445
MIMAT0026482	miR-190a-3p	Medium																												-0.354837
MIMAT0004614	miR-193a-5p	High																	0.31456
MIMAT0000459	miR-193a-3p	Medium																												-0.321649
MIMAT0000460	miR-194-5p	High													0.306671			0.38464
MIMAT0000461	miR-195-5p	High																								0.338256					0.341702	0.360072
MIMAT0004615	miR-195-3p	Medium																								0.381675					0.37437	0.56875
MIMAT0000462	miR-206	High															-0.344404										0.421394					-0.489562
MIMAT0000510	miR-320a	Very High																						-0.370418
MIMAT0004657	miR-200c-5p	Medium																												-0.388354
MIMAT0000617	miR-200c-3p	Medium																														-0.314327	0.363473
MIMAT0000646	miR-155-5p	Very High																							0.332375							0.379666	-0.332361	0.486698
MIMAT0004658	miR-155-3p	Low																														0.390614	-0.318321	0.388779
MIMAT0031095	miR-128-2-5p	Medium																															-0.393925
MIMAT0004671	miR-194-3p	Medium															-0.30749	0.317071
MIMAT0000680	miR-106b-5p	High			-0.426582				-0.343199		-0.30706						-0.380849				-0.419776												-0.550835
MIMAT0004672	miR-106b-3p	Medium															-0.58633																-0.492459
MIMAT0004673	miR-29c-5p	Low															-0.494284						0.378253											-0.309835
MIMAT0000681	miR-29c-3p	Medium		0.355751					0.365329														0.381158							0.313661		0.345742
MIMAT0004674	miR-30c-1-3p	Medium															-0.554725													-0.332601		0.394196
MIMAT0001620	miR-200a-5p	Low				-0.330383																								-0.31862	-0.331485	-0.602987
MIMAT0000682	miR-200a-3p	High				-0.36197																		0.353842						-0.325543	-0.359239	-0.656612
MIMAT0000683	miR-302a-5p	Medium						0.779562
MIMAT0000684	miR-302a-3p	High				0.6718
MIMAT0004675	miR-219a-2-3p	Medium														-0.345524					-0.352429									-0.444544
MIMAT0000685	miR-34b-5p	Medium													-0.324374
MIMAT0004676	miR-34b-3p	High													-0.323784							-0.300702		-0.329654
MIMAT0004677	miR-34c-3p	Medium													-0.352589
MIMAT0002890	miR-299-5p	Medium																												-0.417086
MIMAT0000687	miR-299-3p	Medium													-0.474621		-0.408365													-0.301291		0.330643
MIMAT0022696	miR-301a-5p	Medium		-0.302375													-0.37079															-0.61684	-0.306378
MIMAT0000688	miR-301a-3p	Medium																														-0.639899
MIMAT0000689	miR-99b-5p	Low															-0.498814															-0.498032		-0.301638
MIMAT0004678	miR-99b-3p	Medium															-0.420904															-0.400321
MIMAT0000690	miR-296-5p	Medium															-0.433163							-0.363915
MIMAT0004679	miR-296-3p	High													-0.341545		-0.526282
MIMAT0004680	miR-130b-5p	Medium							-0.308641								-0.416469			-0.315326				-0.362534						-0.352948		-0.41842	-0.534056
MIMAT0000691	miR-130b-3p	Medium							-0.319346						-0.318942					-0.387416	-0.33146									-0.32117		-0.434363	-0.600498
MIMAT0000692	miR-30e-5p	High															-0.375047	0.329441														0.391894
MIMAT0000693	miR-30e-3p	Medium															-0.572025		0.372209													0.422928
MIMAT0004681	miR-26a-2-3p	Medium																															-0.422915
MIMAT0000703	miR-361-5p	Medium																												-0.32164			-0.313539
MIMAT0004682	miR-361-3p	High															-0.30638								0.306978							0.315525
MIMAT0000705	miR-362-5p	Medium		0.322853									-0.394865																-0.305919			-0.498515
MIMAT0004683	miR-362-3p	Medium																							-0.376172
MIMAT0003385	miR-363-5p	Medium															-0.682793																-0.453506
MIMAT0000707	miR-363-3p	Medium																						-0.336792								-0.535443	-0.484095
MIMAT0009199	miR-365a-5p	Medium																														0.382995
MIMAT0000710	miR-365a-3p	Medium																												-0.417798
MIMAT0022833	miR-365b-5p	Medium																												-0.371105
MIMAT0022834	miR-365b-3p	Medium																												-0.418292
MIMAT0000714	miR-302b-5p	Medium								-0.999769
MIMAT0004685	miR-302d-5p	Medium								-0.999299
MIMAT0022861	miR-376c-5p	Medium																							-0.584892
MIMAT0000720	miR-376c-3p	Medium													-0.368592										-0.31821					-0.404777
MIMAT0001621	miR-369-5p	Medium													-0.300919															-0.30964
MIMAT0000721	miR-369-3p	Medium																							-0.319607					-0.43668
MIMAT0026483	miR-370-5p	Medium															-0.311973													-0.341552
MIMAT0000722	miR-370-3p	High															-0.354245													-0.409767
MIMAT0004687	miR-371a-5p	Very High																												-0.647319		0.519616		-0.373468
MIMAT0000723	miR-371a-3p	Medium						-0.545766																						-0.503362	0.302209	0.518866		-0.415768
MIMAT0026484	miR-372-5p	Low																														0.46465
MIMAT0000724	miR-372-3p	High																												-0.306854		0.513009			-0.441
MIMAT0000725	miR-373-5p	Medium																														0.557459
MIMAT0000726	miR-373-3p	High						-0.368982																			-0.426525			-0.428105		0.503566		-0.331482
MIMAT0000727	miR-374a-5p	Medium			-0.356352																												-0.330518
MIMAT0004688	miR-374a-3p	Medium																												-0.331372		0.438046	-0.328885
MIMAT0000728	miR-375	Medium																														-0.663471	-0.334437
MIMAT0003386	miR-376a-5p	Medium	-0.369358	-0.31107											-0.318654															-0.300001		-0.311338
MIMAT0000729	miR-376a-3p	Medium													-0.421692															-0.319179
MIMAT0004689	miR-377-5p	Medium	-0.378661
MIMAT0000730	miR-377-3p	Medium													-0.367152
MIMAT0000731	miR-378a-5p	Medium															-0.337431															0.540898	-0.426302
MIMAT0000732	miR-378a-3p	High		0.346879																												0.585363	-0.50916
MIMAT0000733	miR-379-5p	Medium															-0.465967													-0.401115
MIMAT0004690	miR-379-3p	Medium	-0.453094												-0.449259									-0.682986						-0.33329
MIMAT0000734	miR-380-5p	Low													-0.478131							-0.321351			-0.364595
MIMAT0000735	miR-380-3p	Medium													-0.467397
MIMAT0022862	miR-381-5p	Medium	-0.396973																											-0.306786
MIMAT0000736	miR-381-3p	Medium															-0.367192													-0.393606		0.365189
MIMAT0000737	miR-382-5p	Medium																												-0.360541
MIMAT0022697	miR-382-3p	High															-0.34097								-0.33143					-0.314721
MIMAT0000738	miR-383-5p	Medium		-0.445566									-0.332668		-0.690072		-0.478253			-0.324412						0.364846						-0.436312
MIMAT0026485	miR-383-3p	Medium		-0.940337														0.419776										-0.350046
MIMAT0004692	miR-340-5p	Medium												0.381614			0.34747													-0.300216
MIMAT0000750	miR-340-3p	Medium																												-0.406966
MIMAT0000751	miR-330-3p	High												0.303018												0.328849
MIMAT0026486	miR-328-5p	Medium												-0.637056				0.311749
MIMAT0000752	miR-328-3p	High															-0.459515																	-0.339707
MIMAT0004694	miR-342-5p	High							0.302185														0.318877			0.364182							-0.327403
MIMAT0000753	miR-342-3p	Medium																					0.35612			0.364825							-0.308712
MIMAT0004695	miR-337-5p	Medium								-0.308113					-0.571396
MIMAT0000754	miR-337-3p	Medium															-0.379906													-0.424108
MIMAT0004696	miR-323a-5p	Medium																				-0.304512				-0.322451				-0.38466		-0.327671			0.461154
MIMAT0000755	miR-323a-3p	Medium															-0.444943													-0.357575
MIMAT0000756	miR-326	High															-0.316023									0.315102
MIMAT0004697	miR-151a-5p	Medium							-0.302782								-0.452422													-0.431292				-0.301382
MIMAT0000757	miR-151a-3p	Medium															-0.563141													-0.33869		0.313745
MIMAT0000758	miR-135b-5p	Medium																						0.484272		-0.369756				-0.310675
MIMAT0004698	miR-135b-3p	Medium		0.886365											-0.512707									0.469745								0.621074
MIMAT0004699	miR-148b-5p	Medium																														-0.510558	-0.36597
MIMAT0000759	miR-148b-3p	Medium																																-0.304585
MIMAT0004700	miR-331-5p	High															-0.465358																-0.528872
MIMAT0000760	miR-331-3p	High															-0.536269															-0.432458
MIMAT0000761	miR-324-5p	Medium		-0.436557																										-0.379315		-0.604765
MIMAT0000762	miR-324-3p	High															-0.416958									0.308569				-0.397989		-0.582317
MIMAT0004701	miR-338-5p	Medium																														-0.581081
MIMAT0000763	miR-338-3p	High																														-0.650785
MIMAT0000764	miR-339-5p	Medium							-0.300159							-0.336885
MIMAT0004702	miR-339-3p	Medium															-0.352887
MIMAT0000765	miR-335-5p	High												0.379272																		-0.543971
MIMAT0004703	miR-335-3p	High							-0.308726																							-0.363284		-0.347495
MIMAT0000770	miR-133b	High																						0.306469								-0.561386
MIMAT0000772	miR-345-5p	Medium																																-0.32689
MIMAT0022698	miR-345-3p	Medium		-0.538028
MIMAT0000773	miR-346	Medium															-0.47937
MIMAT0001080	miR-196b-5p	High															-0.317			-0.339123											-0.385466	-0.464142	-0.559877
MIMAT0009201	miR-196b-3p	Medium							-0.306826				-0.341663							-0.347654						-0.482751							-0.473648
MIMAT0001339	miR-422a	High									-0.521347									-0.845659										-0.487821
MIMAT0004748	miR-423-5p	High														-0.301419								-0.34173				-0.401877				-0.35148
MIMAT0001340	miR-423-3p	High																												-0.334688		-0.355605
MIMAT0001341	miR-424-5p	High																												-0.311586		-0.486334	-0.486704
MIMAT0004749	miR-424-3p	Medium																														-0.404112	-0.452037
MIMAT0003393	miR-425-5p	Medium							-0.326351																								-0.333164
MIMAT0001343	miR-425-3p	Medium															-0.393046													-0.316685			-0.305906
MIMAT0001412	miR-18b-5p	Medium																		-0.301787												-0.43513	-0.561886
MIMAT0004751	miR-18b-3p	Medium											-0.424129											-0.486442									-0.410528
MIMAT0001413	miR-20b-5p	Very High											-0.331703																			-0.450129	-0.477067
MIMAT0004752	miR-20b-3p	Medium											-0.345869							-0.337281				-0.409154								-0.370172	-0.491549
MIMAT0001532	miR-448	Medium				0.477424														-0.639824
MIMAT0001536	miR-429	Medium				-0.357782																								-0.355709	-0.3633	-0.649602
MIMAT0001541	miR-449a	Very High																														-0.319116
MIMAT0001545	miR-450a-5p	Medium							-0.317211																							-0.577202	-0.529095
MIMAT0022700	miR-450a-1-3p	Medium																														-0.527635
MIMAT0004757	miR-431-3p	Medium															-0.438564													-0.406163
MIMAT0026554	miR-433-5p	Medium		-0.332832					-0.359546						-0.865894					-0.303867					-0.606838			-0.36828				-0.415343
MIMAT0001627	miR-433-3p	Medium															-0.455278													-0.348275		-0.3356
MIMAT0026555	miR-329-5p	Medium							-0.479654						-0.866809										-0.368275				-0.683067			-0.375441			0.487046
MIMAT0001629	miR-329-3p	Medium													-0.368784							-0.318631								-0.319609		-0.323045
MIMAT0001635	miR-452-5p	Medium																														-0.317418
MIMAT0001636	miR-452-3p	Medium	-0.330662
MIMAT0001638	miR-409-5p	Medium															-0.526256													-0.335945		-0.380248
MIMAT0001639	miR-409-3p	Medium															-0.344932													-0.396938
MIMAT0026557	miR-412-5p	Low															-0.517769															-0.392833
MIMAT0002170	miR-412-3p	Medium													-0.908438															-0.357913	-0.414311	-0.338809
MIMAT0026558	miR-410-5p	Medium													-0.624108										-0.369209										0.38232
MIMAT0002171	miR-410-3p	Medium																												-0.413129		-0.369096
MIMAT0022923	miR-376b-5p	Low																							-0.678414
MIMAT0002172	miR-376b-3p	Medium	-0.441013												-0.321557												-0.301232			-0.408696
MIMAT0004761	miR-483-5p	Medium															-0.407196															-0.413566
MIMAT0002173	miR-483-3p	Medium																						-0.50114								-0.429857
MIMAT0002174	miR-484	Very High																												-0.37857			-0.389885
MIMAT0002175	miR-485-5p	High													-0.434724
MIMAT0002176	miR-485-3p	Medium																												-0.372416
MIMAT0002177	miR-486-5p	Medium																					0.315401
MIMAT0004762	miR-486-3p	Medium			-0.474008
MIMAT0026559	miR-487a-5p	Low	-0.456645														-0.436155													-0.334419		-0.317692
MIMAT0002178	miR-487a-3p	Medium													-0.306682
MIMAT0002804	miR-488-5p	Medium		-0.500709									-0.536365									-0.474951
MIMAT0004763	miR-488-3p	Medium		-0.375033									-0.424233
MIMAT0026605	miR-489-5p	Medium																-0.458877
MIMAT0002805	miR-489-3p	Medium		0.386907																									-0.345623
MIMAT0004764	miR-490-5p	Medium		-0.665409									-0.8133							-0.370297									-0.354119			-0.350638		0.998512
MIMAT0002806	miR-490-3p	High											-0.372817			-0.459022						-0.381646										-0.504142
MIMAT0002807	miR-491-5p	Very High																												-0.354001		-0.345807
MIMAT0004765	miR-491-3p	Medium															-0.464686													-0.420791		-0.316185
MIMAT0002808	miR-511-5p	High					0.34763																											0.393732
MIMAT0026606	miR-511-3p	#N/A													-0.37992
MIMAT0002809	miR-146b-5p	High															0.588002													-0.385693		0.423592
MIMAT0004766	miR-146b-3p	Medium					0.336278		0.348714																				0.301866	-0.414756		0.479613
MIMAT0002810	miR-202-5p	Medium																						-0.891678					0.366991
MIMAT0002811	miR-202-3p	Very High						-0.700929	-0.597489										0.459658
MIMAT0002812	miR-492	Medium							-0.541284																	-0.788708
MIMAT0002813	miR-493-5p	Medium																												-0.401536
MIMAT0003161	miR-493-3p	Medium	-0.354657																											-0.413899
MIMAT0002814	miR-432-5p	Medium																												-0.377358
MIMAT0002815	miR-432-3p	Medium																-0.340115								-0.323766						-0.371546
MIMAT0026607	miR-494-5p	Medium									-0.486099				-0.788168													-0.31313
MIMAT0002816	miR-494-3p	Medium																												-0.369234
MIMAT0022924	miR-495-5p	Medium													-0.560211									-0.651049
MIMAT0002817	miR-495-3p	Very High																												-0.443838
MIMAT0002818	miR-496	High															-0.388829													-0.324946		-0.450253
MIMAT0004767	miR-193b-5p	High																0.371251						-0.304085						-0.30446		0.41439
MIMAT0002820	miR-497-5p	High															-0.379877									0.384317					0.410648
MIMAT0004768	miR-497-3p	Medium																														0.339806
MIMAT0002821	miR-181d-5p	Medium			-0.46492																														-0.31464
MIMAT0026608	miR-181d-3p	Low													-0.960513																	0.419649			-0.824454
MIMAT0002822	miR-512-5p	Medium														0.609366				-0.620338										-0.501133	0.371325			-0.358613
MIMAT0002823	miR-512-3p	Medium													-0.792973	0.343198				-0.363547										-0.457894		0.36471
MIMAT0002824	miR-498	Medium														0.645573				-0.542336										-0.599002				-0.409663
MIMAT0002825	miR-520e	High									0.555384						-0.797611			-0.703186										-0.588068				-0.549355
MIMAT0002826	miR-515-5p	High									0.354606					0.537842				-0.473036										-0.493973	0.361263			-0.416952
MIMAT0002827	miR-515-3p	Medium									0.405194					0.57282				-0.449836										-0.598467	0.413694			-0.360741
MIMAT0002828	miR-519e-5p	High									0.724677																				0.636821
MIMAT0002829	miR-519e-3p	Medium									0.724341													0.999071				-0.998858
MIMAT0002830	miR-520f-3p	Medium														0.600582				-0.620455										-0.518954	0.304463	0.381878		-0.515376
MIMAT0002832	miR-519c-3p	Medium									0.529644					0.568356				-0.571911										-0.523283				-0.366387
MIMAT0002833	miR-520a-5p	Medium		0.757765											-0.671972	0.554009				-0.524404										-0.483718		0.42188
MIMAT0002834	miR-520a-3p	High														0.372603				-0.361501										-0.466533		0.373042
MIMAT0002835	miR-526b-5p	High													-0.722156					-0.38348			-0.397934							-0.409823		0.323815
MIMAT0002836	miR-526b-3p	Medium														0.78774				-0.775324											0.501693
MIMAT0002837	miR-519b-3p	Medium									0.479371					0.634792				-0.567596						-0.755055				-0.542098				-0.527934
MIMAT0002838	miR-525-5p	Medium									0.330233				-0.816789	0.407436				-0.452684										-0.392496
MIMAT0002839	miR-525-3p	Medium		-0.847925							0.430286					0.564011				-0.471073										-0.569954				-0.305505
MIMAT0002840	miR-523-3p	Medium														0.752954				-0.534837										-0.5444				-0.36715
MIMAT0002841	miR-518f-5p	Low													-0.8596	0.593173				-0.524743										-0.503494		0.345069
MIMAT0002842	miR-518f-3p	Medium									0.567233					0.732788				-0.591455				-0.689104						-0.558704	0.360845			-0.452765
MIMAT0002843	miR-520b	High														0.628794				-0.648334										-0.550613		0.315807
MIMAT0002844	miR-518b	Medium													-0.816765	0.389652				-0.413937										-0.402069		0.30222
MIMAT0002846	miR-520c-3p	High														0.628105				-0.636079										-0.553228		0.31616		-0.424943
MIMAT0002847	miR-518c-5p	Medium													-0.841032	0.518962				-0.371622										-0.388966		0.393324
MIMAT0002848	miR-518c-3p	Medium			0.727171						0.320924					0.458729	-0.469275			-0.448152										-0.482116
MIMAT0002849	miR-524-5p	Medium														0.708907				-0.485049										-0.682251	0.589815			-0.425503
MIMAT0002850	miR-524-3p	Medium									0.712379					0.828742				-0.65815				-0.979178	-0.519732					-0.78328				-0.563022
MIMAT0002851	miR-517-5p	Medium														0.524633				-0.57261										-0.532683		0.307137		-0.343608
MIMAT0002852	miR-517a-3p	Medium													-0.95049	0.410419				-0.42608										-0.389221
MIMAT0002853	miR-519d-3p	High									0.344846					0.41275				-0.442905			-0.588							-0.471035		0.305851
MIMAT0002854	miR-521	Medium									0.506499																			-0.652311				-0.454092
MIMAT0002855	miR-520d-5p	Medium																												-0.638096				-0.428293
MIMAT0002856	miR-520d-3p	High									0.351337					0.455536				-0.539086										-0.53918				-0.390523
MIMAT0002857	miR-517b-3p	Medium													-0.95049	0.410497				-0.425933										-0.389221
MIMAT0026611	miR-520g-5p	Low																							-0.676286					-0.751493	0.815855			-0.506093
MIMAT0002858	miR-520g-3p	High									0.314471				-0.862095	0.632927				-0.418407						-0.460497				-0.446488	0.314594	0.313695		-0.317203
MIMAT0002859	miR-516b-5p	Medium													-0.683387	0.383866				-0.421686										-0.451206
MIMAT0002861	miR-518e-3p	Medium									0.375647					0.56838				-0.403466							0.487388			-0.461636
MIMAT0005457	miR-518a-5p	Medium									0.433005									-0.424967					-0.301299					-0.540292				-0.338244
MIMAT0002863	miR-518a-3p	Medium									0.473412					0.57602	-0.5567			-0.5283										-0.534971	0.341095			-0.337939
MIMAT0002864	miR-518d-3p	Medium									0.778997														0.999964
MIMAT0002866	miR-517c-3p	Medium														0.562272				-0.529683										-0.549052				-0.34394
MIMAT0002867	miR-520h	High									0.455319					0.655383				-0.522572					-0.393689					-0.580448	0.416656			-0.330543
MIMAT0002868	miR-522-3p	Medium																		-0.329224										-0.543098	0.332221			-0.422466
MIMAT0005452	miR-519a-5p	Low													-0.552912															-0.367881
MIMAT0002869	miR-519a-3p	Medium																												-0.409622	0.348605			-0.325032
MIMAT0002862	miR-527	Medium									0.436676					0.501075				-0.425071					-0.307082					-0.540373				-0.339233
MIMAT0004770	miR-516a-5p	Medium																												-0.34149
MIMAT0002870	miR-499a-5p	High																																	0.317329
MIMAT0004772	miR-499a-3p	Medium						-0.320491									-0.435792																	-0.313109
MIMAT0004773	miR-500a-5p	Medium																														-0.525668
MIMAT0002871	miR-500a-3p	Medium	0.435233										-0.326445																			-0.532294
MIMAT0002872	miR-501-5p	High																														-0.459222
MIMAT0004774	miR-501-3p	Medium	0.391023																													-0.452223
MIMAT0002873	miR-502-5p	Medium											-0.319038																			-0.399111			0.327912
MIMAT0004775	miR-502-3p	Medium	0.332973																													-0.438327
MIMAT0031074	miR-450a-2-3p	Medium							-0.440046
MIMAT0002874	miR-503-5p	Medium																														-0.506741	-0.44402
MIMAT0022925	miR-503-3p	Medium																														-0.434996
MIMAT0002875	miR-504-5p	High																											-0.308725
MIMAT0026612	miR-504-3p	Medium	-0.78883																	-0.361807										-0.484824
MIMAT0002876	miR-505-3p	Medium															-0.435193													-0.396529
MIMAT0002877	miR-513a-5p	High		0.366549					-0.355576					-0.47681			0.807179		-0.492324												-0.381709
MIMAT0004777	miR-513a-3p	Medium																	0.896813					0.334734
MIMAT0002878	miR-506-3p	Very High	-0.580605	0.337849
MIMAT0002879	miR-507	Medium							-0.382967
MIMAT0004778	miR-508-5p	Medium		0.348842
MIMAT0002880	miR-508-3p	Medium		0.313493
MIMAT0004779	miR-509-5p	High		0.320709					-0.567879									-0.587079	0.46468
MIMAT0026613	miR-510-3p	Medium		0.343344				-0.626658																									0.374715	-0.471333
MIMAT0022702	miR-514a-5p	Medium		0.331232
MIMAT0002883	miR-514a-3p	Medium		0.327312
MIMAT0002888	miR-532-5p	Medium	0.456243	0.360892																				0.488062								-0.426771
MIMAT0004780	miR-532-3p	Very High	0.381102																													-0.445754
MIMAT0003150	miR-455-5p	Medium																												-0.463169		-0.579645
MIMAT0004784	miR-455-3p	Medium															-0.388552		0.309698											-0.488893		-0.612626
MIMAT0003163	miR-539-5p	Medium																												-0.411349
MIMAT0022705	miR-539-3p	Low	-0.375212												-0.381275															-0.372242
MIMAT0003164	miR-544a	Medium									0.998465																			-0.458463	-0.873147
MIMAT0004785	miR-545-5p	Medium																						0.370727
MIMAT0003165	miR-545-3p	High												-0.932976			-0.446969												-0.350582	-0.378528			-0.323637
MIMAT0022928	miR-376a-2-5p	Medium													-0.606025	-0.461361							-0.327542
MIMAT0026614	miR-487b-5p	Low								-0.425726				-0.950135											-0.3251							-0.318937
MIMAT0003180	miR-487b-3p	Low															-0.348444													-0.373621
MIMAT0003214	miR-551a	Medium		-0.608548																								-0.307937		-0.440679		-0.517898
MIMAT0026615	miR-552-5p	Medium		0.323791																				-0.386171					-0.339194
MIMAT0003215	miR-552-3p	Medium		0.367235									-0.31523				-0.864126
MIMAT0004792	miR-92b-5p	Medium		-0.344582																						-0.313069
MIMAT0003218	miR-92b-3p	Medium		-0.396819															0.331494
MIMAT0003220	miR-556-5p	Medium																								-0.328687				-0.393553
MIMAT0004793	miR-556-3p	Medium															-0.525679									-0.351685
MIMAT0003223	miR-559	Medium									-0.449299																					0.452197
MIMAT0022706	miR-561-5p	Medium																														-0.349598
MIMAT0003225	miR-561-3p	High											-0.443712								-0.37303
MIMAT0003228	miR-564	Medium																	-0.761753
MIMAT0004794	miR-551b-5p	Medium																								0.67246
MIMAT0003233	miR-551b-3p	Medium															-0.495662									0.413526						-0.503825
MIMAT0022707	miR-570-5p	Medium		-0.778754					-0.484369																			-0.349407		-0.395007
MIMAT0003235	miR-570-3p	Very High																												-0.399903
MIMAT0003237	miR-572	Medium					-0.312276																							-0.625508		0.369224
MIMAT0003238	miR-573	Medium																												-0.420861
MIMAT0004795	miR-574-5p	High							-0.978598
MIMAT0003239	miR-574-3p	Medium																												-0.331121		-0.559824	0.393607
MIMAT0003241	miR-576-5p	Medium																												-0.315637			-0.463784
MIMAT0003242	miR-577	Medium															-0.37204															-0.312276
MIMAT0003243	miR-578	Medium									-0.480653					-0.431054
MIMAT0026616	miR-579-5p	Medium															-0.41721															0.336408	-0.495038
MIMAT0003244	miR-579-3p	Medium																												-0.359404
MIMAT0026617	miR-580-5p	Low																											-0.475897				-0.396955
MIMAT0003245	miR-580-3p	Medium																															-0.538053
MIMAT0003246	miR-581	Medium															-0.337742																		-0.306451
MIMAT0003247	miR-582-5p	Medium	0.314184		-0.427657																		0.35611	-0.450284								-0.583535
MIMAT0004797	miR-582-3p	Medium	0.320593														-0.356231							-0.38426								-0.550639
MIMAT0003249	miR-584-5p	High	0.314636																					0.549483							-0.326961
MIMAT0022708	miR-584-3p	Medium																					0.384453	0.430317								0.509756
MIMAT0026618	miR-585-5p	Low									-0.364981																					-0.385208
MIMAT0003250	miR-585-3p	Medium																														-0.408733
MIMAT0003252	miR-586	Medium					-0.748771
MIMAT0004798	miR-548b-5p	Medium						-0.348678			-0.448973		-0.573574									0.402404						-0.326937							-0.372233
MIMAT0003254	miR-548b-3p	Medium											-0.31187										0.303749
MIMAT0003255	miR-588	Medium											-0.607258					-0.680584			-0.512191
MIMAT0004799	miR-589-5p	Medium															-0.421921							-0.341602									-0.437965
MIMAT0003256	miR-589-3p	Medium																															-0.371758
MIMAT0004800	miR-550a-5p	Medium																															-0.490103
MIMAT0003257	miR-550a-3p	Medium																														0.368175
MIMAT0003258	miR-590-5p	Very High															-0.370368													-0.383273			-0.457758
MIMAT0004801	miR-590-3p	Medium																												-0.32905		0.311615	-0.372126
MIMAT0003260	miR-592	Medium		0.415405	-0.344808								-0.372523						-0.303793													-0.375108
MIMAT0026619	miR-597-3p	Medium														-0.375419														-0.412867
MIMAT0026620	miR-598-5p	Low																					0.554388	-0.398054
MIMAT0003266	miR-598-3p	Medium															-0.426382															-0.39695
MIMAT0003267	miR-599	Medium																				-0.34189								-0.569211	-0.997471
MIMAT0004803	miR-548a-5p	Medium							-0.427695																					-0.658444		0.362482	-0.304882
MIMAT0003270	miR-602	Medium																				-0.644959					0.912393
MIMAT0003273	miR-605-5p	Medium																														-0.506947
MIMAT0026621	miR-605-3p	Medium																				-0.927118												-0.643556
MIMAT0003274	miR-606	Medium																													-0.999996
MIMAT0003277	miR-609	Medium																									-0.973602
MIMAT0003278	miR-610	Medium																	0.892559
MIMAT0003282	miR-614	Medium																								-0.981381
MIMAT0004804	miR-615-5p	High				0.427553			-0.356435		-0.390716																			-0.30935
MIMAT0003283	miR-615-3p	Medium																														-0.357204
MIMAT0003284	miR-616-5p	Medium			0.333254												-0.527279															0.332348	-0.431797
MIMAT0004805	miR-616-3p	Low															-0.384868
MIMAT0003286	miR-617	Medium																0.99995
MIMAT0003287	miR-618	Medium			-0.520327																											-0.442321
MIMAT0003290	miR-621	Medium																																-1
MIMAT0003291	miR-622	Medium																		-0.44529
MIMAT0003293	miR-624-5p	Low															-0.319702						0.301828									0.312539	-0.513344
MIMAT0004807	miR-624-3p	Medium							-0.471835										-0.350728											-0.598551
MIMAT0003294	miR-625-5p	High																														0.548936	-0.454378		-0.307225
MIMAT0004808	miR-625-3p	Low																														0.567452	-0.488806	0.336446
MIMAT0003296	miR-627-5p	Medium																											-0.326313				-0.445705
MIMAT0026623	miR-627-3p	Medium																														0.345994
MIMAT0004809	miR-628-5p	High												0.442567			-0.433929
MIMAT0003297	miR-628-3p	Medium																														0.323077
MIMAT0004810	miR-629-5p	Medium															-0.322167		0.302152											-0.410067		0.576829	-0.487984
MIMAT0003298	miR-629-3p	Medium															-0.548735															0.607075	-0.391563
MIMAT0003299	miR-630	Medium																														0.885561
MIMAT0003301	miR-33b-5p	Medium															-0.451892
MIMAT0004811	miR-33b-3p	Medium																												-0.302501
MIMAT0003302	miR-632	Medium															-0.561065													-0.309497					-0.443881
MIMAT0003306	miR-636	Medium															-0.328143													-0.359037
MIMAT0003308	miR-638	Medium																							-0.670571
MIMAT0003309	miR-639	Medium															-0.418783															0.409758	-0.302637
MIMAT0003311	miR-641	High																												-0.371147
MIMAT0003312	miR-642a-5p	Medium																														0.380338
MIMAT0020924	miR-642a-3p	Medium																-0.36974
MIMAT0003313	miR-643	Medium															-0.488622																-0.407406
MIMAT0003315	miR-645	High													-0.999871
MIMAT0003320	miR-650	High															0.998509			-0.543386
MIMAT0022709	miR-652-5p	Medium																											-0.32062	-0.35619
MIMAT0003322	miR-652-3p	Medium															-0.414601						0.303141
MIMAT0003323	miR-548d-3p	Very High																															-0.499464
MIMAT0003324	miR-661	High																				0.997707
MIMAT0003326	miR-663a	Medium													-0.505027																		-0.396244
MIMAT0003327	miR-449b-5p	Very High		0.771339					-0.731205														-0.897095									-0.372607
MIMAT0009203	miR-449b-3p	Medium																														-0.407495
MIMAT0003328	miR-653-5p	High															-0.324636						0.310733									-0.456473
MIMAT0026625	miR-653-3p	Medium		0.382008																									-0.402904			-0.39617
MIMAT0003329	miR-411-5p	Medium															-0.430197													-0.396388
MIMAT0004813	miR-411-3p	Medium													-0.319847		-0.60627													-0.399958					0.302824
MIMAT0003330	miR-654-5p	High	-0.303578												-0.303932		-0.389833													-0.345455
MIMAT0004814	miR-654-3p	Medium															-0.489493													-0.458181
MIMAT0026626	miR-655-5p	Low																-0.382583		-0.336664											-0.36248
MIMAT0003331	miR-655-3p	Medium																							-0.395894					-0.364164
MIMAT0026627	miR-656-5p	Medium							-0.365298																			-0.321658				-0.300181
MIMAT0003332	miR-656-3p	High													-0.451011																	-0.33323
MIMAT0003333	miR-549a	Medium																											-0.401068	-0.601691	-0.331797
MIMAT0003336	miR-658	Medium																									0.303906						-0.324225
MIMAT0022710	miR-659-5p	Medium																														0.462015
MIMAT0003337	miR-659-3p	Medium													0.711048												0.509876
MIMAT0003338	miR-660-5p	Medium	0.370821	0.389851									-0.314101																			-0.426305			0.312503
MIMAT0022711	miR-660-3p	Medium		0.352131																															0.351999
MIMAT0003339	miR-421	Medium												0.320219																		-0.49967
MIMAT0003340	miR-542-5p	Medium																														-0.589021	-0.395093
MIMAT0003389	miR-542-3p	Medium																														-0.576011	-0.491976
MIMAT0022929	miR-758-5p	Medium																												-0.409141
MIMAT0003879	miR-758-3p	Medium															-0.337986													-0.409392
MIMAT0003880	miR-671-5p	Medium																												-0.364856			-0.325721
MIMAT0004819	miR-671-3p	Medium															-0.416586																-0.37093
MIMAT0026636	miR-668-5p	Medium																														0.412988
MIMAT0003881	miR-668-3p	Medium								-0.327902					-0.569682																	-0.495376
MIMAT0020925	miR-550a-3-5p	Medium																															-0.329915
MIMAT0003882	miR-767-5p	Medium													-0.657203																	0.47026
MIMAT0003883	miR-767-3p	Medium													-0.90342	0.61242											0.421939			-0.420129		0.511601
MIMAT0005458	miR-1224-5p	Medium	0.357858																							0.376248
MIMAT0005459	miR-1224-3p	High																			-0.649296											0.798293
MIMAT0010214	miR-151b	Medium															-0.439932																0.309361
MIMAT0005792	miR-320b	Very High															-0.351257							-0.355191
MIMAT0005793	miR-320c	Very High																						-0.308506									0.368634
MIMAT0005794	miR-1296-5p	Medium			-0.500023									-0.314913			-0.426642													-0.379418
MIMAT0026637	miR-1296-3p	Medium																					0.890469									0.474711
MIMAT0006789	miR-1468-5p	Medium																								0.373481						-0.636064
MIMAT0026638	miR-1468-3p	Medium				0.999936	0.99856
MIMAT0005795	miR-1323	Medium									0.417023					0.544873				-0.490231										-0.455439				-0.303632
MIMAT0005796	miR-1271-5p	Medium															-0.396826															-0.437145	-0.397397
MIMAT0005797	miR-1301-3p	Medium		-0.408733																												-0.575778
MIMAT0003884	miR-454-5p	Medium		-0.315107																												-0.482175	-0.501838
MIMAT0003885	miR-454-3p	Medium											-0.3442															-0.307469				-0.487557	-0.404524
MIMAT0005798	miR-1185-5p	Medium													-0.427022		-0.73194
MIMAT0022713	miR-1185-2-3p	Medium																		-0.35088					-0.394032
MIMAT0010251	miR-449c-5p	High						-0.334071							-0.91186																	-0.445582
MIMAT0005799	miR-1283	Medium									0.427261									-0.323539										-0.575362				-0.418467
MIMAT0003886	miR-769-5p	Medium			-0.350488												-0.376175															-0.381482
MIMAT0003887	miR-769-3p	Medium																														-0.48433
MIMAT0022714	miR-766-5p	Medium																										-0.376622		-0.41459			-0.389584		-0.306983
MIMAT0003888	miR-766-3p	High															-0.399104									0.391665				-0.368519		-0.344965	-0.484686
MIMAT0018926	miR-378d	Medium																														0.378699
MIMAT0005800	miR-1298-5p	Medium											-0.379835												-0.52035
MIMAT0026641	miR-1298-3p	Medium											-0.654585												-0.439247
MIMAT0009206	miR-2113	Medium						-0.712992
MIMAT0003945	miR-765	High																												-0.313192
MIMAT0003948	miR-770-5p	Medium		-0.368043						-0.486164					-0.841774			-0.348163							-0.32192
MIMAT0004284	miR-675-5p	Medium							-0.329163							-0.482016				-0.303484		-0.332343										-0.451188
MIMAT0006790	miR-675-3p	Medium															-0.31009															-0.506755
MIMAT0004902	miR-891a-5p	Medium	-0.749983																					-0.321266
MIMAT0004907	miR-892a	Medium																					0.500184											-0.330801
MIMAT0004909	miR-450b-5p	Medium																							-0.37734							-0.573042	-0.518359
MIMAT0004910	miR-450b-3p	Medium		-0.402287				-0.482161	-0.666588		0.821815																			-0.401083
MIMAT0026718	miR-874-5p	Medium															-0.313119													-0.384986
MIMAT0004911	miR-874-3p	Medium																												-0.392946			-0.302818	-0.328085
MIMAT0004913	miR-891b	Medium											-0.443479																					-0.341612
MIMAT0004916	miR-888-5p	Medium																																-0.366439
MIMAT0004918	miR-892b	Medium					0.702997				0.773363									-0.332986														-0.335284
MIMAT0004919	miR-541-5p	Low												-0.99861	-0.635516										-0.343438
MIMAT0004920	miR-541-3p	Medium		-0.304981											-0.381844															-0.322483		-0.403115
MIMAT0026719	miR-889-5p	Medium			0.951776										-0.883307						-0.561884
MIMAT0004921	miR-889-3p	Medium																												-0.406133
MIMAT0004922	miR-875-5p	Medium																				-0.532618										0.457978
MIMAT0004923	miR-875-3p	High																					-0.996795							-0.877175
MIMAT0004924	miR-876-5p	High																		-0.43439														-0.318747
MIMAT0004925	miR-876-3p	Very High													-0.517778					-0.336721					-0.971339	0.358466								-0.414836
MIMAT0004926	miR-708-5p	Medium			-0.333793															-0.309271										-0.3378		-0.302119
MIMAT0004927	miR-708-3p	Medium																	0.373255											-0.374641
MIMAT0004928	miR-147b	Medium																						-0.538341						-0.437521
MIMAT0004929	miR-190b	Medium			0.49646																														0.381532
MIMAT0004945	miR-744-5p	Medium															-0.328916															-0.610266	-0.323928
MIMAT0004946	miR-744-3p	Medium															-0.572612													-0.374319		-0.530452	-0.301589
MIMAT0004947	miR-885-5p	Medium																															0.376117
MIMAT0004948	miR-885-3p	Medium			0.509094
MIMAT0026720	miR-887-5p	Medium															-0.624619															-0.368817
MIMAT0004951	miR-887-3p	Medium	-0.543574																													-0.622217
MIMAT0004952	miR-665	High												-0.95707	-0.645426
MIMAT0004953	miR-873-5p	Medium													-0.548649																			-0.355987
MIMAT0022717	miR-873-3p	Medium							-0.642279											-0.399268										-0.319806				-0.345265
MIMAT0004954	miR-543	Medium																												-0.414601
MIMAT0004956	miR-374b-3p	Medium																							-0.303889							0.41524	-0.362247
MIMAT0004957	miR-760	High												0.311444			-0.424636
MIMAT0004958	miR-301b-3p	Medium																												-0.328653		-0.556333	-0.452166	-0.304266
MIMAT0004959	miR-216b-5p	High		0.462783																												-0.39987
MIMAT0004960	miR-208b-3p	High																				0.72939
MIMAT0004975	miR-509-3-5p	High																													-0.302842
MIMAT0004976	miR-933	Medium																	-0.457103											-0.711992		0.387171
MIMAT0004977	miR-934	Medium				-0.302692										-0.458487								0.999949								-0.343532
MIMAT0004979	miR-936	Medium				0.69952
MIMAT0022938	miR-937-5p	Medium																											-0.635205
MIMAT0004980	miR-937-3p	Medium															-0.343995		0.300131
MIMAT0004981	miR-938	Medium						-0.535262											0.951212
MIMAT0004982	miR-939-5p	High															-0.413318													-0.313466			-0.304055
MIMAT0022939	miR-939-3p	Medium				0.36189																										0.692246
MIMAT0004983	miR-940	High																														-0.553747	-0.416994
MIMAT0004985	miR-942-5p	High															-0.574895															0.579334	-0.500839	0.322322
MIMAT0026734	miR-942-3p	Low															-0.382229															0.528739	-0.55825
MIMAT0004986	miR-943	Medium							-0.346416																			-0.451254
MIMAT0004987	miR-944	Medium																														-0.304134
MIMAT0005823	miR-1178-3p	Medium																												-0.999275
MIMAT0005824	miR-1179	Medium											-0.327943		-0.342016		-0.548852															-0.452749
MIMAT0026735	miR-1180-5p	Low																														0.478628
MIMAT0005825	miR-1180-3p	Medium															-0.3146																	-0.400456
MIMAT0005826	miR-1181	Medium													-0.380018
MIMAT0005827	miR-1182	High																		0.952949
MIMAT0005573	miR-1225-3p	Medium									-0.61263			0.985273							0.336521									-0.553177
MIMAT0005577	miR-1226-3p	Medium															-0.309183													-0.316739		-0.500474
MIMAT0005589	miR-1234-3p	Medium						-0.407384																								0.30138
MIMAT0022945	miR-1236-5p	Medium															-0.999994
MIMAT0005591	miR-1236-3p	Very High																															0.862396
MIMAT0022946	miR-1237-5p	Medium																				0.408444
MIMAT0005592	miR-1237-3p	High																												-0.369857
MIMAT0005593	miR-1238-3p	Medium																	-0.339876							0.701534
MIMAT0026736	miR-548e-5p	Medium		-0.843574																				-0.520024						-0.463819		0.35548
MIMAT0005874	miR-548e-3p	High																												-0.304468			-0.450372
MIMAT0005876	miR-1285-3p	High																						-0.480708						-0.315425		0.304739	-0.378653	-0.341134
MIMAT0005877	miR-1286	Medium																		-0.360666														0.460743
MIMAT0005879	miR-1289	Medium																-0.956479									0.796881
MIMAT0005880	miR-1290	High																										-0.651614
MIMAT0005881	miR-1291	Very High															-0.540442
MIMAT0005882	miR-548k	Medium																												-0.335536			-0.347025
MIMAT0005883	miR-1293	Medium																						0.462961
MIMAT0005884	miR-1294	Medium																									0.378328
MIMAT0005885	miR-1295a	High																					0.340493							-0.413481		-0.328259
MIMAT0005889	miR-548l	Medium							-0.325397																					-0.344404
MIMAT0005891	miR-1303	High				0.836295
MIMAT0005892	miR-1304-5p	Medium																												-0.353342
MIMAT0005893	miR-1305	High																-0.750277												-0.364401		-0.479327
MIMAT0005894	miR-1243	Medium		0.378879																								-0.335607
MIMAT0005895	miR-548f-3p	High																		-0.323657			-0.380588									0.373437
MIMAT0005897	miR-1245a	Medium																									0.699477
MIMAT0005898	miR-1246	Medium														-0.998348				-0.361771
MIMAT0005899	miR-1247-5p	Medium																														-0.606395		0.320206
MIMAT0022721	miR-1247-3p	Medium																														-0.553861		0.367495
MIMAT0005900	miR-1248	Medium													-0.33491
MIMAT0005901	miR-1249-3p	Medium	0.368796																					-0.504757
MIMAT0005902	miR-1250-5p	Medium																								0.300952						-0.388095
MIMAT0026740	miR-1250-3p	Medium				0.980112
MIMAT0005903	miR-1251-5p	High																			-0.421342											-0.534117		-0.341048
MIMAT0026741	miR-1251-3p	Low																						-0.977215		-0.423209						-0.370402		-0.340102
MIMAT0005904	miR-1253	High																														0.624136
MIMAT0005905	miR-1254	High									-0.307066																			-0.36046
MIMAT0005906	miR-1255a	Medium																												-0.353316
MIMAT0005907	miR-1256	Medium									-0.505955																		0.570725	-0.456945	0.413218	0.553214
MIMAT0005909	miR-1258	Medium																									0.452923							0.325989
MIMAT0005911	miR-1260a	High																	0.317555					-0.565333				-0.619423		-0.929998
MIMAT0005914	miR-1262	Medium																	0.348549					-0.411279								-0.559337
MIMAT0005915	miR-1263	Medium																														-0.388499
MIMAT0005916	miR-548n	Medium									-0.429668												0.441203						0.510053	-0.356905
MIMAT0005918	miR-1265	Medium					-0.495434
MIMAT0005919	miR-548o-3p	Medium																															-0.494258		-0.471143
MIMAT0026742	miR-1266-3p	Medium																												-0.921052
MIMAT0005921	miR-1267	High																										-0.70968
MIMAT0005923	miR-1269a	Medium	-0.585619																													-0.376624
MIMAT0005930	miR-1276	Medium																														-0.320887
MIMAT0005933	miR-1277-3p	Medium			0.345151																									-0.393372			-0.301421
MIMAT0005936	miR-1278	Medium														-0.382565														-0.46798
MIMAT0005939	miR-1281	Medium					0.815848																								0.999852
MIMAT0005941	miR-1284	Medium													-0.410963															-0.367721			-0.39949
MIMAT0026743	miR-1288-5p	Medium																												-0.305289			-0.413864
MIMAT0005942	miR-1288-3p	Medium															-0.347222															-0.400935	-0.373629
MIMAT0005943	miR-1292-5p	Medium																																	-0.343212
MIMAT0022948	miR-1292-3p	Medium																												-0.509774		0.466531
MIMAT0005944	miR-1252-5p	Medium																											0.992093
MIMAT0005948	miR-664a-5p	Medium		0.308308																												-0.389727	0.372745
MIMAT0005949	miR-664a-3p	Medium																															0.485663
MIMAT0022726	miR-1306-5p	Medium															-0.493733
MIMAT0005950	miR-1306-3p	Medium																															-0.361478
MIMAT0022727	miR-1307-5p	Low															-0.488491													-0.398292			-0.334613
MIMAT0005951	miR-1307-3p	High																												-0.400174		-0.462365	-0.315956
MIMAT0005788	miR-513b-5p	Medium																													-0.346256
MIMAT0026749	miR-513b-3p	Low																					0.758025
MIMAT0005789	miR-513c-5p	High							-0.366897
MIMAT0022728	miR-513c-3p	Medium																		-0.509899
MIMAT0005955	miR-1197	Medium	-0.693221															-0.349255		-0.424717									-0.54689						0.500124
MIMAT0026765	miR-1537-5p	Low																															-0.436318
MIMAT0007399	miR-1537-3p	Medium																	0.316672											-0.397816		0.360734
MIMAT0007400	miR-1538	Medium																														0.322065	-0.341411
MIMAT0006764	miR-320d	Very High		-0.355481
MIMAT0007881	miR-1908-5p	Medium																												-0.820795	-0.646468
MIMAT0026916	miR-1908-3p	Medium																		-0.415104										-0.412089
MIMAT0007882	miR-1909-5p	Medium				0.496414
MIMAT0007883	miR-1909-3p	Medium				0.972285
MIMAT0007884	miR-1910-5p	Medium																												-0.440128
MIMAT0026917	miR-1910-3p	Medium																												-0.643609
MIMAT0007886	miR-1911-3p	Medium																		-0.853752					-0.682422
MIMAT0007887	miR-1912	High											-0.598248												-0.457553
MIMAT0007888	miR-1913	Medium					0.310177																0.870472					-0.369307
MIMAT0007889	miR-1914-5p	Medium																											-0.500268
MIMAT0007890	miR-1914-3p	Medium																		-0.442884				-0.710537								0.539109		-0.687804
MIMAT0007891	miR-1915-5p	Medium															-0.998189									-0.738924	0.41407
MIMAT0009451	miR-1976	Medium															-0.31458		0.324259													0.30232
MIMAT0010133	miR-2110	High																												-0.304799
MIMAT0011157	miR-2114-3p	Medium																															0.313182
MIMAT0011158	miR-2115-5p	Medium			-0.869941																			-0.718222						-0.518007
MIMAT0011159	miR-2115-3p	Medium		-0.601482	-0.546903																		0.596527	-0.497945			0.354621
MIMAT0011160	miR-2116-5p	Medium																							0.430315
MIMAT0011161	miR-2116-3p	Medium															-0.517017
MIMAT0026921	miR-2276-5p	Medium											-0.452459														0.611744
MIMAT0011775	miR-2276-3p	Medium						-0.311116																			0.457131		-0.311694	-0.50284
MIMAT0017352	miR-2277-5p	Low																						0.303336
MIMAT0011777	miR-2277-3p	Medium			0.43982												-0.463363
MIMAT0011778	miR-2278	Medium																												-0.447841		0.310763
MIMAT0013515	miR-2681-5p	Medium							0.82947												-0.387316														-0.998395
MIMAT0013516	miR-2681-3p	Medium								0.96449			-0.537152
MIMAT0013517	miR-2682-5p	Medium																								-0.604868				-0.366934
MIMAT0013518	miR-2682-3p	Medium								-0.621822																-0.515908
MIMAT0012735	miR-718	Medium																						0.961341
MIMAT0013802	miR-2861	Medium																			0.999945
MIMAT0014977	miR-3115	Low													0.628222			0.372341	-0.326233							-0.767633				-0.736718
MIMAT0014978	miR-3116	Medium														0.391757							0.92444									0.348804
MIMAT0019197	miR-3117-5p	Medium																	0.336685	-0.736727											-0.981811
MIMAT0014979	miR-3117-3p	Medium																														-0.367602
MIMAT0014981	miR-3119	Medium																	-0.99866
MIMAT0019198	miR-3120-5p	Medium				-0.92946
MIMAT0014982	miR-3120-3p	Medium					0.654432		-0.999873
MIMAT0019199	miR-3121-5p	Medium																											-0.932566
MIMAT0014983	miR-3121-3p	Medium						0.50301											0.4955					-0.763759		-0.820657
MIMAT0014984	miR-3122	Medium																				0.776512
MIMAT0014986	miR-3124-5p	Low											-0.419272																-0.838123	-0.552009		0.40337
MIMAT0014987	miR-548s	Medium															-0.349204												-0.300942			0.514472	-0.368685
MIMAT0014988	miR-3125	High											-0.347429							-0.392247										-0.328239	-0.41186	-0.402324			-0.59872
MIMAT0014989	miR-3126-5p	Medium									-0.605399
MIMAT0015377	miR-3126-3p	Medium									-0.321418																	-0.394956		-0.524778		-0.369196	-0.498039
MIMAT0014990	miR-3127-5p	Medium															-0.378103
MIMAT0019201	miR-3127-3p	Medium															-0.513268													-0.360985
MIMAT0014991	miR-3128	Medium																	0.464209	-0.376634
MIMAT0014992	miR-3129-5p	Medium																												-0.443584
MIMAT0019202	miR-3129-3p	Medium			0.467611										-0.417551															-0.373284
MIMAT0014995	miR-3130-5p	Medium															-0.487079															0.51895
MIMAT0014994	miR-3130-3p	Medium																												-0.312431
MIMAT0014996	miR-3131	Medium																												-0.408591		-0.398219	-0.525097
MIMAT0014997	miR-3132	Medium							0.997095																					-0.448124
MIMAT0014998	miR-3133	Medium								-0.847765																									0.963505
MIMAT0014999	miR-378b	Medium		0.896664													-0.621348													-0.419531	-0.358105
MIMAT0015001	miR-3135a	High													-0.914491			0.487634
MIMAT0015002	miR-466	Medium	0.334067	0.449221							-0.58038																			-0.496539
MIMAT0015003	miR-3136-5p	Medium															-0.531132													-0.365087			-0.462318
MIMAT0019203	miR-3136-3p	Medium																								-0.997371
MIMAT0015004	miR-544b	High																												-0.812414
MIMAT0015005	miR-3137	Medium																	0.40623									-0.849072						0.317483
MIMAT0015006	miR-3138	Medium															-0.766508													-0.487146
MIMAT0015007	miR-3139	Medium																												-0.670254				-0.385943
MIMAT0015008	miR-3140-3p	High																												-0.339972		0.339447
MIMAT0015009	miR-548t-5p	Medium															-0.542495																-0.517174
MIMAT0015010	miR-3141	Medium											-0.894699					0.96234		-0.997798
MIMAT0015012	miR-3143	Medium															-0.503986												-0.413363	-0.533647
MIMAT0015014	miR-3144-5p	Medium					0.718803
MIMAT0015015	miR-3144-3p	Medium																			-0.303663										-0.318313
MIMAT0019205	miR-3145-5p	Medium	0.780101						-0.451043						-0.458197								0.447058
MIMAT0015016	miR-3145-3p	Medium						-0.336139								0.471051
MIMAT0015017	miR-1273c	Medium																	0.611286	0.826035											-0.729171	0.923123	-0.709344
MIMAT0015018	miR-3146	Medium															-0.73683	0.305997	0.405587													0.344885
MIMAT0015020	miR-548v	Medium															-0.397269
MIMAT0015021	miR-3148	Medium																									-0.666017
MIMAT0015022	miR-3149	Medium																												-0.467281
MIMAT0019206	miR-3150a-5p	Medium																												-0.478315		0.327054
MIMAT0015023	miR-3150a-3p	High															-0.547088
MIMAT0015024	miR-3151-5p	Medium																												-0.398693	-0.882941
MIMAT0019207	miR-3152-5p	High													-0.465586						-0.368377									-0.340043
MIMAT0015025	miR-3152-3p	Medium																																-0.707175
MIMAT0019208	miR-3074-5p	Medium	0.303817												0.317457		-0.331837									0.407469						-0.629872
MIMAT0015027	miR-3074-3p	Medium							-0.306209
MIMAT0015028	miR-3154	Medium									-0.457852																	-0.382369				-0.430252
MIMAT0015030	miR-3156-5p	Low											0.830101
MIMAT0015031	miR-3157-5p	Medium															-0.40523													-0.325886
MIMAT0019210	miR-3157-3p	Medium												-0.407319																-0.392205
MIMAT0019211	miR-3158-5p	Medium		-0.437634																				-0.461528
MIMAT0019212	miR-3160-5p	Medium																													0.717107
MIMAT0015034	miR-3160-3p	Medium																																	-0.998125
MIMAT0015035	miR-3161	Medium																									0.355004			-0.393888
MIMAT0015036	miR-3162-5p	Medium																														0.746275
MIMAT0019213	miR-3162-3p	Medium																										-0.999879
MIMAT0015037	miR-3163	Medium																											0.68275
MIMAT0015039	miR-3165	Medium																							0.954938							0.760595
MIMAT0015040	miR-3166	Medium																															-0.582306
MIMAT0015041	miR-1260b	High																										-0.355291
MIMAT0015045	miR-3170	Medium							-0.366558															-0.480234											-0.324834
MIMAT0015046	miR-3171	Medium								0.63655																					0.47681
MIMAT0019214	miR-3173-5p	Medium			0.37337												-0.361523																-0.368034
MIMAT0015048	miR-3173-3p	Medium								0.38076																						0.440494
MIMAT0015049	miR-1193	Medium																										-0.619403			-0.566066
MIMAT0001630	miR-323b-5p	Medium																		-0.436879						-0.36732						-0.319608
MIMAT0015050	miR-323b-3p	Medium															-0.36179													-0.368415		-0.411667
MIMAT0015051	miR-3174	Medium																														0.348465
MIMAT0015052	miR-3175	Medium																		-0.351532													-0.481869
MIMAT0015053	miR-3176	Medium																						-0.457824
MIMAT0019215	miR-3177-5p	Medium														-0.99752														-0.973098	-0.630567
MIMAT0015054	miR-3177-3p	Medium																												-0.374047
MIMAT0015055	miR-3178	Medium																		0.337261									-0.769184
MIMAT0015056	miR-3179	Medium																					0.965564								0.600197
MIMAT0015060	miR-548w	Medium																															0.87726
MIMAT0015061	miR-3181	Medium																								0.889499
MIMAT0015063	miR-3183	Medium																												-0.362353
MIMAT0015065	miR-3185	Medium						-0.971977
MIMAT0015066	miR-3065-5p	Medium		-0.303826																										-0.394		-0.381184
MIMAT0015378	miR-3065-3p	Medium		-0.316086															0.309859	0.344077										-0.367013
MIMAT0015067	miR-3186-5p	Medium																															-0.611235	-0.404713
MIMAT0019216	miR-3187-5p	High																						-0.316893					-0.36731	-0.322883
MIMAT0015069	miR-3187-3p	Medium																														-0.378907
MIMAT0015070	miR-3188	High									-0.530525																			-0.484313
MIMAT0015071	miR-3189-3p	Medium																	0.76059											-0.330125
MIMAT0015072	miR-320e	High		-0.602822							-0.361221
MIMAT0015073	miR-3190-5p	Medium																														0.533895			-0.731865
MIMAT0022839	miR-3190-3p	#N/A			0.973299																							-0.703809					0.615788
MIMAT0022732	miR-3191-5p	Medium																					0.465933					-0.62038		-0.381497
MIMAT0015075	miR-3191-3p	Medium																														0.310565
MIMAT0015076	miR-3192-5p	Medium							-0.408967															-0.339471						-0.363607
MIMAT0027027	miR-3192-3p	Medium																												-0.83676
MIMAT0015077	miR-3193	Medium																	0.312164
MIMAT0019218	miR-3194-3p	Medium															-0.334352							-0.837403											-0.698834
MIMAT0015079	miR-3195	Medium									-0.741933												0.999414
MIMAT0015080	miR-3196	Medium							-0.34295										-0.932949							-0.571734
MIMAT0015081	miR-548x-3p	High											-0.344352
MIMAT0015083	miR-3198	Medium															-0.498853													-0.386888
MIMAT0015084	miR-3199	Medium																														0.430235
MIMAT0017392	miR-3200-5p	Medium														-0.364712		0.349687										-0.566055	-0.493677
MIMAT0015085	miR-3200-3p	Medium																														-0.570013
MIMAT0015087	miR-514b-5p	High	-0.994823						-0.358185																	-0.486679
MIMAT0015088	miR-514b-3p	Medium		0.331301
MIMAT0015089	miR-3202	Medium									-0.715992									0.358137										-0.448446
MIMAT0016847	miR-378c	High		0.31089																												0.603882	-0.345486		0.326779
MIMAT0016858	miR-4306	Medium																	0.315055
MIMAT0016866	miR-4315	Medium																													0.998067
MIMAT0016873	miR-4322	Medium																	-0.651334
MIMAT0016884	miR-4254	Medium																												-0.415496
MIMAT0016895	miR-2355-5p	Medium																															-0.459066
MIMAT0017950	miR-2355-3p	Medium																															-0.491905
MIMAT0016915	miR-4284	High				0.491989																										-0.909636
MIMAT0016925	miR-500b-5p	Medium																														-0.52588
MIMAT0027032	miR-500b-3p	Medium	0.386929
MIMAT0017981	miR-3605-5p	Medium	0.363718								-0.371815																	-0.300408
MIMAT0017982	miR-3605-3p	High																														-0.4888
MIMAT0017983	miR-3606-5p	Medium									-0.773913											0.722789								-0.434549
MIMAT0017984	miR-3607-5p	Medium																												-0.324429
MIMAT0017985	miR-3607-3p	Low															-0.530264															0.454894
MIMAT0017986	miR-3609	Medium																												-0.370683
MIMAT0017987	miR-3610	Low															-0.514808																-0.359982
MIMAT0017989	miR-3612	Medium																									0.487246
MIMAT0017990	miR-3613-5p	Medium																												-0.415755			-0.579293
MIMAT0017991	miR-3613-3p	High																											-0.358251	-0.319394			-0.517424
MIMAT0017992	miR-3614-5p	Medium																														0.411091
MIMAT0017993	miR-3614-3p	Medium															0.391212															0.414002
MIMAT0017994	miR-3615	Medium															-0.321637																-0.477642
MIMAT0017995	miR-3616-5p	Medium																												-0.553516
MIMAT0017996	miR-3616-3p	Medium																						-0.999999						-0.436637		0.478361
MIMAT0017997	miR-3617-5p	Medium																										-0.437778
MIMAT0022966	miR-3617-3p	Medium																				-0.365087							-0.41767			0.34698
MIMAT0017998	miR-3618	Low																	-0.671475													0.605083
MIMAT0017999	miR-3619-5p	High																												-0.37297
MIMAT0019219	miR-3619-3p	Medium																																	-0.409586
MIMAT0022967	miR-3620-5p	Medium																												-0.427454					0.475825
MIMAT0018001	miR-3620-3p	Medium																										-0.352881				-0.336098
MIMAT0018003	miR-3622a-5p	Medium				0.458599		-0.409265																								0.656989
MIMAT0018004	miR-3622a-3p	Medium		-0.660093
MIMAT0018006	miR-3622b-3p	High		-0.864507
MIMAT0018065	miR-3646	Medium									0.453735
MIMAT0018068	miR-3648	Medium															-0.34401																-0.394841
MIMAT0018070	miR-3650	Medium																										-0.3077				0.544765
MIMAT0018071	miR-3651	Medium																			-0.316552
MIMAT0018072	miR-3652	High				0.34682											-0.442818
MIMAT0018073	miR-3653-3p	Medium															-0.459115							-0.319171
MIMAT0018074	miR-3654	Medium																								-0.470615
MIMAT0018075	miR-3655	Medium																					-0.559493									0.332164	-0.305701
MIMAT0018076	miR-3656	Medium												-0.947447
MIMAT0018080	miR-3659	Medium																										-0.885209		-0.498607
MIMAT0018081	miR-3660	Medium																											-0.492312	-0.527538	0.385234
MIMAT0018082	miR-3661	Medium				0.398264																								-0.518557				-0.445853
MIMAT0018083	miR-3662	Medium		-0.321224																										-0.425662		0.351949	-0.313139		-0.367068
MIMAT0018085	miR-3663-3p	Medium									-0.771963							0.686461
MIMAT0019220	miR-3664-3p	Medium							-0.347464
MIMAT0018089	miR-3667-5p	Medium									0.302253						-0.444917																-0.383904
MIMAT0018090	miR-3667-3p	Medium															-0.469039												-0.621977
MIMAT0018098	miR-3675-5p	Medium																												-0.938521
MIMAT0018099	miR-3675-3p	Medium																														0.505392
MIMAT0019221	miR-3677-5p	Medium															-0.496354		0.344263													-0.310816	-0.345559
MIMAT0018101	miR-3677-3p	Medium															-0.431176															-0.400046	-0.34162
MIMAT0018102	miR-3678-5p	Low			0.592048																											0.465779
MIMAT0018103	miR-3678-3p	High																										-0.413854
MIMAT0018105	miR-3679-3p	Medium																												-0.448837
MIMAT0018106	miR-3680-5p	Medium			-0.840812																			-0.435361						-0.532414				0.301164	-0.518448
MIMAT0018107	miR-3680-3p	Medium												-0.327142			-0.399065													-0.389245
MIMAT0018108	miR-3681-5p	Medium		-0.550731							-0.616615									-0.312705										-0.340739
MIMAT0018110	miR-3682-3p	Low																	0.308896														-0.462563
MIMAT0018111	miR-3683	Medium														-0.998915
MIMAT0018112	miR-3684	Medium															-0.360379						0.430183						-0.31827	-0.365174		0.416461	-0.389471
MIMAT0018113	miR-3685	Medium																																-0.52375
MIMAT0018114	miR-3686	Medium																-0.999828
MIMAT0018115	miR-3687	Medium																															-0.429356
MIMAT0019223	miR-3688-5p	Medium																	0.903886
MIMAT0018116	miR-3688-3p	Medium							-0.307519								-0.509775													-0.454456		0.374048
MIMAT0018117	miR-3689a-5p	Low																															-0.956986
MIMAT0018119	miR-3690	Medium																									0.347309
MIMAT0018122	miR-3692-3p	Medium	0.583509					-0.54509									-0.837485										-0.569076
MIMAT0018183	miR-3909	Medium															-0.449814													-0.399303
MIMAT0018184	miR-3910	Medium								0.30254					-0.54128
MIMAT0018185	miR-3911	Medium																												-0.325931
MIMAT0027036	miR-3912-5p	Low							-0.306392		-0.37674
MIMAT0018187	miR-3913-5p	Medium	-0.316496		-0.443297												-0.512369							-0.403021
MIMAT0019225	miR-3913-3p	Medium									-0.338524													-0.389286											-0.422194
MIMAT0018188	miR-3914	Medium																									-0.88362			-0.480763		0.571136
MIMAT0018190	miR-3916	High														-0.575427														-0.918225
MIMAT0018191	miR-3917	Medium															-0.481809																-0.453752
MIMAT0018192	miR-3918	Medium														-0.405525
MIMAT0018193	miR-3919	Medium				-0.343526																						-0.38813
MIMAT0019226	miR-3150b-5p	Medium																						-0.867184								0.932251
MIMAT0018194	miR-3150b-3p	Medium															-0.49641																	0.373299
MIMAT0018195	miR-3920	Medium																	0.331244										0.349594
MIMAT0018196	miR-3921	Medium																										-0.504134		-0.613954		0.742163		0.998587
MIMAT0019227	miR-3922-5p	Medium																												-0.558651			-0.342579
MIMAT0018197	miR-3922-3p	Medium																												-0.331442			-0.56017
MIMAT0018198	miR-3923	Medium		-0.386934
MIMAT0018200	miR-3925-5p	High				0.341307													-0.528411
MIMAT0019228	miR-3925-3p	Medium						-0.417959																			0.950102				-0.591082
MIMAT0018202	miR-3927-3p	Medium																															0.311993
MIMAT0018203	miR-676-5p	Medium		0.32515
MIMAT0018204	miR-676-3p	Low																						-0.370447								-0.392499
MIMAT0027037	miR-3928-5p	Medium						-0.460443																								0.502452
MIMAT0022975	miR-3934-3p	Medium												0.413167			-0.314131
MIMAT0018350	miR-3935	Low					-0.81407
MIMAT0018351	miR-3936	Medium																														0.784725
MIMAT0018352	miR-3937	Medium							-0.318115																			-0.868811		-0.483301
MIMAT0018353	miR-3938	Medium								0.374888												-0.431046
MIMAT0018354	miR-548y	Medium						-0.475328							-0.482156																0.36216
MIMAT0018355	miR-3939	Low														0.389544												-0.407179		-0.48599
MIMAT0019229	miR-3940-5p	Medium															-0.467995															0.478062	-0.44507
MIMAT0018356	miR-3940-3p	Medium															-0.480801															0.516771
MIMAT0018357	miR-3941	Medium																														0.978209
MIMAT0018358	miR-3942-5p	High																					0.32827							-0.30931		0.517946	-0.321718
MIMAT0019230	miR-3942-3p	Medium																		-0.376406										-0.58677			-0.41504
MIMAT0018359	miR-3943	Medium																									-0.664109						-0.58126
MIMAT0019231	miR-3944-5p	Medium																		-0.511047				-0.664066
MIMAT0018360	miR-3944-3p	Medium																														0.354901
MIMAT0018443	miR-374c-5p	Medium																						-0.995396			0.526821			-0.78714		0.403269
MIMAT0022736	miR-642b-5p	Medium						-0.375822								-0.376709	-0.968902															0.489956
MIMAT0022737	miR-550b-2-5p	Medium				0.358532										-0.512141
MIMAT0018445	miR-550b-3p	Medium							-0.501795							-0.6881
MIMAT0018925	miR-1268b	Medium															-0.46876											-0.374113
MIMAT0018928	miR-548ab	Medium																		0.56991		0.76118								-0.490733		-0.314446
MIMAT0018934	miR-4421	Medium																												-0.485137					-0.920151
MIMAT0018935	miR-4422	Medium																															-0.310561
MIMAT0019232	miR-4423-5p	Medium			-0.533766												-0.522828						-0.402375			0.320605		-0.309354
MIMAT0018936	miR-4423-3p	Medium																										-0.309031	0.975838
MIMAT0018937	miR-378g	Medium		-0.714075													-0.784281											-0.464771		-0.481598
MIMAT0018940	miR-4425	Medium																														0.552569
MIMAT0018941	miR-4426	Medium																						-0.772383		0.947928
MIMAT0018944	miR-4429	High																-0.793693															0.999885
MIMAT0018947	miR-4431	Medium														0.459746							0.878877
MIMAT0020956	miR-4433a-5p	Medium																														0.458827
MIMAT0018949	miR-4433a-3p	Medium						0.417903																		-0.819525					-0.434068	0.350192
MIMAT0018950	miR-4434	Medium															-0.471435																		-0.972086
MIMAT0018951	miR-4435	Medium																					-0.444117			-0.409331		-0.845326
MIMAT0018953	miR-4437	Medium					-0.8956																								-0.763728
MIMAT0018960	miR-4442	Medium															-0.413823																-0.413946
MIMAT0018961	miR-4443	Medium			0.529153																												-0.397727
MIMAT0018962	miR-4444	Medium																														0.316428	-0.326273
MIMAT0018963	miR-4445-5p	Medium					0.686381											0.421143															0.623517
MIMAT0018964	miR-4445-3p	Low																												0.997555
MIMAT0019233	miR-4446-5p	Medium							-0.371761
MIMAT0018965	miR-4446-3p	Medium														-0.478888		-0.484202												-0.632697
MIMAT0018967	miR-4448	Low																0.80907
MIMAT0018969	miR-548ag	Medium																										-0.575273					-0.305737
MIMAT0018971	miR-4450	Medium					0.78865
MIMAT0018972	miR-548ah-5p	Medium																																-0.344273
MIMAT0018976	miR-4454	Low																												-0.398479
MIMAT0018979	miR-4457	Medium					0.314702
MIMAT0018981	miR-4459	Medium																						-0.999359
MIMAT0018983	miR-4461	Medium																								-0.465002				-0.340339
MIMAT0018988	miR-4464	Medium																			0.892597
MIMAT0018989	miR-548ai	Medium																										-0.345065		-0.380223
MIMAT0018993	miR-4466	Medium			-0.548397												-0.465732													-0.486348
MIMAT0018994	miR-4467	Medium																													0.682702
MIMAT0018996	miR-4469	Medium		-0.390426							-0.387279																			-0.371137
MIMAT0018997	miR-4470	Medium									-0.678131					-0.417027
MIMAT0019000	miR-4473	Medium		-0.350633																												-0.3178	-0.456926
MIMAT0019001	miR-4474-3p	Medium																												-0.691088
MIMAT0019003	miR-4476	Medium															-0.338486														-0.517595	0.383741
MIMAT0019004	miR-4477a	Medium																	0.999674
MIMAT0019005	miR-4477b	Medium																										-0.801849				0.557663
MIMAT0019006	miR-4478	Medium							-0.320654										-0.465769
MIMAT0019010	miR-3689f	Low																	-0.998417												-0.458008
MIMAT0019011	miR-4479	Medium									-0.393633				-0.364753									-0.511733								0.491459
MIMAT0020958	miR-4482-3p	Medium									-0.551034						-0.68494
MIMAT0019018	miR-4484	Medium															-0.627744										0.310921
MIMAT0019021	miR-4487	Medium															-0.521619		0.396811										0.966589			0.431855
MIMAT0019022	miR-4488	Medium					0.459863																			-0.583152			-0.831397
MIMAT0019023	miR-4489	Medium						0.430049
MIMAT0019025	miR-4490	Medium																		-0.632411
MIMAT0019026	miR-4491	Medium				0.30062											-0.467395										0.609287							0.476366
MIMAT0019027	miR-4492	Medium													-0.546525
MIMAT0019029	miR-4494	Medium							-0.590669																							0.508398
MIMAT0019031	miR-4496	Medium					0.466156				0.912418
MIMAT0019032	miR-4497	Medium																										-0.30515
MIMAT0019033	miR-4498	Medium														0.68187																0.481882
MIMAT0019034	miR-4419b	Medium	0.9989			0.390035																								-0.578014
MIMAT0019037	miR-4501	Medium									-0.518081											-0.412359			0.428809	0.311283						-0.411565
MIMAT0019038	miR-4502	Medium																			-0.409308
MIMAT0019039	miR-4503	Medium																												-0.753862
MIMAT0019040	miR-4504	Medium						-0.48735																							-0.812087
MIMAT0019041	miR-4505	Medium															-0.436954														-0.422892	0.461669
MIMAT0019042	miR-4506	Medium															-0.849266
MIMAT0019047	miR-4510	Medium																						-0.368888								-0.365992
MIMAT0019048	miR-4511	Medium							-0.399384																		0.346581					0.380621
MIMAT0019049	miR-4512	Medium												-0.624288
MIMAT0019052	miR-4515	Medium												-0.761676																-0.395924			-0.403483
MIMAT0019053	miR-4516	Medium																								-0.480355
MIMAT0019054	miR-4517	Medium																										-0.314682		-0.56522		0.422345		0.484785
MIMAT0019055	miR-4518	Medium						-0.562843
MIMAT0019056	miR-4519	Medium																												-0.656783		0.351954
MIMAT0019235	miR-4520-5p	Medium														-0.843118
MIMAT0019059	miR-1269b	Medium																														-0.408431
MIMAT0019060	miR-4522	Medium									-0.389845						-0.49911							-0.36328			0.418461			-0.473885
MIMAT0019061	miR-4523	Medium																												-0.516043		0.402136
MIMAT0019062	miR-4524a-5p	Medium								-0.676866																						0.642306
MIMAT0019063	miR-4524a-3p	Medium																						-0.456519			0.344476
MIMAT0019064	miR-4525	Medium																												-0.906571
MIMAT0019065	miR-4526	High																													-0.562219
MIMAT0019066	miR-4527	Medium				0.99888														-0.514071
MIMAT0019067	miR-4528	Medium									0.67204																	-0.727943
MIMAT0019236	miR-4529-5p	Medium					-0.631937
MIMAT0019068	miR-4529-3p	Medium																0.303857							-0.556508
MIMAT0019069	miR-4530	Medium																				0.531324									0.999734
MIMAT0019071	miR-4532	Medium	0.947131
MIMAT0019072	miR-4533	Medium																										-0.422791		-0.38341
MIMAT0019074	miR-378i	Medium																								-0.589499				-0.325518
MIMAT0019078	miR-4536-5p	Medium							-0.489139								-0.688676													-0.360864		0.570243
MIMAT0019688	miR-4632-3p	Low																					0.311727
MIMAT0019690	miR-4633-3p	Medium				0.483471
MIMAT0019693	miR-4636	Low																						-0.416188								-0.445201
MIMAT0019694	miR-4637	Medium																												-0.566402
MIMAT0019695	miR-4638-5p	Medium						-0.403643																								0.501988
MIMAT0019697	miR-4639-5p	Medium														0.913406
MIMAT0019698	miR-4639-3p	Medium							0.471937
MIMAT0019700	miR-4640-3p	Low															-0.751685													-0.368448
MIMAT0019701	miR-4641	Medium									-0.807265
MIMAT0019703	miR-4643	Medium		-0.516594																	-0.504884
MIMAT0019704	miR-4644	Medium																													-0.880811		0.881677
MIMAT0019705	miR-4645-5p	Medium																												-0.995059		0.964062
MIMAT0019706	miR-4645-3p	Medium																												-0.304393
MIMAT0019707	miR-4646-5p	Medium						-0.446812																								0.528895
MIMAT0019708	miR-4646-3p	Medium																												-0.629102		0.358828
MIMAT0019709	miR-4647	Medium							-0.311103																			-0.391722
MIMAT0019710	miR-4648	Medium							-0.325675									-0.503778			-0.399576							-0.607926
MIMAT0019712	miR-4649-3p	Medium		-0.967056																			-0.311357										-0.404214
MIMAT0019713	miR-4650-5p	Medium																																-0.922577
MIMAT0019715	miR-4651	Medium	0.473694											-0.637073
MIMAT0019716	miR-4652-5p	Medium																											-0.374097
MIMAT0019717	miR-4652-3p	Medium																											-0.5641
MIMAT0019718	miR-4653-5p	Medium																0.984719				0.718106											0.997032	-0.894285
MIMAT0019719	miR-4653-3p	Medium														0.541271								-0.606985									-0.567497
MIMAT0019720	miR-4654	Medium																						0.997718											-0.489468
MIMAT0019722	miR-4655-3p	Medium								-0.76417
MIMAT0019726	miR-4659a-5p	Medium																														0.39217
MIMAT0019727	miR-4659a-3p	Medium											-0.354507				-0.616298															0.373694
MIMAT0019729	miR-4661-5p	Low																														0.621252	-0.310445
MIMAT0019731	miR-4662a-5p	Medium												-0.308646															0.325165	-0.384224
MIMAT0019732	miR-4662a-3p	Medium					-0.663935
MIMAT0019733	miR-4659b-5p	Medium						-0.83112										0.398972		0.61569								-0.99818				0.990125
MIMAT0019734	miR-4659b-3p	Medium																																-0.712139
MIMAT0019735	miR-4663	Medium					0.974363
MIMAT0019737	miR-4664-5p	Medium												-0.747539		-0.364432													-0.301083
MIMAT0019738	miR-4664-3p	Low												-0.751011					0.382873
MIMAT0019739	miR-4665-5p	Medium																										-0.344763
MIMAT0019741	miR-4666a-5p	Medium									0.613145
MIMAT0019742	miR-4666a-3p	Medium																	0.983211	-0.997007
MIMAT0019743	miR-4667-5p	High						-0.404537											-0.357494
MIMAT0019744	miR-4667-3p	Medium					0.308871			-0.384465																		-0.590028			-0.367475	0.466798
MIMAT0019745	miR-4668-5p	High																														0.577628
MIMAT0019746	miR-4668-3p	Medium		-0.392965
MIMAT0019747	miR-219b-5p	Medium		-0.506837													-0.428028							-0.384267
MIMAT0019748	miR-219b-3p	Medium																												-0.311867			-0.356259
MIMAT0019749	miR-4669	Medium																							-0.392103
MIMAT0019750	miR-4670-5p	Medium													-0.869096															-0.637591
MIMAT0019751	miR-4670-3p	Medium							-0.661904		-0.750412																			-0.413803	-0.358155	0.476629
MIMAT0019752	miR-4671-5p	Medium					-0.901648
MIMAT0019755	miR-4673	Medium									-0.440368					-0.445266
MIMAT0019756	miR-4674	Medium									-0.328073
MIMAT0019757	miR-4675	Medium						-0.52655	-0.533584																-0.615175
MIMAT0019758	miR-4676-5p	Medium																														0.417995	-0.439722
MIMAT0019759	miR-4676-3p	Medium															-0.612798											-0.384736
MIMAT0019760	miR-4677-5p	Medium																															-0.366997
MIMAT0019761	miR-4677-3p	Medium																															-0.440771
MIMAT0019763	miR-4679	Medium														0.566714														-0.339072			-0.431624		-0.941349
MIMAT0019764	miR-4680-5p	Medium															-0.560403									-0.459935				-0.368261
MIMAT0019765	miR-4680-3p	Medium						-0.457609								-0.542773												-0.329571			-0.306209	0.49878			-0.806497
MIMAT0019767	miR-4682	Medium	-0.980505												0.949861
MIMAT0019768	miR-4683	High															-0.697457						0.403982	-0.301225					-0.520322
MIMAT0019769	miR-4684-5p	Medium											0.318288																			0.430882
MIMAT0019770	miR-4684-3p	Medium													-0.952187												0.997353
MIMAT0019771	miR-4685-5p	Medium															-0.999488
MIMAT0019772	miR-4685-3p	Medium		-0.33437	0.430248												-0.404989
MIMAT0019774	miR-4687-5p	Medium			-0.990244			-0.324377									-0.554306												-0.706578
MIMAT0019775	miR-4687-3p	Medium																												-0.537047		0.366678	-0.343064
MIMAT0019776	miR-1343-3p	Medium																												-0.399876		-0.465355
MIMAT0019777	miR-4688	Medium																		-0.737628
MIMAT0019778	miR-4689	Medium				0.393843																							-0.824617	-0.969856		0.577807
MIMAT0019780	miR-4690-3p	Medium							-0.361559								-0.556992
MIMAT0019782	miR-4691-3p	Medium						-0.329877	-0.309028															-0.424517						-0.464075
MIMAT0019789	miR-4695-3p	High						-0.653095
MIMAT0019792	miR-4697-3p	Medium								-0.85738
MIMAT0019795	miR-4699-3p	Medium																				-0.30089								-0.402798					-0.343566
MIMAT0019796	miR-4700-5p	High							-0.309613																			-0.342521				0.39139
MIMAT0019797	miR-4700-3p	Medium														-0.527562
MIMAT0019798	miR-4701-5p	Medium	0.67529												0.378922	-0.379796		0.355414
MIMAT0019799	miR-4701-3p	Medium																		-0.84174
MIMAT0019802	miR-4703-3p	Medium					0.468594																					-0.318399
MIMAT0019803	miR-4704-5p	Low				-0.816254
MIMAT0019805	miR-4705	Medium											-0.493503													-0.343401				-0.30554		0.341556
MIMAT0019806	miR-4706	Medium														-0.895226																0.470386
MIMAT0019807	miR-4707-5p	Medium						-0.30459																											-0.431398
MIMAT0019808	miR-4707-3p	Medium	0.313908																									-0.353487							-0.466548
MIMAT0019809	miR-4708-5p	Medium				0.404233
MIMAT0019811	miR-4709-5p	Medium											-0.340168
MIMAT0019812	miR-4709-3p	Medium																		0.380736
MIMAT0019813	miR-203b-5p	Medium																																-0.376194
MIMAT0019814	miR-203b-3p	Medium												-0.321506																		-0.498684
MIMAT0019815	miR-4710	Medium																												-0.875091
MIMAT0019817	miR-4711-3p	Medium				-0.872507																0.815858
MIMAT0019818	miR-4712-5p	Medium						0.926616					-0.9617
MIMAT0019819	miR-4712-3p	Medium											-0.552045																		-0.816482
MIMAT0019823	miR-4714-3p	Medium			-0.835781												-0.679912
MIMAT0019825	miR-4715-3p	Medium					-0.554962		-0.602616																	0.769392
MIMAT0019826	miR-4716-5p	Medium																								-0.755006					-0.498432	0.643012
MIMAT0019827	miR-4716-3p	Low																												-0.56644		0.850002
MIMAT0019828	miR-3529-5p	Medium																												-0.468712
MIMAT0022741	miR-3529-3p	Medium																												-0.825305
MIMAT0019829	miR-4717-5p	Medium																													-0.966452
MIMAT0019830	miR-4717-3p	Medium																														0.452738
MIMAT0019831	miR-4718	Medium																	0.993553
MIMAT0019832	miR-4719	Medium																		-0.77504
MIMAT0019833	miR-4720-5p	Medium																	0.733612															-0.823816
MIMAT0019835	miR-4721	Medium																				-0.410161
MIMAT0019836	miR-4722-5p	Medium																															0.848269
MIMAT0019838	miR-4723-5p	Medium	0.651378																					-0.635619
MIMAT0019841	miR-4724-5p	Medium															-0.409727
MIMAT0019843	miR-4725-5p	Medium																														0.569508		0.512555
MIMAT0019844	miR-4725-3p	Medium																											-0.564519
MIMAT0019845	miR-4726-5p	Medium									-0.312448
MIMAT0019846	miR-4726-3p	High						-0.434843																-0.89995						-0.618746
MIMAT0019847	miR-4727-5p	Medium															-0.583454							-0.338329						-0.346685
MIMAT0019848	miR-4727-3p	Medium					0.436912				-0.886486															-0.877372		-0.557281
MIMAT0019849	miR-4728-5p	Medium																						-0.610214				-0.300967
MIMAT0019850	miR-4728-3p	Medium																					0.301142
MIMAT0019851	miR-4729	Medium																	0.637814			-0.655971												0.785447
MIMAT0019852	miR-4730	Medium		0.994004																										-0.636474	-0.577758
MIMAT0019853	miR-4731-5p	Medium						-0.499603																-0.598344
MIMAT0019854	miR-4731-3p	Medium						-0.64545													-0.805083		-0.901092
MIMAT0019856	miR-4732-3p	Medium																					0.353506
MIMAT0019857	miR-4733-5p	Medium			0.615362																								-0.331329			0.411108
MIMAT0019859	miR-4734	Medium																											0.832989					-0.347541
MIMAT0019860	miR-4735-5p	Medium																					0.47604				0.43562
MIMAT0019862	miR-4736	Medium									0.503664						-0.412323																	0.317587
MIMAT0019864	miR-3064-5p	High															-0.479969													-0.317225
MIMAT0019865	miR-3064-3p	Medium																												-0.362055
MIMAT0019867	miR-4738-3p	Medium																												-0.342281
MIMAT0019868	miR-4739	High		-0.580997
MIMAT0019869	miR-4740-5p	Medium															-0.705732						0.369856					-0.383343
MIMAT0019871	miR-4741	Medium																															-0.300982
MIMAT0019872	miR-4742-5p	Medium		0.958504					-0.869082
MIMAT0019873	miR-4742-3p	High			0.466714												-0.350317															-0.357603
MIMAT0019874	miR-4743-5p	Medium																		-0.339763										-0.343156					0.567492
MIMAT0022978	miR-4743-3p	Medium																						-0.66554						-0.540185		0.510569
MIMAT0019875	miR-4744	Medium							-0.542907							-0.408828								-0.907242						-0.774446
MIMAT0019876	miR-3591-5p	Medium																											-0.936109
MIMAT0019877	miR-3591-3p	Medium			0.988792								-0.992573						0.99549
MIMAT0019879	miR-4745-3p	Medium															-0.532763													-0.517843
MIMAT0019880	miR-4746-5p	Low															-0.419266			-0.301132												-0.511704	-0.574138
MIMAT0019882	miR-4747-5p	Medium	0.74265								-0.880974
MIMAT0019883	miR-4747-3p	Medium																												-0.5944
MIMAT0019884	miR-4748	Medium																										-0.417422
MIMAT0019885	miR-4749-5p	Medium																														0.344408
MIMAT0019886	miR-4749-3p	Medium								-0.449051
MIMAT0019887	miR-4750-5p	Medium														-0.580255						-0.396825										0.706858
MIMAT0022979	miR-4750-3p	Medium																	-0.43562
MIMAT0019888	miR-4751	Medium		0.583174																						-0.958298
MIMAT0019889	miR-4752	Medium											-0.378098																	-0.52691
MIMAT0019890	miR-4753-5p	Medium									-0.339101													-0.46279		-0.338718				-0.46615
MIMAT0019891	miR-4753-3p	Medium												0.975269											-0.81427		0.488977	-0.468031		-0.513376
MIMAT0019892	miR-371b-5p	Medium				0.428201		-0.491567							-0.584661																	0.61485
MIMAT0019893	miR-371b-3p	Medium																																-0.41354
MIMAT0019894	miR-4754	Low																								-0.325474				-0.505856
MIMAT0019895	miR-4755-5p	Medium																						-0.544577								0.359363
MIMAT0019896	miR-4755-3p	High																														0.306332	-0.348586
MIMAT0019897	miR-499b-5p	Medium						0.481101										0.462846					0.8345
MIMAT0019898	miR-499b-3p	Medium						0.705212											0.521479									0.987187
MIMAT0019899	miR-4756-5p	Medium																			0.964603
MIMAT0019900	miR-4756-3p	Medium																											0.373613
MIMAT0019901	miR-4757-5p	Medium							-0.471633																					-0.375797
MIMAT0019902	miR-4757-3p	Low	0.997895			0.496241																												-0.472685
MIMAT0019903	miR-4758-5p	Medium																												-0.397054
MIMAT0019904	miR-4758-3p	Medium															-0.749306		0.372351								0.558027			-0.53522
MIMAT0019905	miR-4759	Medium																				-0.560994
MIMAT0019906	miR-4760-5p	Medium				0.587288				0.963328	-0.917119																					-0.410711
MIMAT0019908	miR-4761-5p	Medium								0.736004
MIMAT0019910	miR-4762-5p	Low															-0.462555															0.327174
MIMAT0019911	miR-4762-3p	Low															-0.535843													-0.31295		0.314367	-0.362903
MIMAT0019912	miR-4763-5p	Medium		-0.344791																										-0.320169
MIMAT0019913	miR-4763-3p	Medium						-0.473598
MIMAT0019914	miR-4764-5p	Medium															-0.999887															0.485675
MIMAT0019917	miR-4766-5p	Medium															-0.414447															0.307249	-0.398635
MIMAT0019918	miR-4766-3p	Medium															-0.349181																-0.436463
MIMAT0019919	miR-4767	Medium																														0.4351
MIMAT0019920	miR-4768-5p	Medium			0.566911																					-0.301664				-0.374044
MIMAT0019922	miR-4769-5p	Medium																				0.358346
MIMAT0019923	miR-4769-3p	Medium				0.553042
MIMAT0019924	miR-4770	High														-0.452208			0.330246
MIMAT0019926	miR-4772-5p	Medium					0.3014																									0.451222		0.350412
MIMAT0019927	miR-4772-3p	Medium					0.322138		0.306093														0.300785									0.569383		0.442056	0.395397
MIMAT0019928	miR-4773	Medium				0.566904	0.401585				-0.797349
MIMAT0019930	miR-4774-3p	Medium																	-0.99854					-0.998797
MIMAT0019931	miR-4775	Medium																												-0.523468
MIMAT0019932	miR-4776-5p	Medium																			-0.32006
MIMAT0019933	miR-4776-3p	Medium														0.999911
MIMAT0019934	miR-4777-5p	Medium																			-0.878942														-0.971683
MIMAT0019935	miR-4777-3p	Low															-0.350767													-0.302132
MIMAT0019936	miR-4778-5p	Medium									-0.454676																			-0.837604
MIMAT0019938	miR-4779	Medium																															-0.630638
MIMAT0019939	miR-4780	Medium																													-0.304374	0.395401
MIMAT0019941	miR-4436b-3p	Medium																									0.998694
MIMAT0019942	miR-4781-5p	Medium				0.388105																										0.617822
MIMAT0019943	miR-4781-3p	Medium			0.582011
MIMAT0019944	miR-4782-5p	Medium												-0.75283
MIMAT0019945	miR-4782-3p	Medium								-0.885554
MIMAT0019948	miR-4784	Medium																												-0.320897			-0.323111
MIMAT0019949	miR-4785	Medium									-0.375469			-0.979228
MIMAT0019950	miR-1245b-5p	Medium																0.417898												-0.388401
MIMAT0019951	miR-1245b-3p	Medium																				-0.503353										0.498454
MIMAT0019952	miR-2467-5p	Medium																												-0.897407
MIMAT0019953	miR-2467-3p	Medium								0.997418
MIMAT0019954	miR-4786-5p	Medium															-0.335731																-0.306905
MIMAT0019955	miR-4786-3p	Medium			-0.827438																									-0.336609					0.53763
MIMAT0019958	miR-4788	Medium			0.518506												-0.489943
MIMAT0019960	miR-4789-3p	Medium							-0.355839																					-0.70659				-0.356816
MIMAT0019961	miR-4790-5p	Medium																0.343036																-0.690162
MIMAT0019962	miR-4790-3p	Medium							0.953326		-0.748394																							-0.599524
MIMAT0019963	miR-4791	Medium															-0.409508							-0.301276						-0.418069		0.303003	-0.44723
MIMAT0019964	miR-4792	Medium									-0.964673																			-0.829294
MIMAT0019965	miR-4793-5p	Medium																			0.992491
MIMAT0019966	miR-4793-3p	Medium															-0.854563													-0.699839
MIMAT0019967	miR-4794	Medium							0.980191																										-0.998459
MIMAT0019968	miR-4795-5p	Medium				0.806139
MIMAT0019969	miR-4795-3p	High																														0.333896
MIMAT0019970	miR-4796-5p	Low							-0.317015																					-0.421516		0.321247
MIMAT0019971	miR-4796-3p	Medium																												-0.977405
MIMAT0019973	miR-4797-3p	Medium		-0.462041													-0.405765															0.39448	-0.432
MIMAT0019974	miR-4798-5p	Medium														-0.983341														-0.570574
MIMAT0019976	miR-4799-5p	Medium																		-0.393595
MIMAT0019979	miR-4800-3p	Medium																						-0.382864											-0.916584
MIMAT0019981	miR-4802-5p	Medium																	0.580158
MIMAT0019982	miR-4802-3p	Medium												-0.710196					0.468029	-0.30799										-0.435723		0.310239
MIMAT0019983	miR-4803	Medium																														0.434392			-0.991402
MIMAT0019985	miR-4804-3p	Medium						-0.359683	-0.384276																					-0.368115
MIMAT0021017	miR-4999-5p	Medium															-0.477525															0.437804
MIMAT0021018	miR-4999-3p	Medium			0.53634												-0.404731							-0.617309								0.360255
MIMAT0021022	miR-5001-3p	Medium		-0.300579
MIMAT0021023	miR-5002-5p	Medium																														-0.493144
MIMAT0021024	miR-5002-3p	Low								0.350911																		-0.546986		-0.521277
MIMAT0021025	miR-5003-5p	Medium						-0.36517																						-0.606279
MIMAT0021028	miR-5004-3p	Medium																														-0.607908
MIMAT0021030	miR-548ao-3p	Medium																									0.787428			-0.58393
MIMAT0021033	miR-5006-5p	Medium				0.511218
MIMAT0021034	miR-5006-3p	Medium									-0.570957			0.772605																		0.691608
MIMAT0021035	miR-5007-5p	Medium																		-0.989309
MIMAT0021039	miR-5008-5p	Medium																														0.325989
MIMAT0021040	miR-5008-3p	Medium																				-0.374375	0.476039
MIMAT0021041	miR-5009-5p	Medium		-0.64123																								-0.378265				0.300679
MIMAT0021042	miR-5009-3p	Medium																			-0.974915
MIMAT0021043	miR-5010-5p	Medium								0.363241
MIMAT0020541	miR-5047	Medium																													-0.999223
MIMAT0021079	miR-5087	Medium						-0.428843																		-0.935765						0.372206
MIMAT0021080	miR-5088-5p	High	0.751815						-0.508525															-0.576252						-0.721953
MIMAT0027041	miR-5088-3p	Low																																-0.499517
MIMAT0021081	miR-5089-5p	Medium																									0.464657					0.313231
MIMAT0022984	miR-5089-3p	Medium																												-0.835224			-0.929433
MIMAT0021082	miR-5090	Medium																														0.409273
MIMAT0021083	miR-5091	Low												-0.40909			-0.471218															0.302133	-0.363645
MIMAT0021084	miR-5092	Medium																		-0.340999			-0.999421
MIMAT0021086	miR-5094	Medium																									0.36469
MIMAT0021117	miR-5187-5p	Medium			0.412875												-0.400635
MIMAT0021118	miR-5187-3p	Medium	0.670603																													0.451129			-0.717208
MIMAT0021119	miR-5188	Low								-0.463234	-0.640872
MIMAT0021120	miR-5189-5p	High																							-0.783758
MIMAT0027088	miR-5189-3p	Medium		-0.924472					-0.519155																			-0.822918
MIMAT0021121	miR-5190	Medium																										0.936891
MIMAT0021124	miR-5193	Medium																														0.311913
MIMAT0021125	miR-5194	Medium																														0.770649
MIMAT0021129	miR-5196-3p	Medium		0.992668			0.465425																									0.725832
MIMAT0022257	miR-5571-5p	Medium																																0.318657
MIMAT0022258	miR-5571-3p	Medium	0.737806															0.318275										0.545204						0.368707
MIMAT0022259	miR-5100	Medium																		-0.346107
MIMAT0022263	miR-548aq-5p	Medium					-0.463908																											-0.333415
MIMAT0022266	miR-548ar-3p	High																			-0.396127											0.348066
MIMAT0022268	miR-548as-3p	Medium																	-0.578358
MIMAT0022269	miR-5579-5p	Medium																	0.325294											-0.649674
MIMAT0022270	miR-5579-3p	Medium													-0.325157															-0.498903					-0.303393
MIMAT0022272	miR-664b-3p	High															-0.315648																	-0.328744
MIMAT0022273	miR-5580-5p	Medium																													-0.429895
MIMAT0022274	miR-5580-3p	Medium						-0.418329																				-0.374644		-0.525515	-0.300808
MIMAT0022275	miR-5581-5p	Medium																														0.52897			-0.882749
MIMAT0022276	miR-5581-3p	Medium																															-0.35862
MIMAT0022277	miR-548at-5p	Medium																						-0.48196
MIMAT0022278	miR-548at-3p	Medium																								0.966701
MIMAT0022280	miR-5582-3p	Medium																												-0.364665
MIMAT0022281	miR-5583-5p	Medium											-0.968693
MIMAT0022282	miR-5583-3p	Medium																	0.905149		0.51745
MIMAT0022283	miR-5584-5p	High						-0.409285													-0.330801						0.633922						-0.330402
MIMAT0022284	miR-5584-3p	Medium																																	0.998155
MIMAT0022285	miR-5585-5p	Medium																		-0.397094			-0.944733								-0.503963	0.567086
MIMAT0022287	miR-5586-5p	Medium					0.300457																			0.426468			0.30856					0.438409
MIMAT0022288	miR-5586-3p	Medium									-0.649723																	-0.483319		-0.732204
MIMAT0022289	miR-5587-5p	Medium																	0.677731
MIMAT0022290	miR-5587-3p	Medium														-0.965538															0.803567
MIMAT0022292	miR-548au-3p	Medium		-0.35809													-0.372227													-0.385272		0.446392	-0.504551
MIMAT0022293	miR-1295b-5p	Medium				0.311123									-0.319066			0.401544									0.32039
MIMAT0022294	miR-1295b-3p	Medium									-0.728913														-0.774772							0.612138
MIMAT0022295	miR-5588-5p	Medium					0.357605																								-0.414601
MIMAT0022296	miR-5588-3p	Medium	0.700173															0.309528
MIMAT0022297	miR-5589-5p	Medium																								-0.60545
MIMAT0022298	miR-5589-3p	Medium																								-0.853981
MIMAT0022303	miR-548av-5p	Medium									0.766545							0.359809
MIMAT0022468	miR-5680	Medium												-0.403894
MIMAT0022469	miR-5681a	Medium					-0.453411
MIMAT0022470	miR-5682	Low																			-0.30144													-0.327073	-0.779516
MIMAT0022471	miR-548aw	Medium																												-0.36652
MIMAT0022472	miR-5683	Medium																							-0.318833							-0.360857
MIMAT0022473	miR-5684	Medium															-0.435063
MIMAT0022474	miR-548ax	Medium				0.551625									-0.742029															-0.590017	-0.91978
MIMAT0022476	miR-5692c	Medium								-0.706324																					-0.693397			-0.696675
MIMAT0022478	miR-5687	Medium																0.385599										-0.46856				0.369471
MIMAT0022480	miR-5681b	Medium																						-0.512171						-0.69575		0.790174
MIMAT0022482	miR-5690	Medium																												-0.342792		0.364162	-0.346599
MIMAT0022483	miR-5691	Medium											-0.498021
MIMAT0022484	miR-5692a	Medium																																-0.393225
MIMAT0022485	miR-4666b	Medium											-0.934063
MIMAT0022486	miR-5693	Medium													-0.846631	-0.805087			0.482102	-0.794191
MIMAT0022487	miR-5694	Medium												-0.821943
MIMAT0022488	miR-5695	High																						-0.363016		-0.396479									0.468877
MIMAT0022489	miR-5696	Medium																						-0.387474						-0.427441
MIMAT0022490	miR-5697	Medium						-0.601959									-0.749287		0.371542											-0.414904		0.352727
MIMAT0022491	miR-5698	Medium																														0.366291	-0.312199
MIMAT0027103	miR-5699-5p	Medium															-0.632737
MIMAT0022492	miR-5699-3p	Medium							-0.356469															-0.310781						-0.342431		0.302314
MIMAT0022493	miR-5700	Medium																	0.630682
MIMAT0022494	miR-5701	Medium			-0.999957														-0.425943					-0.320999			0.72857					0.36024
MIMAT0022496	miR-5703	Medium															-0.438045													-0.480909
MIMAT0022499	miR-5705	Medium						-0.999445																				-0.458369
MIMAT0022500	miR-5706	Medium															-0.328443																-0.430331
MIMAT0022502	miR-5708	Medium																												0.30162		0.474721
MIMAT0023701	miR-6076	Low																							-0.620597
MIMAT0023709	miR-6084	Low														-0.962613														-0.998681
MIMAT0023712	miR-6087	Medium																		-0.322654
MIMAT0024598	miR-6125	Low	0.310817																													0.330818	-0.410551
MIMAT0024613	miR-6129	Medium				0.382202																								-0.392081
MIMAT0024614	miR-6130	Medium												-0.998688
MIMAT0024616	miR-6132	Medium													0.997618
MIMAT0024618	miR-6134	Medium																				-0.841411						-0.933546
MIMAT0025450	miR-6499-5p	Medium														-0.551605
MIMAT0025451	miR-6499-3p	Medium														-0.710614
MIMAT0025453	miR-548ay-3p	Medium																												-0.509973		0.40471
MIMAT0025456	miR-548az-5p	Medium			0.946875																										-0.305216
MIMAT0025458	miR-6501-5p	Medium	0.303356																													0.357724	-0.33104
MIMAT0025459	miR-6501-3p	Medium													-0.430744	-0.405427														-0.448337		0.327455
MIMAT0025460	miR-6502-5p	Medium												0.343007									0.410311												-0.51057
MIMAT0025461	miR-6502-3p	Medium																			0.898379
MIMAT0025462	miR-6503-5p	Medium	0.310834																0.406052								0.304463
MIMAT0025463	miR-6503-3p	Medium	0.309478														-0.45618		0.41505
MIMAT0025466	miR-6505-5p	Medium					0.518533																							-0.68096
MIMAT0025467	miR-6505-3p	Medium							-0.469051									0.60605							0.302909		0.365187				-0.5569
MIMAT0025468	miR-6506-5p	Medium									-0.484656
MIMAT0025469	miR-6506-3p	Low								-0.997974																						0.999944
MIMAT0025471	miR-6507-3p	Medium																															-0.727979
MIMAT0025472	miR-6508-5p	Medium																						-0.370852				-0.386237
MIMAT0025473	miR-6508-3p	Medium																										-0.458723		-0.42352	-0.452109	0.360161
MIMAT0025474	miR-6509-5p	Medium																														0.479682	-0.521956
MIMAT0025475	miR-6509-3p	Medium																												-0.436471			-0.32907
MIMAT0025476	miR-6510-5p	Medium				0.627847
MIMAT0025477	miR-6510-3p	Medium														-0.33905												0.33056					0.32844
MIMAT0025480	miR-6512-5p	Medium				0.308988
MIMAT0025481	miR-6512-3p	Medium				0.302403			-0.999465																						-0.517309			-0.456283
MIMAT0025482	miR-6513-5p	Medium		-0.845704																										-0.445762
MIMAT0025483	miR-6513-3p	Medium																												-0.348695		0.312337
MIMAT0025485	miR-6514-3p	Medium																												-0.313753		0.403472
MIMAT0025486	miR-6515-5p	Medium												-0.414083																-0.476102		0.344992
MIMAT0025841	miR-6715a-3p	Medium														-0.38315		0.311378						-0.442145								0.482074
MIMAT0025842	miR-6715b-5p	Medium																-0.779606
MIMAT0025843	miR-6715b-3p	Medium											-0.569474			-0.518946							-0.88618							-0.570181		0.385207		-0.303878
MIMAT0025844	miR-6716-5p	Medium							-0.999792
MIMAT0025845	miR-6716-3p	Low		-0.337694	-0.408645																											-0.372316
MIMAT0025848	miR-6511b-3p	Medium																														-0.47671	0.33992
MIMAT0025849	miR-6718-5p	Medium		0.396886	-0.391122																						0.303612
MIMAT0027345	miR-6720-5p	Medium																						-0.356565
MIMAT0025851	miR-6720-3p	Medium		-0.483381																												-0.535605
MIMAT0025852	miR-6721-5p	Medium					0.301847																								-0.359006
MIMAT0025855	miR-6723-5p	Medium																												-0.576116
MIMAT0025858	miR-892c-3p	Medium																																-0.367338
MIMAT0027353	miR-6726-5p	Medium																								-0.613912						0.565847
MIMAT0027354	miR-6726-3p	Low																											-0.407716			0.352121
MIMAT0027356	miR-6727-3p	Medium											0.40378
MIMAT0027357	miR-6728-5p	Medium																								-0.358011		-0.429597		-0.418266
MIMAT0027359	miR-6729-5p	Medium																								-0.65905
MIMAT0027360	miR-6729-3p	Low						-0.447185																								0.45156		-0.310733
MIMAT0027361	miR-6730-5p	Low																						-0.695308						-0.342309
MIMAT0027362	miR-6730-3p	Medium																										-0.322008		-0.547766
MIMAT0027363	miR-6731-5p	Medium																														0.323052
MIMAT0027364	miR-6731-3p	Medium				0.479537										0.7063	-0.548516
MIMAT0027366	miR-6732-3p	Medium																								-0.502545					0.34615	0.836345
MIMAT0027367	miR-6733-5p	Low																														0.730391
MIMAT0027368	miR-6733-3p	Medium															-0.481685
MIMAT0027369	miR-6734-5p	Medium															-0.47156
MIMAT0027370	miR-6734-3p	Medium																												-0.500846
MIMAT0027371	miR-6735-5p	Medium	0.655171																							-0.437074				-0.506589
MIMAT0027372	miR-6735-3p	Medium																													0.550747			-0.340957	0.999115
MIMAT0027373	miR-6736-5p	Low		-0.659672				-0.391184									-0.988934														-0.350316	0.384746
MIMAT0027374	miR-6736-3p	Medium																									0.923537					0.849404
MIMAT0027375	miR-6737-5p	Medium	0.809896								-0.313667																	-0.478975
MIMAT0027376	miR-6737-3p	Medium						-0.363663																						-0.5117
MIMAT0027378	miR-6738-3p	Medium																						-0.724999					-0.621221		-0.320152
MIMAT0027380	miR-6739-3p	Medium																										-0.405535		-0.378261			-0.385451
MIMAT0027381	miR-6740-5p	Medium																		-0.42057				-0.908252
MIMAT0027382	miR-6740-3p	Medium															-0.969638											-0.433333
MIMAT0027383	miR-6741-5p	Medium									-0.774941
MIMAT0027384	miR-6741-3p	Medium																												-0.604077
MIMAT0027386	miR-6742-3p	Medium																					0.618744									0.573722
MIMAT0027387	miR-6743-5p	Medium																							0.686959
MIMAT0027388	miR-6743-3p	Medium																					0.532675									0.472134
MIMAT0027389	miR-6744-5p	Low											-0.436059
MIMAT0027391	miR-6745	Medium																																-0.608176
MIMAT0027393	miR-6746-3p	Medium		0.384898																										-0.454146		0.562552	-0.413151
MIMAT0027394	miR-6747-5p	Medium																															-0.713272
MIMAT0027395	miR-6747-3p	Medium									-0.32754			0.377081												-0.341395				-0.441561					0.328239
MIMAT0027397	miR-6748-3p	Medium														-0.37923												-0.380323
MIMAT0027398	miR-6749-5p	Medium													-0.99897																	0.583279
MIMAT0027399	miR-6749-3p	Medium																														0.378041
MIMAT0027400	miR-6750-5p	Medium							-0.611912															-0.689233								0.404685		-0.355978
MIMAT0027401	miR-6750-3p	Medium																												-0.581797		0.403279
MIMAT0027402	miR-6751-5p	Medium																											-0.629719			0.414433
MIMAT0027404	miR-6752-5p	Medium					-0.994754																											-0.943709
MIMAT0027405	miR-6752-3p	Medium																															-0.846766
MIMAT0027407	miR-6753-3p	Low			0.999847						-0.549571
MIMAT0027408	miR-6754-5p	Medium	0.745288	-0.442913										-0.886165					0.430045											-0.609895
MIMAT0027409	miR-6754-3p	Medium															-0.585987							-0.623362			0.381168				-0.461107
MIMAT0027410	miR-6755-5p	Medium																														-0.317499
MIMAT0027411	miR-6755-3p	Medium					0.498384											0.758371
MIMAT0027412	miR-6756-5p	Medium																				-0.308032
MIMAT0027413	miR-6756-3p	Low				0.437092	0.389383												-0.332606											-0.586783		0.386807
MIMAT0027415	miR-6757-3p	Low						-0.586186			-0.667098																			-0.625494	-0.746669				-0.889607
MIMAT0027417	miR-6758-3p	Medium																													-0.313737
MIMAT0027418	miR-6759-5p	Medium																		-0.811212
MIMAT0027419	miR-6759-3p	Low																		-0.998337
MIMAT0027422	miR-6761-5p	Low									-0.327257												0.417302						-0.347008			-0.427514
MIMAT0027423	miR-6761-3p	Low															-0.73946											-0.358742				0.481374
MIMAT0027424	miR-6762-5p	Medium														-0.737189				0.582532
MIMAT0027425	miR-6762-3p	Medium															-0.479592
MIMAT0027426	miR-6763-5p	Medium																												-0.426718
MIMAT0027427	miR-6763-3p	Medium																																-0.974216
MIMAT0027428	miR-6764-5p	Medium												-0.444329																-0.308214			-0.312193
MIMAT0027429	miR-6764-3p	Low																								-0.509743
MIMAT0027433	miR-6766-3p	Medium			0.800344																							-0.362301				0.309318
MIMAT0027434	miR-6767-5p	Low																			-0.426166						-0.351151
MIMAT0027435	miR-6767-3p	Low																	0.828341
MIMAT0027436	miR-6768-5p	Medium																												0.997308
MIMAT0027437	miR-6768-3p	Medium															-0.99728										0.998981
MIMAT0027439	miR-6769a-3p	Medium		-0.368567							-0.529571																			-0.470685
MIMAT0027442	miR-6771-5p	Medium	0.554366							-0.660657																-0.758303
MIMAT0027443	miR-6771-3p	Medium						-0.941119																							-0.919698
MIMAT0027444	miR-6772-5p	Medium																		0.46458								-0.973526
MIMAT0027446	miR-6773-5p	Medium						-0.359884								-0.441364																	-0.375273
MIMAT0027447	miR-6773-3p	Medium																			0.328047
MIMAT0027448	miR-6774-5p	Medium																														0.788097
MIMAT0027449	miR-6774-3p	Low															-0.502339
MIMAT0027451	miR-6775-3p	Medium																			-0.308071
MIMAT0027453	miR-6776-3p	Medium																								-0.911244					-0.530888	0.862235
MIMAT0027455	miR-6777-3p	Medium																											-0.981448
MIMAT0027457	miR-6778-3p	Medium	0.951755				0.400275																	-0.472185						-0.824814
MIMAT0027458	miR-6779-5p	Medium									-0.492982																			-0.374598		0.400571
MIMAT0027459	miR-6779-3p	Medium																								-0.898637
MIMAT0027460	miR-6780a-5p	Medium																										-0.986618	-0.993864
MIMAT0027461	miR-6780a-3p	Medium															-0.892747							-0.591414
MIMAT0027462	miR-6781-5p	Medium																														0.768589
MIMAT0027463	miR-6781-3p	Medium																												-0.416841
MIMAT0027464	miR-6782-5p	Medium				0.898332													0.543178											-0.954798
MIMAT0027465	miR-6782-3p	Low									-0.445974		-0.366454																		-0.392368	0.488012
MIMAT0027466	miR-6783-5p	Medium																												-0.477795
MIMAT0027467	miR-6783-3p	Medium															-0.416124													-0.32023		-0.31797
MIMAT0027469	miR-6784-3p	Medium						-0.370077
MIMAT0027470	miR-6785-5p	Medium	-0.579675														-0.99946													-0.532858			0.661993
MIMAT0027471	miR-6785-3p	Low	-0.984248															0.77727									0.476882	-0.668044
MIMAT0027472	miR-6786-5p	Medium						-0.998709							-0.999149
MIMAT0027473	miR-6786-3p	Medium						-0.408391									-0.82203											-0.742513		-0.56267
MIMAT0027474	miR-6787-5p	Medium																	0.839695								0.750659
MIMAT0027475	miR-6787-3p	Medium						-0.32488								-0.370638										-0.694581
MIMAT0027476	miR-6788-5p	Medium						-0.881904									-0.797939								-0.328674
MIMAT0027477	miR-6788-3p	Low											-0.398124
MIMAT0027478	miR-6789-5p	Medium				0.388714					-0.932912
MIMAT0027479	miR-6789-3p	Medium											0.532022			-0.687256
MIMAT0027480	miR-6790-5p	Medium																			-0.891905
MIMAT0027481	miR-6790-3p	Low								-0.650853												-0.365004
MIMAT0027482	miR-6791-5p	Medium								0.958365			0.549529
MIMAT0027485	miR-6792-3p	Medium		-0.758707												-0.49773
MIMAT0027487	miR-6793-3p	Low																						-0.466099
MIMAT0027488	miR-6794-5p	Low																								-0.690677					-0.992085				-0.789763
MIMAT0027490	miR-6795-5p	Medium																		-0.609894
MIMAT0027491	miR-6795-3p	Medium							-0.553411											-0.329863		0.522522
MIMAT0027492	miR-6796-5p	Medium						-0.416832
MIMAT0027493	miR-6796-3p	Medium						-0.578074														-0.44964													-0.806983
MIMAT0027494	miR-6797-5p	Medium																													-0.691479		0.611429
MIMAT0027495	miR-6797-3p	Medium																												-0.318294
MIMAT0027497	miR-6798-3p	Low															-0.435139
MIMAT0027499	miR-6799-3p	Low																-0.618575												-0.727824
MIMAT0027500	miR-6800-5p	Medium					0.656523															0.440522
MIMAT0027501	miR-6800-3p	Low											0.320146								0.448423									-0.763094
MIMAT0027502	miR-6801-5p	Low																-0.467046												-0.51552
MIMAT0027504	miR-6802-5p	Low																						-0.582668								0.684272
MIMAT0027505	miR-6802-3p	Low															-0.370021							-0.391056
MIMAT0027506	miR-6803-5p	Medium									-0.961228		-0.819427
MIMAT0027507	miR-6803-3p	Low															-0.405368
MIMAT0027508	miR-6804-5p	Medium														-0.494708								-0.584039								0.47286
MIMAT0027509	miR-6804-3p	Medium																															-0.624474
MIMAT0027510	miR-6805-5p	Medium												-0.697604		-0.341093												-0.374197				0.326219
MIMAT0027511	miR-6805-3p	Medium																			-0.545033
MIMAT0027512	miR-6806-5p	Low				0.945275
MIMAT0027514	miR-6807-5p	Medium			0.970506
MIMAT0027515	miR-6807-3p	Medium																												-0.543286
MIMAT0027517	miR-6808-3p	Medium												0.360194																-0.364946
MIMAT0027518	miR-6809-5p	Low					-0.809201													-0.839999										-0.77227
MIMAT0027519	miR-6809-3p	Medium				-0.452935																								-0.56586
MIMAT0027520	miR-6810-5p	Medium		0.999974															0.454486					-0.76271
MIMAT0027521	miR-6810-3p	Medium			0.604676																											0.366658
MIMAT0027522	miR-6811-5p	Medium																										-0.5267
MIMAT0027523	miR-6811-3p	Medium																										-0.444536
MIMAT0027524	miR-6812-5p	Medium						-0.524737											-0.363563
MIMAT0027525	miR-6812-3p	Low																										-0.561307		-0.646427			-0.448374
MIMAT0027526	miR-6813-5p	Medium																														0.524608
MIMAT0027527	miR-6813-3p	Medium	0.314												-0.449268									-0.398195				-0.379843		-0.492647
MIMAT0027528	miR-6814-5p	Medium																															-0.715438
MIMAT0027530	miR-6815-5p	Medium																												-0.334047
MIMAT0027531	miR-6815-3p	Low		-0.322053																										-0.367028
MIMAT0027533	miR-6816-3p	Low																														0.462998
MIMAT0027534	miR-6817-5p	Medium													-0.949336
MIMAT0027535	miR-6817-3p	Medium																														0.693283
MIMAT0027536	miR-6818-5p	Medium																												-0.437245		0.317029
MIMAT0027537	miR-6818-3p	Medium																					0.587058							-0.39728
MIMAT0027539	miR-6819-3p	Medium						-0.447213															0.85968
MIMAT0027540	miR-6820-5p	Medium								0.610519																		-0.898173						-0.441707
MIMAT0027541	miR-6820-3p	Medium															-0.37482
MIMAT0027542	miR-6821-5p	Medium			-0.84702																												-0.445791
MIMAT0027544	miR-6822-5p	Medium			0.997784																								0.909917
MIMAT0027545	miR-6822-3p	Low				0.824312	0.32806												-0.38427	0.523817	-0.815872						0.538106						0.954046
MIMAT0027546	miR-6823-5p	Medium																									0.498263
MIMAT0027547	miR-6823-3p	Low				-0.549546														-0.672931
MIMAT0027548	miR-6824-5p	Medium					0.370682																									0.440087
MIMAT0027549	miR-6824-3p	Low				0.344859												0.352689										-0.424938		-0.596296	-0.450639
MIMAT0027550	miR-6825-5p	Medium			0.964801						-0.461995
MIMAT0027551	miR-6825-3p	Medium		-0.920704																									-0.796994			0.584953
MIMAT0027552	miR-6826-5p	Medium																						-0.998869							-0.758724
MIMAT0027553	miR-6826-3p	Medium						-0.362691			-0.446422				0.380413														-0.575153
MIMAT0027554	miR-6827-5p	Low																0.489053								-0.50176		-0.478294
MIMAT0027555	miR-6827-3p	Medium																			-0.390026							-0.532668
MIMAT0027558	miR-6829-5p	Medium						0.546968					0.498398								-0.401111							-0.9261
MIMAT0027559	miR-6829-3p	Medium																		-0.53474													-0.967898
MIMAT0027560	miR-6830-5p	Medium																	-0.673096
MIMAT0027561	miR-6830-3p	Low									-0.89459				-0.630433															-0.491396
MIMAT0027562	miR-6831-5p	Medium																												-0.884115
MIMAT0027564	miR-6832-5p	Medium							0.999731							-0.912214
MIMAT0027565	miR-6832-3p	Medium						-0.375624								-0.443218														-0.65042
MIMAT0027567	miR-6833-3p	Medium															-0.413081											-0.304935	-0.340546	-0.369677
MIMAT0027568	miR-6834-5p	Low																												-0.471506
MIMAT0027569	miR-6834-3p	Low																			-0.694387
MIMAT0027571	miR-6835-3p	Low																													-0.658792
MIMAT0027573	miR-6780b-3p	Low																										-0.493694				0.611923
MIMAT0027574	miR-6836-5p	Medium					0.384254														-0.374412			-0.336883								0.363712
MIMAT0027575	miR-6836-3p	Low																			-0.361304			-0.48734								0.608005
MIMAT0027576	miR-6837-5p	Medium							-0.353737		-0.375463
MIMAT0027577	miR-6837-3p	Low															-0.404621															-0.311932
MIMAT0027579	miR-6838-3p	Medium															-0.502792										0.437227	-0.302894					-0.398566
MIMAT0027580	miR-6839-5p	Medium															-0.489449								-0.865885					-0.425583
MIMAT0027581	miR-6839-3p	Medium																															-0.771458
MIMAT0027582	miR-6840-5p	Low				0.401289											-0.894541																		0.791493
MIMAT0027583	miR-6840-3p	Medium																									0.998433
MIMAT0027586	miR-6842-5p	Medium															-0.73783							-0.522617					-0.828184
MIMAT0027587	miR-6842-3p	Medium															-0.472409
MIMAT0027589	miR-6844	Low																												-0.466317
MIMAT0027590	miR-6845-5p	Low					0.498716									-0.523678			0.334386		0.623772										-0.870596
MIMAT0027591	miR-6845-3p	Medium																				0.332752										0.670898
MIMAT0027592	miR-6846-5p	Medium				0.506057	0.371068			-0.557873
MIMAT0027594	miR-6847-5p	Low														-0.397914														-0.584513			-0.535598
MIMAT0027595	miR-6847-3p	Medium																		0.575911
MIMAT0027597	miR-6848-3p	Medium																														0.892962
MIMAT0027598	miR-6849-5p	Low																					0.997224
MIMAT0027599	miR-6849-3p	Medium											-0.514434		-0.666182
MIMAT0027600	miR-6850-5p	Low														-0.4431														-0.710432		0.368268
MIMAT0027601	miR-6850-3p	Medium																												-0.999339
MIMAT0027602	miR-6851-5p	Medium	-0.598754						-0.629395
MIMAT0027603	miR-6851-3p	Low																						-0.443685				-0.442157		-0.422522		0.325865
MIMAT0027604	miR-6852-5p	Medium																												-0.383754					-0.366046
MIMAT0027607	miR-6853-3p	Medium			0.887524																									-0.397433
MIMAT0027608	miR-6854-5p	Medium																												-0.314387
MIMAT0027609	miR-6854-3p	Medium								0.575423				-0.995009					0.371943											-0.84146
MIMAT0027611	miR-6855-3p	Medium																								-0.439419
MIMAT0027612	miR-6856-5p	Medium											-0.526385			-0.667143
MIMAT0027613	miR-6856-3p	Medium						-0.603279																									-0.363603
MIMAT0027614	miR-6857-5p	Low																									-0.914065
MIMAT0027615	miR-6857-3p	Low							-0.542156		0.876219
MIMAT0027616	miR-6858-5p	Medium																												-0.712738
MIMAT0027617	miR-6858-3p	Medium											0.39206
MIMAT0027620	miR-6769b-5p	Medium						0.628155																								0.745494
MIMAT0027621	miR-6769b-3p	Medium	0.85231
MIMAT0027622	miR-6860	Medium																								-0.317777
MIMAT0027623	miR-6861-5p	Medium																										0.642074
MIMAT0027624	miR-6861-3p	Low																-0.979202
MIMAT0027625	miR-6862-5p	Medium													-0.92153
MIMAT0027626	miR-6862-3p	Medium																				-0.422251								-0.629663		0.40276
MIMAT0027627	miR-6863	Low					-0.758957
MIMAT0027629	miR-6864-3p	Medium																	-0.325933	-0.512288						0.998784								-0.395179
MIMAT0027631	miR-6865-3p	Medium						-0.769806																-0.962429
MIMAT0027632	miR-6866-5p	Medium											0.778472
MIMAT0027633	miR-6866-3p	Medium																										-0.496482							-0.969077
MIMAT0027634	miR-6867-5p	Medium							-0.414778											-0.438049
MIMAT0027635	miR-6867-3p	Medium																															-0.998295
MIMAT0027636	miR-6868-5p	Medium								0.652273									-0.615025									-0.653242			-0.683932	0.71597
MIMAT0027638	miR-6869-5p	Medium																														0.558629
MIMAT0027639	miR-6869-3p	Medium															-0.99969		0.742423
MIMAT0027640	miR-6870-5p	Medium																									0.979507			-0.988447
MIMAT0027641	miR-6870-3p	Medium			0.503885				-0.325929								-0.999463		-0.304323									-0.38619
MIMAT0027642	miR-6871-5p	Medium																		-0.320242
MIMAT0027643	miR-6871-3p	Medium																												-0.750728	-0.509569
MIMAT0027644	miR-6872-5p	Low																				0.342914			0.438478									-0.654413
MIMAT0027645	miR-6872-3p	Medium																																0.539074
MIMAT0027646	miR-6873-5p	Medium																														0.98197
MIMAT0027647	miR-6873-3p	Medium																0.500892										-0.342		-0.554188		0.380445
MIMAT0027648	miR-6874-5p	Medium															-0.69546						0.520953							-0.474011
MIMAT0027650	miR-6875-5p	Low															-0.758676													-0.344019		-0.316014
MIMAT0027651	miR-6875-3p	Medium								-0.404794	-0.549169																			-0.528004	-0.435395
MIMAT0027654	miR-6877-5p	Low															-0.501702													-0.359399
MIMAT0027655	miR-6877-3p	Medium																	0.609107
MIMAT0027656	miR-6878-5p	Medium													-0.616591								0.588267							-0.437333
MIMAT0027657	miR-6878-3p	Medium					0.327416											0.738741																	0.998683
MIMAT0027660	miR-6880-5p	Medium								-0.936377																								-0.849699
MIMAT0027661	miR-6880-3p	Low												-0.629366																-0.623217
MIMAT0027662	miR-6881-5p	Low													-0.999837				0.390331										-0.999928			0.737515	-0.891379
MIMAT0027663	miR-6881-3p	Medium																						-0.76884
MIMAT0027664	miR-6882-5p	Medium																													-0.326476	0.433734
MIMAT0027665	miR-6882-3p	Medium							-0.426637															-0.325625						-0.337982
MIMAT0027667	miR-6883-3p	Low	0.976762	-0.369363																				-0.377713								0.34934
MIMAT0027669	miR-6884-3p	Low																											0.766471			0.546264
MIMAT0027670	miR-6885-5p	Medium							-0.465835																							0.398115
MIMAT0027671	miR-6885-3p	Medium																										-0.40239		-0.557314
MIMAT0027673	miR-6886-3p	Medium							-0.429821					-0.757517	0.999003
MIMAT0027674	miR-6887-5p	Medium																				-0.359257
MIMAT0027676	miR-6888-5p	Low					0.821343																								-0.814632
MIMAT0027677	miR-6888-3p	Medium														-0.54727										-0.391312				-0.464962
MIMAT0027678	miR-6889-5p	Medium																		-0.776236				-0.815401
MIMAT0027679	miR-6889-3p	Medium			0.999951												-0.99908
MIMAT0027680	miR-6890-5p	Medium									-0.90495					-0.669347																	-0.822929
MIMAT0027682	miR-6891-5p	Low															-0.401079												-0.350677
MIMAT0027684	miR-6892-5p	Medium															-0.431838
MIMAT0027685	miR-6892-3p	Medium																	-0.965476
MIMAT0027688	miR-6894-5p	Medium																0.316937								-0.424885
MIMAT0027689	miR-6894-3p	Medium															-0.61176							-0.33974
MIMAT0027691	miR-6895-3p	Medium						-0.476623
MIMAT0028110	miR-7106-3p	Low														-0.883925											0.60315
MIMAT0028111	miR-7107-5p	Medium					0.992346
MIMAT0028114	miR-7108-3p	Low								0.585359						0.998752																0.741003
MIMAT0028115	miR-7109-5p	Medium		-0.970966																-0.694343							0.432302
MIMAT0028116	miR-7109-3p	Low														-0.540161														-0.877127		0.545236
MIMAT0028118	miR-7110-3p	Medium			0.740108																			-0.546027					-0.4024
MIMAT0028119	miR-7111-5p	Medium	0.97438																0.762737
MIMAT0028120	miR-7111-3p	Medium																																	-0.816784
MIMAT0028123	miR-7113-5p	Medium																												-0.407154
MIMAT0028124	miR-7113-3p	Medium																										0.867456		-0.857018
MIMAT0028125	miR-7114-5p	Low														-0.390116							-0.892496
MIMAT0028212	miR-7151-5p	Medium															-0.618779							-0.591009											-0.71385
MIMAT0028213	miR-7151-3p	Medium													-0.636343						-0.697159		0.849066	-0.783728							-0.464748
MIMAT0028214	miR-7152-5p	Low			0.997105											-0.5304												-0.410667
MIMAT0028215	miR-7152-3p	Medium																												-0.415564
MIMAT0028220	miR-7155-5p	Medium																										-0.301918				0.467067
MIMAT0028221	miR-7155-3p	Medium							-0.304323																					-0.30943		0.415491
MIMAT0028222	miR-7156-5p	Medium																														-0.430648
MIMAT0028223	miR-7156-3p	Medium					0.647822															0.589739					0.728579
MIMAT0028224	miR-7157-5p	Medium																										-0.813714
MIMAT0028232	miR-7161-5p	Low						0.481027		-0.565957
MIMAT0028233	miR-7161-3p	Medium							-0.846468
MIMAT0028230	miR-7160-5p	Medium																			0.716028
MIMAT0028231	miR-7160-3p	Low														0.983257
MIMAT0029782	miR-7641	Medium															-0.440854
MIMAT0030017	miR-7702	Low															0.3546															0.54679		0.389358
MIMAT0030018	miR-7703	Medium						0.33824																								0.45935
MIMAT0030020	miR-7705	Low												-0.341699												-0.325684				-0.315549
MIMAT0030021	miR-7706	Low																														-0.348577	-0.373279
MIMAT0030414	miR-4433b-3p	Low																			-0.369402		-0.682747
MIMAT0030416	miR-1273h-3p	Medium							-0.588618																							0.33693	-0.392396
MIMAT0030417	miR-6516-5p	Medium			0.441254																									-0.331027
MIMAT0030418	miR-6516-3p	Low																												-0.437537
MIMAT0030419	miR-7844-5p	Low												-0.748086
MIMAT0030420	miR-7845-5p	Medium															-0.707861													-0.331688
MIMAT0030421	miR-7846-3p	Low																																	-0.956768
MIMAT0030423	miR-7848-3p	Medium	0.534865												-0.993798		-0.834575													-0.951007
MIMAT0030424	miR-7849-3p	Low					-0.534956
MIMAT0030425	miR-7850-5p	Medium															-0.461008											-0.500105					-0.318373
MIMAT0030426	miR-7851-3p	Medium															-0.9681											-0.897556				0.541244
MIMAT0030428	miR-7853-5p	Medium						-0.864741
MIMAT0030430	miR-7855-5p	Medium																														-0.997755
MIMAT0031175	miR-548ba	Low		0.674888																			0.562382						-0.520986
MIMAT0031177	miR-7974	Medium																												-0.407728
MIMAT0031179	miR-7976	Medium															-0.442102							-0.386353								0.401973	-0.314747
MIMAT0031180	miR-7977	Medium														-0.726316								-0.965993						0.999998
MIMAT0031181	miR-7978	Medium				0.957003								0.483813																					-0.546032
MIMAT0030986	miR-8059	Medium				-0.716256
MIMAT0030991	miR-8064	Medium																																-0.951136
MIMAT0030993	miR-8066	Low																																-0.990544
MIMAT0030999	miR-8072	Medium												-0.398511			-0.466658												-0.368539
MIMAT0031002	miR-8075	Medium																				0.8429
MIMAT0031012	miR-8085	Medium								1																									0.998538

## Sheet: Table S7
Table S7. Correlation analysis between IL6ST gene expression and expression levels of miRNAs related to IL6ST (mirDIP tool) in all TCGA tumors. In table are reported the miRNAs showing Pearson’s r ≥ 0.3 or ≤ -0.3 , p ≤ 0.05. The mirDIP Score class for each miRNA is listed
MIMAT (human)	miRNA ID (human)	mirDIP Score class for IL6ST	LAML	ACC	CHOL	BLCA	BRCA	CESC	COAD	UCEC	ESCA	GBM	HNSC	KICH	KIRC	KIRP	DLBC	LIHC	LGG	LUAD	LUSC	SKCM	MESO	UVM	OV	PAAD	PCPG	PRAD	READ	SARC	STAD	TGCT	THYM	THCA	UCS
MIMAT0000062	let-7a-5p	High	-0.342781										0.356297										-0.338289	-0.337871
MIMAT0004481	let-7a-3p	Medium							-0.328778																			-0.344125		-0.303441
MIMAT0010195	let-7a-2-3p	Medium	-0.312177														-0.373909				0.310192	0.33953
MIMAT0000063	let-7b-5p	High					0.341563						0.363934				-0.323465						-0.31524
MIMAT0004482	let-7b-3p	Medium					0.357866						0.300803				-0.401376
MIMAT0000064	let-7c-5p	High							0.340012																						0.371347
MIMAT0026472	let-7c-3p	Medium															-0.376489
MIMAT0000065	let-7d-5p	High			-0.428775				-0.338094		-0.33979																		-0.391872		-0.369757
MIMAT0004484	let-7d-3p	Medium															-0.338286
MIMAT0004485	let-7e-3p	Medium															-0.471424
MIMAT0000067	let-7f-5p	High			-0.417445
MIMAT0004486	let-7f-1-3p	Medium							-0.324184								-0.343387																-0.519572
MIMAT0004487	let-7f-2-3p	Medium																															-0.379053
MIMAT0000068	miR-15a-5p	High			-0.439896		-0.3225						-0.405704											0.358231				-0.326101			-0.322193		-0.428656
MIMAT0004488	miR-15a-3p	Medium			-0.638476												-0.410275																-0.483608
MIMAT0000069	miR-16-5p	Very High							-0.385784		-0.308045																				-0.369427		-0.380305
MIMAT0004489	miR-16-1-3p	High																															-0.471696
MIMAT0000070	miR-17-5p	Very High			-0.359878		-0.378506		-0.422363		-0.339064		-0.385459								-0.364535							-0.365399			-0.502057		-0.473848
MIMAT0000071	miR-17-3p	High			-0.48686		-0.451578				-0.378681																				-0.41897		-0.477505
MIMAT0000072	miR-18a-5p	High					-0.488145		-0.497588		-0.335764		-0.375787							-0.389683	-0.397704			0.319853				-0.310099			-0.517962		-0.53926
MIMAT0002891	miR-18a-3p	Medium																													-0.461595		-0.46841
MIMAT0004490	miR-19a-5p	Medium																											-0.542548		-0.324521
MIMAT0000073	miR-19a-3p	Very High					-0.38315		-0.401006				-0.485901			-0.305905				-0.353541	-0.311927					-0.350638		-0.325013			-0.481657		-0.501548
MIMAT0004491	miR-19b-1-5p	Medium			-0.354241		-0.318647																								-0.432891		-0.422975
MIMAT0000074	miR-19b-3p	Very High				-0.304975	-0.302759		-0.40148				-0.475985			-0.348511					-0.330225					-0.361139		-0.409391			-0.486416		-0.480377
MIMAT0004492	miR-19b-2-5p	Medium							-0.999634																			-0.342118		-0.919408
MIMAT0000075	miR-20a-5p	Very High				-0.32735	-0.45626		-0.340085				-0.431722								-0.321756							-0.376398			-0.41998		-0.452645
MIMAT0004493	miR-20a-3p	Medium							-0.365737		-0.32012		-0.306333															-0.356031			-0.435497		-0.336252
MIMAT0000076	miR-21-5p	Very High	0.315973														0.425837							0.315688
MIMAT0004494	miR-21-3p	High																						0.309016
MIMAT0004495	miR-22-5p	Medium	0.436374		-0.39967				-0.305528					-0.370809	-0.348177					-0.426001
MIMAT0000077	miR-22-3p	Very High	0.446814																							0.306914			0.356456				0.395988
MIMAT0000078	miR-23a-3p	High															-0.313566
MIMAT0000079	miR-24-1-5p	High															-0.459836												-0.339236
MIMAT0000080	miR-24-3p	High									-0.361624																	0.341933
MIMAT0004497	miR-24-2-5p	High							-0.45415				-0.326061							-0.316768	-0.310024
MIMAT0004498	miR-25-5p	Medium																															-0.46174
MIMAT0000081	miR-25-3p	Very High			-0.365138		-0.317911									-0.313855	-0.352754											-0.32142			-0.417459		-0.465624		-0.307108
MIMAT0000082	miR-26a-5p	High											0.315177
MIMAT0004499	miR-26a-1-3p	Medium															-0.501345
MIMAT0000083	miR-26b-5p	Very High		-0.323464					-0.405646																					-0.304793
MIMAT0004500	miR-26b-3p	Medium	0.34124	-0.313351					-0.373632								-0.40468
MIMAT0000084	miR-27a-3p	Very High							-0.361248
MIMAT0000085	miR-28-5p	High			-0.478515																			-0.334724
MIMAT0004502	miR-28-3p	High															-0.347866
MIMAT0004503	miR-29a-5p	Medium							-0.468272															0.387193
MIMAT0000086	miR-29a-3p	Medium		0.300809					-0.393979
MIMAT0000087	miR-30a-5p	Medium									0.38145																				0.304733
MIMAT0000088	miR-30a-3p	High					0.309008		0.331735		0.322378						-0.471706			0.31889
MIMAT0000090	miR-32-5p	Very High			-0.488542				-0.457288																	-0.337808			-0.312985		-0.407017		-0.427374		-0.377352
MIMAT0004505	miR-32-3p	Medium							-0.532754												-0.343783								-0.362064		-0.456787		-0.347159
MIMAT0000091	miR-33a-5p	High							-0.449615		-0.398037						-0.498362												-0.313884		-0.402819		-0.497104
MIMAT0004506	miR-33a-3p	Medium															-0.359823														-0.395002		-0.337899
MIMAT0004507	miR-92a-1-5p	High																													-0.327231		-0.528388
MIMAT0000092	miR-92a-3p	High							-0.385685		-0.368539													-0.309009					-0.356283		-0.491046		-0.43522
MIMAT0004508	miR-92a-2-5p	Medium											-0.442489
MIMAT0000093	miR-93-5p	Very High			-0.421494	-0.373693	-0.444329		-0.322848				-0.357306								-0.317444							-0.397057			-0.384499		-0.476112
MIMAT0004509	miR-93-3p	Very High				-0.330525			-0.364365																						-0.430965		-0.461836
MIMAT0026473	miR-95-5p	Medium																								-0.376492					-0.354451
MIMAT0000094	miR-95-3p	Medium	0.326288						-0.36398																				-0.387401		-0.339114
MIMAT0000095	miR-96-5p	High				-0.312507			-0.448349		-0.483725		-0.339874							-0.339424	-0.448984					-0.303818		-0.375957	-0.454592		-0.484853
MIMAT0000096	miR-98-5p	High			-0.334039
MIMAT0022842	miR-98-3p	Medium									-0.332147													0.375925
MIMAT0000097	miR-99a-5p	Medium																													0.37105
MIMAT0004511	miR-99a-3p	Medium															-0.409238
MIMAT0000098	miR-100-5p	Medium															-0.313552				0.41959	0.356034				0.328391					0.421119
MIMAT0004512	miR-100-3p	Medium																							0.770431
MIMAT0004513	miR-101-5p	Medium		0.307611
MIMAT0000099	miR-101-3p	Medium																			0.303519
MIMAT0004514	miR-29b-1-5p	High							-0.336736
MIMAT0000100	miR-29b-3p	Medium	0.354968						-0.419206				-0.314396											0.397388				-0.313878
MIMAT0004515	miR-29b-2-5p	High				-0.304555	0.312984
MIMAT0009196	miR-103a-2-5p	Medium				-0.303164							-0.482014								-0.324059										-0.366239
MIMAT0000101	miR-103a-3p	High			-0.434011
MIMAT0000102	miR-105-5p	Medium															-0.561312
MIMAT0004516	miR-105-3p	Medium														-0.961944															-0.345897			-0.99969
MIMAT0000103	miR-106a-5p	Very High															0.352156				-0.329101							-0.305137					-0.488204
MIMAT0004517	miR-106a-3p	Medium																											-0.897168				-0.458448
MIMAT0000104	miR-107	High			-0.50595																										-0.331099
MIMAT0004518	miR-16-2-3p	Medium							-0.380619												-0.305052								-0.345051		-0.36389		-0.470263
MIMAT0000222	miR-192-5p	Very High							-0.385929															-0.311184							-0.321959
MIMAT0004543	miR-192-3p	High							-0.323391																						-0.308535
MIMAT0000226	miR-196a-5p	High							-0.310577
MIMAT0022691	miR-197-5p	Medium												-0.747917													0.328276	-0.336529
MIMAT0000227	miR-197-3p	Medium	0.383746								-0.320522													-0.37645							-0.415456				-0.326721
MIMAT0000231	miR-199a-5p	Medium	0.303132																						0.300589
MIMAT0000232	miR-199a-3p	High															-0.312104
MIMAT0026474	miR-208a-5p	Low																	-0.811812
MIMAT0000241	miR-208a-3p	High																																0.817525
MIMAT0000242	miR-129-5p	Very High															-0.543305
MIMAT0004548	miR-129-1-3p	Medium	-0.409254											-0.322336							-0.325492
MIMAT0004549	miR-148a-5p	Medium											0.325599																				-0.344393
MIMAT0000244	miR-30c-5p	High							-0.31533				-0.404307															-0.413466
MIMAT0004550	miR-30c-2-3p	Medium							0.413086																						0.309414
MIMAT0000245	miR-30d-5p	High																															0.347925
MIMAT0000250	miR-139-5p	Medium	0.430879																												0.406158
MIMAT0004552	miR-139-3p	Medium							0.336502				0.404405															0.335533			0.361112
MIMAT0000252	miR-7-5p	High							-0.304807																						-0.403983		-0.462062
MIMAT0004553	miR-7-1-3p	High			-0.474835																										-0.399961		-0.511828
MIMAT0004554	miR-7-2-3p	High																														-0.307248
MIMAT0004555	miR-10a-3p	Medium	-0.300746						-0.341722								-0.452208
MIMAT0004556	miR-10b-3p	Medium											0.301786
MIMAT0000255	miR-34a-5p	High							-0.31704				-0.309436
MIMAT0000256	miR-181a-5p	High																															-0.42827
MIMAT0004558	miR-181a-2-3p	Medium															-0.436235
MIMAT0000257	miR-181b-5p	High					-0.343514																										-0.43357
MIMAT0022692	miR-181b-3p	Medium															-0.501734				0.366833												-0.481077
MIMAT0004559	miR-181c-3p	Medium															-0.340689
MIMAT0000259	miR-182-5p	High									-0.39987										-0.301797							-0.337966	-0.327808		-0.432213
MIMAT0000260	miR-182-3p	High																												-0.821285
MIMAT0000261	miR-183-5p	High									-0.470304																		-0.332769		-0.467311
MIMAT0004560	miR-183-3p	Medium		-0.371219							-0.393371																				-0.320183
MIMAT0004561	miR-187-5p	Medium								-0.301345														-0.318105					-0.935902	-0.677599
MIMAT0004562	miR-196a-3p	Medium							0.641312									-0.772147					-0.647718
MIMAT0004563	miR-199b-3p	High															-0.314009
MIMAT0000264	miR-203a-3p	Very High							-0.333852
MIMAT0000265	miR-204-5p	Very High															-0.400845
MIMAT0000266	miR-205-5p	Very High																									0.314657
MIMAT0009197	miR-205-3p	High																				-0.30287
MIMAT0026475	miR-210-5p	Low															-0.323076
MIMAT0000267	miR-210-3p	Medium									-0.386714						-0.39953														-0.420147
MIMAT0000268	miR-211-5p	Very High			-0.590574																	-0.340389									-0.30073
MIMAT0022694	miR-211-3p	Medium														0.98446			0.999374			-0.364608		-0.365109
MIMAT0000269	miR-212-3p	High				0.301965							0.343928
MIMAT0000270	miR-181a-3p	Medium															-0.389191				0.305155												-0.456179
MIMAT0000272	miR-215-5p	Very High			-0.330527
MIMAT0026476	miR-215-3p	Medium															-0.741015																		-0.806352
MIMAT0000273	miR-216a-5p	Medium	-0.598913																																0.316096
MIMAT0022844	miR-216a-3p	Medium																										-0.310788
MIMAT0000274	miR-217	High	-0.352481								0.339972						-0.381689
MIMAT0004565	miR-218-1-3p	Medium			-0.385061
MIMAT0004566	miR-218-2-3p	Medium																								-0.517392		0.699799
MIMAT0000276	miR-219a-5p	Medium									-0.315296		-0.388323			-0.370224					-0.391631										-0.449936			-0.307508
MIMAT0004567	miR-219a-1-3p	High			-0.352395																										-0.309107
MIMAT0004568	miR-221-5p	Medium			-0.521898								0.47227											-0.377477					-0.352994		-0.308334
MIMAT0000278	miR-221-3p	High							-0.431172															-0.327463							-0.327826
MIMAT0000279	miR-222-3p	Medium							-0.470554																				-0.325676		-0.417246
MIMAT0004570	miR-223-5p	Medium															0.33312
MIMAT0000280	miR-223-3p	Very High															0.476788						0.308489
MIMAT0004571	miR-200b-5p	Medium							-0.344228												-0.301872									-0.405868	-0.420013
MIMAT0000318	miR-200b-3p	Very High																			-0.305112										-0.379568
MIMAT0000414	let-7g-5p	High							-0.338637															-0.407739									-0.303463
MIMAT0004584	let-7g-3p	Medium							-0.334441								-0.510848					0.333153
MIMAT0000415	let-7i-5p	High			-0.514536
MIMAT0004585	let-7i-3p	Medium			-0.377651												-0.335978
MIMAT0000417	miR-15b-5p	High			-0.39113						-0.329887										-0.369335										-0.420462		-0.479371
MIMAT0004586	miR-15b-3p	Medium							-0.3664																						-0.377272		-0.505702
MIMAT0004587	miR-23b-5p	Medium																											-0.323715
MIMAT0000418	miR-23b-3p	Very High															-0.634788
MIMAT0000419	miR-27b-3p	Very High															-0.516292
MIMAT0000420	miR-30b-5p	High							-0.439764				-0.334614		-0.317612	-0.303014												-0.340455	-0.424925		-0.329817
MIMAT0004589	miR-30b-3p	High		0.345591													-0.322867														-0.327413
MIMAT0000421	miR-122-5p	Very High																																	-0.520899
MIMAT0004590	miR-122-3p	Medium																				-0.823426
MIMAT0004591	miR-124-5p	High											-0.724769									-0.572919				-0.660364				-0.463035
MIMAT0000422	miR-124-3p	High												-0.653608												-0.479114			0.478345	-0.317718
MIMAT0000423	miR-125b-5p	High															-0.374804														0.309949
MIMAT0026477	miR-128-1-5p	Low															-0.360115																-0.308126
MIMAT0000424	miR-128-3p	High			-0.35434				-0.319487		-0.359911						-0.382589														-0.352957		-0.446934
MIMAT0004593	miR-130a-5p	High							-0.303454								-0.363728												-0.302519
MIMAT0000425	miR-130a-3p	Very High	0.310245	-0.344572									-0.336017
MIMAT0004594	miR-132-5p	Medium			-0.364458												-0.374421
MIMAT0000426	miR-132-3p	Medium							0.329654																				0.37194
MIMAT0026478	miR-133a-5p	Medium																											-0.330029
MIMAT0004595	miR-135a-3p	Medium			-0.569117									0.93036
MIMAT0000430	miR-138-5p	Medium		0.319556			-0.304563
MIMAT0004598	miR-141-5p	High																													-0.379721
MIMAT0000432	miR-141-3p	Medium				-0.349795			-0.436074				-0.36629								-0.468919							-0.381601			-0.488774
MIMAT0000433	miR-142-5p	Very High																															-0.478312
MIMAT0000434	miR-142-3p	Very High															-0.343193							0.337718									-0.459682
MIMAT0004599	miR-143-5p	Medium															-0.324397
MIMAT0000435	miR-143-3p	Very High				0.369487			0.302525				0.46614				-0.335801											0.343803			0.3034
MIMAT0000438	miR-152-3p	Very High											0.432376				-0.492566											0.473797	0.305104				0.318841
MIMAT0000440	miR-191-5p	Medium			-0.448431	-0.332818			-0.467135																			-0.327675	-0.304521		-0.424839	-0.31513	-0.309383
MIMAT0001618	miR-191-3p	Medium															-0.481898
MIMAT0000443	miR-125a-5p	High											-0.323655
MIMAT0004602	miR-125a-3p	High															-0.322982
MIMAT0004603	miR-125b-2-3p	Medium							0.311043								-0.40791									0.334177					0.3529
MIMAT0000444	miR-126-5p	Medium	0.391849		-0.337271																			0.356271
MIMAT0000445	miR-126-3p	High	0.413266
MIMAT0004604	miR-127-5p	Medium															-0.477615
MIMAT0000446	miR-127-3p	High															-0.39191											0.349085
MIMAT0004605	miR-129-2-3p	High															-0.456003
MIMAT0000447	miR-134-5p	High															-0.412618
MIMAT0026481	miR-134-3p	Low	-0.341858														-0.364082
MIMAT0000448	miR-136-5p	Very High															-0.363716
MIMAT0004607	miR-138-1-3p	Medium					-0.310165				-0.380087																	-0.324678	-0.452365
MIMAT0000449	miR-146a-5p	High																						-0.380901
MIMAT0004608	miR-146a-3p	High							-0.302872																					-0.32527
MIMAT0000450	miR-149-5p	High															-0.315984
MIMAT0004609	miR-149-3p	High																											-0.487828
MIMAT0000451	miR-150-5p	High	0.38603																		0.304654
MIMAT0004610	miR-150-3p	Medium	0.441503											0.366321							0.364874												-0.349617
MIMAT0000453	miR-154-3p	Medium	-0.340595
MIMAT0000455	miR-185-5p	Medium	0.413227				-0.342204										0.363062																-0.404208
MIMAT0004611	miR-185-3p	Medium			-0.342681						-0.390275		0.374326
MIMAT0000456	miR-186-5p	High			-0.439949				-0.300918																						-0.335227				-0.372275
MIMAT0004612	miR-186-3p	High												-0.438935
MIMAT0000457	miR-188-5p	Very High		0.319915	-0.35587		-0.303199		-0.498207																				-0.398315		-0.353265
MIMAT0004613	miR-188-3p	Medium															-0.36094
MIMAT0026482	miR-190a-3p	High																																	-0.343428
MIMAT0004614	miR-193a-5p	High	0.309471
MIMAT0000459	miR-193a-3p	Medium							-0.364534
MIMAT0000460	miR-194-5p	Very High							-0.310462
MIMAT0000461	miR-195-5p	Very High																																	0.311178
MIMAT0004615	miR-195-3p	Medium												0.325237																	0.408804				0.372513
MIMAT0000510	miR-320a	Very High																						-0.426343				-0.317173
MIMAT0004657	miR-200c-5p	Medium																				-0.343986								-0.333968
MIMAT0000617	miR-200c-3p	Very High																			-0.304003										-0.453772
MIMAT0000646	miR-155-5p	Very High																															-0.355183
MIMAT0004658	miR-155-3p	Medium																															-0.305588
MIMAT0031095	miR-128-2-5p	Low																															-0.314892
MIMAT0004671	miR-194-3p	Medium																						-0.30371
MIMAT0000680	miR-106b-5p	Very High			-0.584734		-0.42928		-0.520282						-0.334889					-0.319786	-0.394544			0.303555					-0.377946		-0.505462		-0.514624		-0.333775
MIMAT0004672	miR-106b-3p	Medium			-0.433508												-0.552326														-0.415708		-0.456058
MIMAT0004673	miR-29c-5p	Medium					0.31401										-0.38813
MIMAT0004674	miR-30c-1-3p	Medium															-0.506411
MIMAT0001620	miR-200a-5p	Medium																													-0.341441
MIMAT0000682	miR-200a-3p	Medium				-0.312265			-0.350596				-0.343646								-0.369103			0.327782							-0.395855
MIMAT0000683	miR-302a-5p	Medium																					0.629774											0.574294
MIMAT0004675	miR-219a-2-3p	Medium				-0.405271					-0.673226					-0.411769					-0.314306
MIMAT0000685	miR-34b-5p	Medium																									-0.319484
MIMAT0002890	miR-299-5p	High	-0.398074
MIMAT0000687	miR-299-3p	High													-0.355673		-0.374383												-0.312675
MIMAT0022696	miR-301a-5p	Medium							-0.414749								-0.362689														-0.306197		-0.318515
MIMAT0000688	miR-301a-3p	Very High							-0.317545				-0.360505																		-0.354148
MIMAT0000689	miR-99b-5p	Medium															-0.491993																0.308454
MIMAT0004678	miR-99b-3p	Medium															-0.431394
MIMAT0000690	miR-296-5p	Medium															-0.366867
MIMAT0004679	miR-296-3p	Very High												-0.340783			-0.440247
MIMAT0004680	miR-130b-5p	High			-0.344424				-0.382974		-0.317691																				-0.411595		-0.441752
MIMAT0000691	miR-130b-3p	Very High			-0.412106				-0.507192		-0.352243										-0.392238								-0.399161		-0.482494		-0.522688
MIMAT0000692	miR-30e-5p	Medium																						0.319363
MIMAT0000693	miR-30e-3p	High															-0.544407
MIMAT0004681	miR-26a-2-3p	Medium							-0.346265
MIMAT0000703	miR-361-5p	High																													-0.304528
MIMAT0004682	miR-361-3p	Medium			-0.432941
MIMAT0000705	miR-362-5p	Medium					-0.389738		-0.42129				-0.514156				0.351476		-0.313739		-0.333521							-0.361461	-0.469984		-0.332363
MIMAT0004683	miR-362-3p	Very High					-0.375908		-0.365866
MIMAT0003385	miR-363-5p	Medium															-0.559187			-0.359397						-0.598318							-0.385029
MIMAT0000707	miR-363-3p	Very High	0.305768														0.408269																-0.47996
MIMAT0009199	miR-365a-5p	Medium												-0.392702																			-0.430817
MIMAT0000710	miR-365a-3p	Medium																												-0.359235
MIMAT0022834	miR-365b-3p	Medium																												-0.35957
MIMAT0000716	miR-302c-5p	Medium																													-0.859654
MIMAT0000717	miR-302c-3p	High																					0.997692				0.747648			0.999847
MIMAT0000719	miR-367-3p	High																													-0.690859
MIMAT0022861	miR-376c-5p	Medium							-0.405722
MIMAT0001621	miR-369-5p	Medium	-0.364708
MIMAT0026483	miR-370-5p	Medium	-0.400143	-0.300769
MIMAT0000722	miR-370-3p	High															-0.3766
MIMAT0004687	miR-371a-5p	High																	-0.834561						-0.429378
MIMAT0000723	miR-371a-3p	Medium						-0.571277											-0.471674		0.524757
MIMAT0000724	miR-372-3p	High																																	-0.432724
MIMAT0000725	miR-373-5p	High																			0.970468
MIMAT0000726	miR-373-3p	High																						-0.667642							-0.326956
MIMAT0000727	miR-374a-5p	High			-0.420566				-0.303416								0.347649																		-0.304687
MIMAT0000728	miR-375	Medium															-0.384247
MIMAT0003386	miR-376a-5p	Medium	-0.387486	-0.368848					-0.306509
MIMAT0000729	miR-376a-3p	High												-0.405284
MIMAT0004689	miR-377-5p	Medium	-0.393504												-0.32989		-0.434028
MIMAT0000730	miR-377-3p	High															-0.35317
MIMAT0000731	miR-378a-5p	High															-0.306466																-0.390216
MIMAT0000732	miR-378a-3p	Very High																															-0.449974
MIMAT0000733	miR-379-5p	Very High															-0.443492											0.350014
MIMAT0004690	miR-379-3p	Medium	-0.699837																					-0.551697
MIMAT0000734	miR-380-5p	Medium	-0.549541
MIMAT0000735	miR-380-3p	Medium	-0.463901
MIMAT0022862	miR-381-5p	Medium	-0.361359
MIMAT0000736	miR-381-3p	Medium															-0.348536
MIMAT0022697	miR-382-3p	High	-0.347944														-0.330424
MIMAT0000738	miR-383-5p	High													-0.655384
MIMAT0026485	miR-383-3p	Medium																					-0.990911				0.605671	-0.361036
MIMAT0004692	miR-340-5p	Very High			-0.351329												0.408042							0.321522
MIMAT0026486	miR-328-5p	Low												-0.412498
MIMAT0000752	miR-328-3p	Medium															-0.389427
MIMAT0004694	miR-342-5p	High	0.313958																														-0.326521
MIMAT0000753	miR-342-3p	Medium	0.39017																														-0.343958
MIMAT0004695	miR-337-5p	Medium	-0.540009												-0.376711
MIMAT0000754	miR-337-3p	Medium															-0.311707
MIMAT0004696	miR-323a-5p	Medium																-0.477227								-0.409772
MIMAT0000755	miR-323a-3p	High												-0.388859			-0.401207
MIMAT0000756	miR-326	High											0.402503				-0.399546				0.372973					0.311646		0.347696
MIMAT0004697	miR-151a-5p	Medium	0.631084			-0.337233			-0.370692		-0.317606																				-0.451287
MIMAT0000757	miR-151a-3p	High	0.599519								-0.391295		0.366892				-0.386638											0.319617			-0.389823
MIMAT0000758	miR-135b-5p	Very High							-0.406959																	-0.30988			-0.372022		-0.369568
MIMAT0004698	miR-135b-3p	Medium					-0.349812								-0.345712													-0.436139	-0.319533
MIMAT0004699	miR-148b-5p	Medium											-0.336776				0.339078				-0.335981										-0.399863		-0.348585
MIMAT0004700	miR-331-5p	High															-0.390396														-0.301826		-0.458262
MIMAT0000760	miR-331-3p	Medium							-0.319463								-0.53528		0.320317														-0.314623
MIMAT0000761	miR-324-5p	Medium			-0.429883				-0.356365				-0.360537																		-0.349929
MIMAT0000762	miR-324-3p	Medium			-0.384381						-0.342643						-0.430367
MIMAT0004701	miR-338-5p	High	0.362119
MIMAT0000763	miR-338-3p	Medium											-0.347712
MIMAT0000764	miR-339-5p	Medium							-0.477408				-0.404991			-0.45313					-0.355293							-0.33927	-0.315439		-0.327025	-0.309247
MIMAT0004702	miR-339-3p	Medium			-0.370018				-0.320676																						-0.326517
MIMAT0000765	miR-335-5p	High							-0.412378					0.332724																	-0.317268
MIMAT0004703	miR-335-3p	High							-0.353894		-0.316445			0.436118																	-0.370868
MIMAT0000770	miR-133b	Very High			0.36502				0.343074																						0.308093
MIMAT0000772	miR-345-5p	High							-0.490122					-0.353004																	-0.373991
MIMAT0022698	miR-345-3p	Medium																													-0.324597
MIMAT0000773	miR-346	Medium																						0.349063							-0.380144
MIMAT0001080	miR-196b-5p	High																													-0.355859		-0.521853
MIMAT0009201	miR-196b-3p	Medium	-0.318384																				-0.478629			-0.601949					-0.312384
MIMAT0001339	miR-422a	Very High																		-0.793726									0.91991
MIMAT0004748	miR-423-5p	High			-0.359574											-0.369438								-0.309472				-0.448658			-0.320386
MIMAT0001340	miR-423-3p	Medium			-0.336292	-0.302251			-0.386331		-0.32187		-0.30048																		-0.429157
MIMAT0001341	miR-424-5p	High			-0.378259																										-0.305656		-0.377613
MIMAT0004749	miR-424-3p	Medium																															-0.319552
MIMAT0003393	miR-425-5p	High							-0.421897												-0.314285										-0.406261		-0.397886
MIMAT0001343	miR-425-3p	Medium							-0.427046								-0.4084														-0.300853		-0.378264
MIMAT0001412	miR-18b-5p	High							-0.383715																				-0.385881				-0.527661
MIMAT0004751	miR-18b-3p	Medium																															-0.344986
MIMAT0001413	miR-20b-5p	Very High	0.3319														0.431396																-0.458585
MIMAT0004752	miR-20b-3p	Medium																															-0.436771
MIMAT0001532	miR-448	Medium																							-0.951226
MIMAT0001536	miR-429	Very High							-0.413691												-0.366324			-0.428053							-0.43935
MIMAT0001541	miR-449a	High																																	0.323221
MIMAT0001545	miR-450a-5p	Medium											-0.322134																				-0.381353
MIMAT0001625	miR-431-5p	Medium	-0.552208	-0.336932									0.300221
MIMAT0004757	miR-431-3p	Low		-0.336221													-0.319498
MIMAT0026554	miR-433-5p	Low													-0.800469											-0.326445
MIMAT0001627	miR-433-3p	High	-0.589281
MIMAT0026555	miR-329-5p	Medium							-0.442308						-0.715301			-0.321981								-0.367853
MIMAT0001629	miR-329-3p	Very High	-0.421223	-0.31628
MIMAT0001636	miR-452-3p	High							-0.440935																				-0.304491
MIMAT0001638	miR-409-5p	Medium															-0.385487
MIMAT0026557	miR-412-5p	Low	-0.321024														-0.522633
MIMAT0002170	miR-412-3p	Medium							-0.503612						-0.831946											-0.590431			-0.648429
MIMAT0026558	miR-410-5p	Medium																-0.335801
MIMAT0002171	miR-410-3p	High	-0.37819														-0.306612
MIMAT0022923	miR-376b-5p	Medium							-0.409755
MIMAT0004761	miR-483-5p	Medium	0.354613
MIMAT0002174	miR-484	Medium							-0.389509																						-0.340014		-0.43911
MIMAT0004762	miR-486-3p	Medium																								-0.373258
MIMAT0026559	miR-487a-5p	Medium	-0.407391											-0.500423
MIMAT0002178	miR-487a-3p	Medium	-0.438509
MIMAT0002804	miR-488-5p	High											-0.452008
MIMAT0026605	miR-489-5p	Low						0.601804																								-0.486254
MIMAT0002805	miR-489-3p	Medium																											-0.55086
MIMAT0004764	miR-490-5p	Medium																										-0.558016	-0.438209
MIMAT0002806	miR-490-3p	Medium							0.306844																						0.330156
MIMAT0002808	miR-511-5p	Medium																			0.303654					0.318333
MIMAT0026606	miR-511-3p	Low																												-0.30454
MIMAT0002809	miR-146b-5p	High															0.544614													-0.30162
MIMAT0004766	miR-146b-3p	Medium																			0.367203					0.30044
MIMAT0002811	miR-202-3p	High				-0.426781
MIMAT0002812	miR-492	Medium																			-0.332253					-0.825464	0.974533
MIMAT0002813	miR-493-5p	Medium		-0.317645
MIMAT0003161	miR-493-3p	Medium	-0.342146
MIMAT0002814	miR-432-5p	Very High	-0.334337
MIMAT0002815	miR-432-3p	Medium																-0.388876								-0.440461
MIMAT0026607	miR-494-5p	Medium	-0.502969												-0.479914	-0.585662												-0.300163
MIMAT0002816	miR-494-3p	Very High												-0.595833
MIMAT0022924	miR-495-5p	Medium	-0.451236												-0.455356
MIMAT0002818	miR-496	Medium	-0.486239											-0.38837			-0.471347
MIMAT0002819	miR-193b-3p	Medium							-0.305543											-0.31476											-0.352701		-0.337038
MIMAT0002820	miR-497-5p	High															-0.43689																		0.310258
MIMAT0004768	miR-497-3p	Medium																																	0.316969
MIMAT0002821	miR-181d-5p	Very High																																	-0.306161
MIMAT0026608	miR-181d-3p	Low														-0.415488																			-0.805244
MIMAT0002822	miR-512-5p	Medium							-0.513415
MIMAT0002823	miR-512-3p	High													-0.730231												0.343934
MIMAT0002826	miR-515-5p	High																		0.373945
MIMAT0002827	miR-515-3p	High													-0.997558				-0.412394	0.316099
MIMAT0002828	miR-519e-5p	Medium								-0.909456							0.997754		-0.747403
MIMAT0002829	miR-519e-3p	Medium																	-0.975013		0.592223
MIMAT0026609	miR-520f-5p	Medium								-0.912532										0.993505	0.802272
MIMAT0002830	miR-520f-3p	Very High																									0.498709
MIMAT0002833	miR-520a-5p	Medium		0.61739
MIMAT0002834	miR-520a-3p	High							-0.335471																-0.341968
MIMAT0002835	miR-526b-5p	Very High													-0.517857								-0.471577
MIMAT0002837	miR-519b-3p	Medium																			0.339075
MIMAT0002838	miR-525-5p	Medium													-0.895247
MIMAT0002839	miR-525-3p	Medium																									0.513276
MIMAT0002840	miR-523-3p	Medium			-0.766844																				-0.397509
MIMAT0002841	miR-518f-5p	Medium													-0.813622										-0.38055		0.431021
MIMAT0002842	miR-518f-3p	Medium							-0.475638															-0.641525
MIMAT0002844	miR-518b	Medium													-0.673101
MIMAT0002846	miR-520c-3p	Very High							-0.381428
MIMAT0002847	miR-518c-5p	Medium													-0.942783
MIMAT0002848	miR-518c-3p	Medium																								-0.386428
MIMAT0002849	miR-524-5p	High							-0.477071
MIMAT0002850	miR-524-3p	Medium																						-0.987566
MIMAT0002851	miR-517-5p	Medium																			0.374609						0.37501
MIMAT0002852	miR-517a-3p	Medium							-0.304956						-0.934909														-0.442063
MIMAT0002853	miR-519d-3p	Very High																					-0.960774
MIMAT0002855	miR-520d-5p	High																		0.799278								-0.971586
MIMAT0002856	miR-520d-3p	High																						-0.745019
MIMAT0002857	miR-517b-3p	Medium							-0.304956						-0.934909														-0.442063
MIMAT0026611	miR-520g-5p	Medium																		0.61287	0.512775
MIMAT0002858	miR-520g-3p	Medium													-0.878851
MIMAT0002859	miR-516b-5p	Very High													-0.810339											-0.337548
MIMAT0005450	miR-518e-5p	Medium																														-0.887155
MIMAT0005457	miR-518a-5p	Medium							-0.395991
MIMAT0002863	miR-518a-3p	Medium							-0.545289
MIMAT0002864	miR-518d-3p	Medium																		0.719891	0.872277														0.99806
MIMAT0002866	miR-517c-3p	Medium															-0.659456				0.429956
MIMAT0002868	miR-522-3p	Very High									0.387579
MIMAT0002862	miR-527	Medium							-0.377762
MIMAT0002870	miR-499a-5p	High	-0.335136		-0.441419																				0.439835
MIMAT0004772	miR-499a-3p	Medium												-0.378627															-0.323925		-0.366916
MIMAT0004773	miR-500a-5p	High					-0.382472		-0.36861				-0.414156																-0.314234		-0.354336
MIMAT0002871	miR-500a-3p	Medium	0.356362				-0.345113						-0.407533																-0.305672		-0.3207
MIMAT0002872	miR-501-5p	High			-0.355011		-0.412462		-0.334576				-0.303747																		-0.31109
MIMAT0004774	miR-501-3p	Medium	0.364823										-0.335151																		-0.341177
MIMAT0002873	miR-502-5p	High					-0.324909						-0.416934				0.30115											-0.333363
MIMAT0004775	miR-502-3p	Medium							-0.324519
MIMAT0031074	miR-450a-2-3p	Medium																			-0.316834			-0.595782
MIMAT0002874	miR-503-5p	High															0.347319							0.32768
MIMAT0002875	miR-504-5p	High	-0.37686																										-0.38009
MIMAT0026612	miR-504-3p	Medium									-0.609187									-0.301403
MIMAT0004776	miR-505-5p	Medium	0.391633						-0.322393				-0.325549
MIMAT0002876	miR-505-3p	Very High	0.332836						-0.448901								-0.388051														-0.339702
MIMAT0002877	miR-513a-5p	Very High	0.925261	0.34895							-0.496898																				-0.423501	-0.303599
MIMAT0004777	miR-513a-3p	Very High																			-0.337122						-0.80448					-0.321451
MIMAT0022701	miR-506-5p	Medium																									-0.823367					-0.521385
MIMAT0002878	miR-506-3p	Medium									-0.317727															-0.330703
MIMAT0004778	miR-508-5p	High			-0.921674																										-0.367078
MIMAT0002880	miR-508-3p	High			-0.397645
MIMAT0004779	miR-509-5p	Very High																								-0.922002	-0.37275					-0.342956
MIMAT0002882	miR-510-5p	Medium																									-0.978989					-0.4699
MIMAT0026613	miR-510-3p	Medium																										-0.997421				-0.372729		-0.356095
MIMAT0022702	miR-514a-5p	High	0.88147								-0.420836
MIMAT0002888	miR-532-5p	Very High	0.351257																					0.391771
MIMAT0004780	miR-532-3p	Medium							-0.412682																				-0.347325		-0.352867
MIMAT0003150	miR-455-5p	High					-0.35254
MIMAT0004784	miR-455-3p	Medium									-0.366697						-0.359036														-0.362739
MIMAT0022705	miR-539-3p	High	-0.422119											-0.603148										0.541823
MIMAT0003164	miR-544a	Medium																													-0.800473		-0.571996	-0.899405
MIMAT0004785	miR-545-5p	Medium							-0.335618																								-0.305185
MIMAT0003165	miR-545-3p	Medium											-0.309476													-0.362427			-0.461147				-0.431628
MIMAT0022928	miR-376a-2-5p	Medium	-0.38494						-0.321282						-0.446224	-0.363988
MIMAT0026614	miR-487b-5p	Low																								-0.355544					-0.351477
MIMAT0003180	miR-487b-3p	Medium															-0.336585
MIMAT0003214	miR-551a	Medium																										-0.309237							-0.30113
MIMAT0026615	miR-552-5p	Medium															-0.691047							-0.555615					-0.353412		-0.313944
MIMAT0003215	miR-552-3p	Medium												-0.499537								-0.413712		-0.627298
MIMAT0003220	miR-556-5p	High	0.473322
MIMAT0004793	miR-556-3p	Medium							-0.331634																				-0.451217		-0.428984				-0.329109
MIMAT0003223	miR-559	High					-0.477309											-0.976914
MIMAT0003225	miR-561-3p	High							-0.581523				-0.450603									-0.399252
MIMAT0003228	miR-564	Medium	0.998874												0.756682														-0.787151
MIMAT0004794	miR-551b-5p	Medium					-0.567013																				-0.828868								0.728296
MIMAT0022707	miR-570-5p	Medium																													-0.318582	-0.442696
MIMAT0003235	miR-570-3p	Medium							-0.31689												-0.321557									-0.311471					-0.312963
MIMAT0003237	miR-572	Medium																				-0.346858									-0.434908
MIMAT0003238	miR-573	Very High																								-0.368611
MIMAT0004795	miR-574-5p	Very High													0.998881							-0.52684		-0.999976
MIMAT0003239	miR-574-3p	Medium	0.306279																					-0.356519									0.474297
MIMAT0003241	miR-576-5p	High							-0.300368				-0.33147																-0.322371		-0.401736		-0.382913		-0.383794
MIMAT0003242	miR-577	Very High					-0.315854		-0.327892																						-0.411237
MIMAT0003243	miR-578	High														-0.477781							-0.584802
MIMAT0026616	miR-579-5p	Medium															-0.372955																-0.446243
MIMAT0003244	miR-579-3p	Very High												-0.589592
MIMAT0026617	miR-580-5p	Medium									-0.355131																		-0.469501
MIMAT0003245	miR-580-3p	High																													-0.333536		-0.442365
MIMAT0003246	miR-581	High			-0.498359												-0.3178
MIMAT0003247	miR-582-5p	High																															0.365424
MIMAT0004797	miR-582-3p	Medium																															0.382
MIMAT0022708	miR-584-3p	Medium								-0.322775																		-0.313276
MIMAT0026618	miR-585-5p	Medium																											-0.363306
MIMAT0004798	miR-548b-5p	High	0.8152								-0.457972												-0.908436
MIMAT0003255	miR-588	Medium											-0.670778
MIMAT0004799	miR-589-5p	High															-0.319124																-0.374532
MIMAT0003256	miR-589-3p	Medium																													-0.320607
MIMAT0004800	miR-550a-5p	Medium																													-0.38055		-0.305593
MIMAT0003257	miR-550a-3p	Medium							-0.366704																						-0.406243
MIMAT0003258	miR-590-5p	Very High			-0.407672				-0.540692		-0.331063						-0.316929			-0.376789				0.38416					-0.302062		-0.450323		-0.373832
MIMAT0004801	miR-590-3p	Very High							-0.408413																				-0.321334		-0.392858		-0.410906		-0.374265
MIMAT0003260	miR-592	Very High			-0.424718				-0.32671								-0.307532							0.420475							-0.378632
MIMAT0026620	miR-598-5p	Low		0.398985																			0.529764	-0.331438		-0.666883
MIMAT0003266	miR-598-3p	Medium															-0.320752
MIMAT0003267	miR-599	Medium																					-0.92472
MIMAT0004803	miR-548a-5p	High																												-0.633415
MIMAT0003270	miR-602	Medium					0.845382															-0.667339
MIMAT0003271	miR-603	High																								-0.970887
MIMAT0003272	miR-604	Medium																		0.999456
MIMAT0003273	miR-605-5p	High	0.454207
MIMAT0026621	miR-605-3p	Medium																																-0.680719
MIMAT0003275	miR-607	Very High																													-0.308593
MIMAT0003277	miR-609	Medium											0.9914														-0.981475
MIMAT0003278	miR-610	Medium																																	-0.999875
MIMAT0003279	miR-611	Medium																		0.906032					-0.631024
MIMAT0003280	miR-612	Very High												-0.998314												0.999981					-0.487552
MIMAT0004804	miR-615-5p	Medium		-0.582926		0.306576											-0.9997				-0.325625		-0.692811									-0.395662
MIMAT0003283	miR-615-3p	Medium																													-0.341061
MIMAT0003284	miR-616-5p	High															-0.342721														-0.335359		-0.341039
MIMAT0003287	miR-618	Medium			-0.568935																										-0.300881
MIMAT0003291	miR-622	Very High																								-0.626896
MIMAT0003293	miR-624-5p	Medium																													-0.308023		-0.441869
MIMAT0004807	miR-624-3p	Medium	0.317868																							-0.541957				-0.422783
MIMAT0003294	miR-625-5p	Medium			-0.329743				-0.36462																						-0.346293		-0.396708
MIMAT0004808	miR-625-3p	Medium																															-0.395419
MIMAT0003296	miR-627-5p	Medium							-0.448115												-0.36658								-0.41371				-0.351318
MIMAT0026623	miR-627-3p	Medium			-0.556033
MIMAT0004809	miR-628-5p	Very High	0.323129														-0.439658
MIMAT0004810	miR-629-5p	Medium			-0.383566						-0.304238																				-0.30911		-0.443753
MIMAT0003298	miR-629-3p	High															-0.485187														-0.311341		-0.41673
MIMAT0003301	miR-33b-5p	High			-0.365139				-0.353839								-0.367159						-0.391849								-0.318556		-0.409616
MIMAT0003302	miR-632	Medium															-0.545178						-0.466114
MIMAT0003306	miR-636	Medium									-0.357506																				-0.374779
MIMAT0003307	miR-637	Medium											0.99781
MIMAT0003308	miR-638	Medium																							-0.695595
MIMAT0003309	miR-639	High															-0.366063						-0.331213
MIMAT0003313	miR-643	Medium																															-0.355614
MIMAT0003317	miR-647	High															-0.999554					-0.950009						-0.829984
MIMAT0003321	miR-651-5p	High							-0.3195																						-0.33106
MIMAT0026624	miR-651-3p	Medium																																-0.999929
MIMAT0022709	miR-652-5p	Medium			-0.45375				-0.370143								-0.339277
MIMAT0003322	miR-652-3p	High			-0.390333												-0.403362														-0.332003		-0.310661
MIMAT0003323	miR-548d-3p	High							-0.312458																						-0.394964		-0.390037
MIMAT0003324	miR-661	Very High																				0.999855
MIMAT0003325	miR-662	Medium																					-0.415544
MIMAT0003327	miR-449b-5p	High		0.742123					-0.815067														-0.910731
MIMAT0003328	miR-653-5p	High															-0.311918							0.374667
MIMAT0026625	miR-653-3p	Medium																											-0.455576				0.328646
MIMAT0003329	miR-411-5p	Medium	-0.306392										0.303499				-0.373543
MIMAT0004813	miR-411-3p	Medium	-0.553105														-0.417168
MIMAT0003330	miR-654-5p	Medium	-0.455216											-0.353652			-0.334483
MIMAT0004814	miR-654-3p	Medium															-0.401913
MIMAT0003331	miR-655-3p	Medium	-0.306634
MIMAT0026627	miR-656-5p	Low								-0.487179													0.649847			-0.495802
MIMAT0003332	miR-656-3p	Medium	-0.562761
MIMAT0003333	miR-549a	Medium																							-0.333271				-0.438795	-0.466749
MIMAT0003337	miR-659-3p	Medium	-0.752754													-0.483837															-0.502937
MIMAT0003338	miR-660-5p	Medium	0.301099				-0.419213		-0.346141				-0.357351
MIMAT0003339	miR-421	Very High					-0.339847		-0.324741																						-0.362554
MIMAT0003879	miR-758-3p	Very High	-0.449394
MIMAT0003880	miR-671-5p	High			-0.423483		-0.339141						-0.363286	-0.311765						-0.376938								-0.344823
MIMAT0004819	miR-671-3p	Medium									-0.326696						-0.335576
MIMAT0003881	miR-668-3p	High														-0.383898
MIMAT0020925	miR-550a-3-5p	Medium																											-0.321337
MIMAT0003882	miR-767-5p	Medium															-0.467344
MIMAT0003883	miR-767-3p	Medium													-0.685856
MIMAT0005459	miR-1224-3p	High																			-0.603244	-0.98409
MIMAT0010214	miR-151b	Medium	0.425506
MIMAT0005792	miR-320b	Very High																						-0.437102							-0.324848
MIMAT0005793	miR-320c	Very High																						-0.374434
MIMAT0005794	miR-1296-5p	High			-0.356019				-0.329697								-0.449892
MIMAT0006789	miR-1468-5p	Medium																																	-0.312479
MIMAT0005795	miR-1323	Medium							-0.380901
MIMAT0005796	miR-1271-5p	Medium															-0.380674
MIMAT0005797	miR-1301-3p	High																													-0.302462
MIMAT0003884	miR-454-5p	Medium							-0.378951																								-0.482556
MIMAT0003885	miR-454-3p	Very High				-0.320167			-0.322095				-0.44063			-0.311135				-0.329949								-0.358059					-0.37633
MIMAT0022713	miR-1185-2-3p	Medium																-0.439329								-0.310243
MIMAT0010251	miR-449c-5p	Medium													-0.906538
MIMAT0013771	miR-449c-3p	High																				-0.999599											-0.99888
MIMAT0005799	miR-1283	Medium									0.523811													0.798609			0.608774		0.989177
MIMAT0003886	miR-769-5p	Medium			-0.448886				-0.325295		-0.439883						-0.380229
MIMAT0003887	miR-769-3p	Medium									-0.309418																				-0.315511
MIMAT0022714	miR-766-5p	Medium																					-0.472568								-0.466293
MIMAT0003888	miR-766-3p	High																															-0.416224
MIMAT0022838	miR-1185-1-3p	Medium																						-0.925483
MIMAT0010313	miR-762	High																				0.998909
MIMAT0004185	miR-802	Medium																												-0.583354
MIMAT0010357	miR-670-5p	Medium												-0.9994												-0.367798						-0.494792
MIMAT0005800	miR-1298-5p	Medium									-0.578301		-0.453687
MIMAT0026641	miR-1298-3p	Low											-0.530714
MIMAT0003945	miR-765	Very High																													-0.301177
MIMAT0003948	miR-770-5p	High													-0.536263
MIMAT0004284	miR-675-5p	Medium																													-0.309468
MIMAT0004902	miR-891a-5p	Medium															-0.319649
MIMAT0026717	miR-891a-3p	Medium																															0.384673
MIMAT0004909	miR-450b-5p	Medium																															-0.348034
MIMAT0004910	miR-450b-3p	Medium																			-0.426617
MIMAT0026718	miR-874-5p	Medium		0.364024
MIMAT0004911	miR-874-3p	Low	0.300114	0.36759																													-0.30411
MIMAT0004913	miR-891b	Medium											-0.525384													-0.344154
MIMAT0004916	miR-888-5p	High																							-0.758256	-0.515918
MIMAT0004918	miR-892b	Medium																								-0.732283
MIMAT0004919	miR-541-5p	Medium																								-0.333801
MIMAT0026719	miR-889-5p	Medium									-0.678418															-0.820708
MIMAT0004922	miR-875-5p	Medium																													-0.677793
MIMAT0004923	miR-875-3p	Very High																					-0.988503
MIMAT0004924	miR-876-5p	High																		-0.328207						-0.353641
MIMAT0004926	miR-708-5p	High																			-0.334004
MIMAT0004928	miR-147b	Medium							-0.313754																						-0.316
MIMAT0004929	miR-190b	High					0.306904																-0.374212
MIMAT0004945	miR-744-5p	Medium			-0.436136						-0.429506																				-0.36406
MIMAT0004946	miR-744-3p	High									-0.352698						-0.545051														-0.312367
MIMAT0004948	miR-885-3p	Medium					-0.435464														-0.682275
MIMAT0004949	miR-877-5p	High					-0.313018																								-0.36689
MIMAT0004950	miR-877-3p	High		-0.302397
MIMAT0026720	miR-887-5p	Medium															-0.611865
MIMAT0004952	miR-665	High												-0.920211	-0.43655
MIMAT0004953	miR-873-5p	Very High			-0.832261				-0.331342						-0.414142														-0.640458
MIMAT0022717	miR-873-3p	Medium							-0.710355																					-0.312778
MIMAT0004955	miR-374b-5p	High							-0.411272
MIMAT0004956	miR-374b-3p	Medium							-0.327784
MIMAT0004958	miR-301b-3p	Very High																													-0.367199		-0.360425
MIMAT0004959	miR-216b-5p	Medium															-0.639395													-0.301436
MIMAT0026721	miR-216b-3p	Medium																	-0.517514							-0.396907
MIMAT0004975	miR-509-3-5p	High			-0.939641																										-0.311993
MIMAT0004977	miR-934	Medium					-0.41216															-0.458766											0.504812
MIMAT0022938	miR-937-5p	Medium				-0.340832
MIMAT0004980	miR-937-3p	Medium									-0.371369																				-0.353107
MIMAT0004981	miR-938	Medium			-0.809251			-0.57058														-0.368212						-0.363716		-0.453778
MIMAT0004982	miR-939-5p	Medium			-0.395948																										-0.309602		-0.34112
MIMAT0022939	miR-939-3p	Medium	-0.981955
MIMAT0004983	miR-940	Very High							-0.341801		-0.457661																				-0.30846		-0.492344
MIMAT0004985	miR-942-5p	High															-0.399592														-0.389802		-0.450447
MIMAT0026734	miR-942-3p	Medium																													-0.304355		-0.486868
MIMAT0004986	miR-943	High																											-0.623227
MIMAT0005823	miR-1178-3p	High																				-0.587911
MIMAT0005824	miR-1179	Medium															-0.438297
MIMAT0026735	miR-1180-5p	Low																			-0.357935
MIMAT0005825	miR-1180-3p	Medium			-0.456037						-0.33518						-0.306913
MIMAT0005826	miR-1181	Medium								-0.353718				-0.698471
MIMAT0005572	miR-1225-5p	Medium																					-0.986021
MIMAT0005573	miR-1225-3p	Medium								-0.415152				-0.919419		-0.31297										-0.439768
MIMAT0005576	miR-1226-5p	Medium								-0.502251								-0.554673
MIMAT0005577	miR-1226-3p	Medium															-0.385838
MIMAT0005580	miR-1227-3p	High																-0.408525						-0.458709							-0.414776
MIMAT0005582	miR-1228-5p	Medium															-0.404969
MIMAT0005583	miR-1228-3p	Medium															-0.382816
MIMAT0022942	miR-1229-5p	Medium																									0.305009							-0.344523
MIMAT0022945	miR-1236-5p	Medium															-0.994345
MIMAT0005591	miR-1236-3p	Medium					-0.351842															-0.379962				0.999279						-0.609799
MIMAT0005592	miR-1237-3p	High																												-0.335521
MIMAT0005593	miR-1238-3p	High									-0.614855
MIMAT0005874	miR-548e-3p	Medium			-0.699609																										-0.305011		-0.371826
MIMAT0026737	miR-548j-3p	Medium											-0.634041						0.615525															-0.837535
MIMAT0005876	miR-1285-3p	Very High					0.30741																							-0.329316
MIMAT0005877	miR-1286	Medium																				-0.321132						-0.840607	0.975451
MIMAT0026738	miR-1287-3p	Medium															-0.302252
MIMAT0005879	miR-1289	Medium				-0.453265																												-0.797998
MIMAT0005880	miR-1290	Medium																										-0.634384
MIMAT0005881	miR-1291	Medium							-0.393094																				-0.406165		-0.301946
MIMAT0005882	miR-548k	High																											-0.382958	-0.405977
MIMAT0005883	miR-1293	Medium																						0.470809					-0.449854
MIMAT0005885	miR-1295a	Medium	-0.466801
MIMAT0005886	miR-1297	Very High																																0.884552
MIMAT0005889	miR-548l	High																								-0.413685
MIMAT0005892	miR-1304-5p	Medium																						-0.360438							-0.340523
MIMAT0005893	miR-1305	Medium																											-0.513654
MIMAT0005894	miR-1243	Very High						-0.300821																				-0.316717
MIMAT0005897	miR-1245a	Medium									-0.35103
MIMAT0022721	miR-1247-3p	Medium	-0.378857
MIMAT0005900	miR-1248	Medium							-0.423476															-0.368415					-0.544854			-0.344207
MIMAT0005901	miR-1249-3p	Medium	0.316035																					-0.368155
MIMAT0005902	miR-1250-5p	High																						-0.336647							-0.388696
MIMAT0026741	miR-1251-3p	Medium																								-0.518937
MIMAT0005905	miR-1254	High																													-0.319472
MIMAT0005906	miR-1255a	Medium																													-0.30138
MIMAT0005907	miR-1256	High						-0.34545
MIMAT0005908	miR-1257	High																			0.42774
MIMAT0005909	miR-1258	Medium																																	0.311491
MIMAT0005916	miR-548n	High									-0.397497																								0.53345
MIMAT0005918	miR-1265	Medium					-0.426686
MIMAT0005919	miR-548o-3p	Medium																											-0.393925				-0.45526		-0.342616
MIMAT0005920	miR-1266-5p	Medium																													-0.357901
MIMAT0026742	miR-1266-3p	Low						-0.318896																						-0.924663		-0.447261
MIMAT0005921	miR-1267	High														-0.972865
MIMAT0005923	miR-1269a	Very High	0.707059																										-0.3228
MIMAT0005924	miR-1270	Medium																					-0.313242	-0.351904
MIMAT0005929	miR-1275	Medium	-0.338364								-0.318682																				-0.376658
MIMAT0005930	miR-1276	Medium																								-0.587059
MIMAT0005933	miR-1277-3p	Medium											-0.310441																				-0.396019
MIMAT0005936	miR-1278	Very High														-0.380363														-0.311966
MIMAT0026743	miR-1288-5p	Low																									0.31704
MIMAT0005942	miR-1288-3p	High															-0.391493																-0.330354
MIMAT0005943	miR-1292-5p	Medium																													-0.409461
MIMAT0022948	miR-1292-3p	Medium																-0.37991												-0.470127	-0.337573				0.607866
MIMAT0005944	miR-1252-5p	Medium																																	-0.950679
MIMAT0026744	miR-1252-3p	Medium									-0.609304
MIMAT0005949	miR-664a-3p	High														-0.302222
MIMAT0022726	miR-1306-5p	Medium															-0.372538
MIMAT0005950	miR-1306-3p	Medium			-0.44531																												-0.330869
MIMAT0022727	miR-1307-5p	Low			-0.418297	-0.349447			-0.352735								-0.523148						-0.320829								-0.36177		-0.496409	-0.320965	-0.317137
MIMAT0005951	miR-1307-3p	Medium				-0.304687					-0.306034																				-0.42865		-0.383763
MIMAT0005788	miR-513b-5p	Medium	0.633922																												-0.453312
MIMAT0026749	miR-513b-3p	Medium																		-0.623449
MIMAT0005789	miR-513c-5p	Medium	0.569064								-0.41621
MIMAT0022728	miR-513c-3p	High											-0.407377								-0.381373						-0.810303					-0.354895
MIMAT0005953	miR-1322	Medium							-0.742408																					-0.824122
MIMAT0005955	miR-1197	Medium																-0.315375				-0.45155				-0.353949			-0.585761
MIMAT0026765	miR-1537-5p	Medium																															-0.338917
MIMAT0007399	miR-1537-3p	Medium								-0.454479																		-0.402836			-0.310951
MIMAT0007400	miR-1538	Medium																															-0.367041
MIMAT0007401	miR-1539	Medium																				-0.663569					-0.81573
MIMAT0006764	miR-320d	Very High																						-0.381556											-0.30713
MIMAT0006765	miR-1825	Medium								-0.677597											-0.691369			-0.970479				-0.745459
MIMAT0007882	miR-1909-5p	High							-0.64752							-0.69008		-0.536632
MIMAT0007884	miR-1910-5p	Medium																											-0.538623		-0.363874
MIMAT0026917	miR-1910-3p	Medium									-0.497433													-0.411564							-0.406156
MIMAT0007885	miR-1911-5p	Medium																					-0.530047
MIMAT0007887	miR-1912	Medium									-0.810128		-0.679664				-0.962714						-0.68176
MIMAT0007888	miR-1913	Medium									-0.471736																				-0.448461
MIMAT0007889	miR-1914-5p	Medium							-0.348728																						-0.301198
MIMAT0007890	miR-1914-3p	Medium																					0.913339					-0.952249							-0.71733
MIMAT0007892	miR-1915-3p	Medium	0.97459
MIMAT0009451	miR-1976	Medium															-0.33745				0.314339
MIMAT0011156	miR-2114-5p	Medium																																	-0.354648
MIMAT0011157	miR-2114-3p	Medium																				-0.359139
MIMAT0011158	miR-2115-5p	High			-0.834734																	-0.3585				-0.466558
MIMAT0011159	miR-2115-3p	Medium			-0.552213																			-0.487745								-0.311056			0.463661
MIMAT0011160	miR-2116-5p	Medium							-0.300421														-0.404698
MIMAT0011161	miR-2116-3p	Medium															-0.538567
MIMAT0011163	miR-548q	Medium							-0.318029
MIMAT0026921	miR-2276-5p	Medium																					0.999792						-0.426874
MIMAT0011775	miR-2276-3p	Medium																						-0.562248				-0.417986
MIMAT0017352	miR-2277-5p	Low			-0.349884																			0.30584
MIMAT0011777	miR-2277-3p	Medium															-0.500845
MIMAT0011778	miR-2278	Medium							-0.307434							-0.434781							-0.549447					-0.389747
MIMAT0013515	miR-2681-5p	Medium									-0.536047					-0.354596					-0.384554											-0.896439
MIMAT0013516	miR-2681-3p	Medium																		-0.333226
MIMAT0013517	miR-2682-5p	Medium							-0.952167																			-0.438701			-0.6211
MIMAT0013518	miR-2682-3p	Medium																-0.542629
MIMAT0012735	miR-718	Medium																				-0.64936
MIMAT0014977	miR-3115	Medium																0.357025												-0.580756	-0.397738
MIMAT0014978	miR-3116	High																				-0.467927
MIMAT0019197	miR-3117-5p	Medium					-0.529634
MIMAT0014979	miR-3117-3p	Medium																																	-0.394477
MIMAT0014981	miR-3119	Very High																												-0.953492
MIMAT0019198	miR-3120-5p	Medium																																	-0.997252
MIMAT0014982	miR-3120-3p	High																0.976867
MIMAT0014983	miR-3121-3p	High														-0.827025	-0.952367									-0.833567
MIMAT0014986	miR-3124-5p	Low																											-0.831228
MIMAT0019200	miR-3124-3p	Medium						-0.328958																		-0.423885					-0.386465
MIMAT0014987	miR-548s	Medium																															-0.311992		-0.301902
MIMAT0014988	miR-3125	Medium															-0.951908				-0.319911										-0.424738				-0.584045
MIMAT0014989	miR-3126-5p	Medium								-0.6108	-0.620131											-0.415416							-0.92281
MIMAT0015377	miR-3126-3p	Medium														-0.361066												-0.408618					-0.32565
MIMAT0014990	miR-3127-5p	High															-0.362943														-0.422833
MIMAT0019201	miR-3127-3p	Medium			-0.679927						-0.367092						-0.542095									-0.330475
MIMAT0014991	miR-3128	Medium																										-0.642066			-0.615577
MIMAT0014992	miR-3129-5p	Medium									-0.32387														-0.527089
MIMAT0014995	miR-3130-5p	Medium											0.388042				-0.40034
MIMAT0014994	miR-3130-3p	Medium																								-0.343549			-0.309293	-0.309169
MIMAT0014996	miR-3131	Medium									-0.301234												-0.685022							-0.372197
MIMAT0014997	miR-3132	High																				-0.41608
MIMAT0014998	miR-3133	Very High																												-0.75995
MIMAT0015001	miR-3135a	Medium																0.414348			-0.459716
MIMAT0015002	miR-466	High																												-0.408197
MIMAT0015003	miR-3136-5p	High															-0.419201																-0.386866
MIMAT0019203	miR-3136-3p	Medium					0.427587															-0.413571				-0.999983
MIMAT0015004	miR-544b	Medium																								-0.507359
MIMAT0015005	miR-3137	Medium						-0.379285	-0.404006										0.435608									-0.717663
MIMAT0015006	miR-3138	Medium							-0.413759							-0.506179
MIMAT0015007	miR-3139	Medium									-0.564954																	-0.777411
MIMAT0019204	miR-3140-5p	Medium		0.999388					-0.718468																						-0.499961
MIMAT0015009	miR-548t-5p	Very High																															-0.474085
MIMAT0015010	miR-3141	Medium											-0.856026
MIMAT0015011	miR-3142	Medium							0.999936												0.975384
MIMAT0015012	miR-3143	High														-0.41617													-0.487945	-0.721421
MIMAT0015013	miR-548u	Medium							-0.873082
MIMAT0015014	miR-3144-5p	Medium												-0.51472						-0.598597
MIMAT0019205	miR-3145-5p	Medium							-0.393455					-0.682411																	-0.324626
MIMAT0015016	miR-3145-3p	High														0.440635															-0.330884
MIMAT0015017	miR-1273c	Medium						-0.988496														-0.606232						-0.984905
MIMAT0015018	miR-3146	Medium							-0.512615								-0.853182									-0.682294					-0.325674
MIMAT0015020	miR-548v	Medium															-0.376896																		-0.30099
MIMAT0015021	miR-3148	High																			0.837034											-0.883995	0.870945
MIMAT0015022	miR-3149	Medium																					-0.73722
MIMAT0019206	miR-3150a-5p	Medium																											-0.356025
MIMAT0015023	miR-3150a-3p	Medium							-0.600833	-0.562378													-0.884148			-0.933171					-0.47135	-0.393784
MIMAT0019207	miR-3152-5p	Medium						-0.31023																-0.818194
MIMAT0015025	miR-3152-3p	Medium						-0.991129																		-0.911166
MIMAT0015026	miR-3153	Medium																												1
MIMAT0019208	miR-3074-5p	Medium			-0.347583
MIMAT0015027	miR-3074-3p	Medium							-0.308407														-0.685815
MIMAT0015028	miR-3154	Medium		0.999189														-0.338601	-0.35757									-0.418096	-0.446923
MIMAT0015029	miR-3155a	Medium													0.485449																		-0.382657
MIMAT0019209	miR-3156-3p	Medium							-0.956227				-0.936058
MIMAT0015031	miR-3157-5p	Medium												-0.374397																					-0.415436
MIMAT0019210	miR-3157-3p	Medium							-0.315671
MIMAT0019211	miR-3158-5p	Medium																													-0.317255
MIMAT0015032	miR-3158-3p	High									-0.302268																		-0.351149
MIMAT0015033	miR-3159	Medium					-0.327201
MIMAT0019212	miR-3160-5p	High					0.554388																								-0.713051
MIMAT0015034	miR-3160-3p	Medium												0.998953
MIMAT0015035	miR-3161	Medium																												-0.436962
MIMAT0015036	miR-3162-5p	Medium																				-0.524784
MIMAT0019213	miR-3162-3p	Medium																										-0.999832
MIMAT0015037	miR-3163	Very High												-0.829519																	-0.545279
MIMAT0015038	miR-3164	High	-0.420621														-0.642661
MIMAT0015039	miR-3165	Medium					0.671275											-0.754817
MIMAT0015040	miR-3166	Medium																													-0.998007
MIMAT0015041	miR-1260b	Medium																					-0.700737					-0.483155
MIMAT0015042	miR-3167	Medium					-0.999986
MIMAT0015043	miR-3168	Medium																														0.998671		-0.482557
MIMAT0015045	miR-3170	Medium																													-0.383055		0.34527
MIMAT0015046	miR-3171	Medium																				-0.472143
MIMAT0019214	miR-3173-5p	Medium																															-0.301031
MIMAT0015048	miR-3173-3p	Medium				0.313197											-0.94318									-0.834744
MIMAT0015049	miR-1193	Medium				-0.381691							-0.372469					-0.387703											-0.963828		-0.614656				0.510617
MIMAT0001630	miR-323b-5p	Medium						-0.775966
MIMAT0015050	miR-323b-3p	Medium															-0.442485
MIMAT0015052	miR-3175	Medium									-0.912771				0.707472							-0.355789										-0.403392
MIMAT0015053	miR-3176	Medium									-0.314003
MIMAT0019215	miR-3177-5p	Medium						-0.63844	-0.588098	-0.462598						-0.947184
MIMAT0015054	miR-3177-3p	Medium																								-0.441045
MIMAT0015055	miR-3178	Medium														-0.581827
MIMAT0015056	miR-3179	Medium																		-0.860368
MIMAT0015061	miR-3181	Medium																																	0.935364
MIMAT0015066	miR-3065-5p	High	0.313942														-0.431406
MIMAT0015067	miR-3186-5p	Medium																															-0.510643	-0.507329
MIMAT0019216	miR-3187-5p	Medium													0.402551									-0.583248
MIMAT0015069	miR-3187-3p	Medium																											-0.344859
MIMAT0015070	miR-3188	Medium			-0.765609						-0.320035
MIMAT0019217	miR-3189-5p	Low																		-0.630484
MIMAT0015071	miR-3189-3p	Medium		-0.543595																							0.818397
MIMAT0015073	miR-3190-5p	Medium									-0.359192																		-0.407797		-0.324998
MIMAT0022839	miR-3190-3p	#N/A							-0.642135																			-0.840752
MIMAT0022732	miR-3191-5p	Medium							-0.308996																			-0.589053
MIMAT0015076	miR-3192-5p	Medium							-0.407249															-0.506742
MIMAT0027027	miR-3192-3p	Medium				-0.495601								-0.997017																			-0.664442
MIMAT0015078	miR-3194-5p	Medium									-0.390457						-0.352072
MIMAT0019218	miR-3194-3p	Medium															-0.328246																		-0.57913
MIMAT0015079	miR-3195	Medium															-0.996691			0.309794
MIMAT0015080	miR-3196	Medium					-0.356486															-0.324955				-0.680451
MIMAT0015081	miR-548x-3p	Medium											-0.360063
MIMAT0015082	miR-3197	Medium																																	-0.827908
MIMAT0015083	miR-3198	Medium														-0.333698						-0.32642
MIMAT0017392	miR-3200-5p	Medium							-0.399562															-0.555206		-0.757293
MIMAT0015085	miR-3200-3p	Medium																													-0.340844
MIMAT0015087	miR-514b-5p	Medium												-0.915256												-0.467859
MIMAT0015088	miR-514b-3p	Medium																			-0.33134												-0.60818
MIMAT0015089	miR-3202	High									-0.571609														0.452848									-0.314967	0.963821
MIMAT0016847	miR-378c	Very High																															-0.343137
MIMAT0016866	miR-4315	Medium																																-0.905855
MIMAT0016873	miR-4322	Medium																	-0.669393			-0.738319								0.997779
MIMAT0016884	miR-4254	Medium																					0.794632
MIMAT0016888	miR-4326	High											-0.306499															-0.344692			-0.339078
MIMAT0016895	miR-2355-5p	Medium	0.31609																														-0.338842
MIMAT0017950	miR-2355-3p	Very High																															-0.422356
MIMAT0016915	miR-4284	Medium	-0.51505						-0.622702				-0.461207				0.999586													-0.620614	-0.520191
MIMAT0016916	miR-4286	Medium																					-0.506424	-0.378479											-0.469597
MIMAT0016925	miR-500b-5p	Medium					-0.381062		-0.368453				-0.414197																-0.314091		-0.354732
MIMAT0017981	miR-3605-5p	Medium							-0.308308																			-0.32809
MIMAT0017982	miR-3605-3p	Medium																															0.306941
MIMAT0017983	miR-3606-5p	Medium								-0.648623	-0.943962
MIMAT0017984	miR-3607-5p	High							-0.305644
MIMAT0017985	miR-3607-3p	Medium															-0.46562										-0.302485
MIMAT0017986	miR-3609	High																										-0.336654		-0.305389
MIMAT0017987	miR-3610	Medium															-0.447674																-0.316949
MIMAT0017988	miR-3611	High																		-0.324836
MIMAT0017989	miR-3612	Medium								-0.998164															0.774647
MIMAT0017990	miR-3613-5p	Medium							-0.464421																	-0.353172	-0.359668		-0.323807	-0.323099	-0.42734		-0.426981
MIMAT0017991	miR-3613-3p	Medium			-0.339178				-0.335021																				-0.528879				-0.3826
MIMAT0017993	miR-3614-3p	Medium															0.404827
MIMAT0017994	miR-3615	Medium																															-0.446271
MIMAT0017996	miR-3616-3p	Medium							-0.465008															-0.973699							-0.325162
MIMAT0017997	miR-3617-5p	High																										-0.427972
MIMAT0022966	miR-3617-3p	Medium															0.920452												-0.481344
MIMAT0019219	miR-3619-3p	Medium	-0.331283																				-0.547044					-0.337997
MIMAT0022967	miR-3620-5p	Medium									-0.558631
MIMAT0018001	miR-3620-3p	High									-0.31615																	-0.334614							0.416644
MIMAT0018003	miR-3622a-5p	Medium																								-0.652609
MIMAT0018004	miR-3622a-3p	Medium			-0.766632			-0.331827																									0.338661
MIMAT0018006	miR-3622b-3p	Medium																						-0.652909		-0.964319
MIMAT0018065	miR-3646	Medium														-0.776249
MIMAT0018070	miR-3650	Medium											-0.437493					-0.924275									-0.999283	-0.39463
MIMAT0018071	miR-3651	High							-0.428407												-0.410557								-0.337705		-0.355837	-0.406912
MIMAT0018072	miR-3652	Medium															-0.375516														-0.353488
MIMAT0018073	miR-3653-3p	Medium															-0.356276
MIMAT0018074	miR-3654	High																							-0.30946	-0.463834
MIMAT0018075	miR-3655	Medium	0.391264																				-0.579839
MIMAT0018077	miR-3657	High																				-0.856686
MIMAT0018080	miR-3659	Medium																				-0.321549		-0.891558				-0.868667
MIMAT0018081	miR-3660	Medium																											-0.506101
MIMAT0018082	miR-3661	Medium	0.706932																			-0.333137												-0.319316
MIMAT0018083	miR-3662	High			-0.648238								-0.316253																				-0.310659
MIMAT0018084	miR-3663-5p	Medium																																	-0.986232
MIMAT0018086	miR-3664-5p	Medium															0.768001						-0.771399
MIMAT0019220	miR-3664-3p	Medium																													-0.318061
MIMAT0018089	miR-3667-5p	Medium			-0.977177									-0.741026																		-0.343916
MIMAT0018090	miR-3667-3p	Medium																										-0.683924	-0.528029	-0.557392
MIMAT0018094	miR-3671	Very High																																-0.999597
MIMAT0018099	miR-3675-3p	Medium																												-0.864606
MIMAT0019221	miR-3677-5p	Medium															-0.479947																-0.395525
MIMAT0018101	miR-3677-3p	Medium			-0.409353						-0.301145						-0.353287																-0.376138
MIMAT0018102	miR-3678-5p	Medium									-0.322468
MIMAT0018103	miR-3678-3p	Medium															-0.327392							-0.791245
MIMAT0018104	miR-3679-5p	Medium							-0.322726						-0.602891											-0.330009					-0.368336
MIMAT0018105	miR-3679-3p	Medium																										-0.35449		-0.394738			-0.315556
MIMAT0018106	miR-3680-5p	Medium			-0.865369																		-0.4909	-0.541532
MIMAT0018107	miR-3680-3p	Medium															-0.320312
MIMAT0018108	miR-3681-5p	Medium			-0.870407												-0.364729
MIMAT0018109	miR-3681-3p	Medium									-0.999644											0.696266
MIMAT0019222	miR-3682-5p	High																															-0.891032
MIMAT0018110	miR-3682-3p	Medium																													-0.341346		-0.433752
MIMAT0018111	miR-3683	Medium														0.999109
MIMAT0018112	miR-3684	Medium																													-0.336402
MIMAT0018113	miR-3685	Medium																-0.497323
MIMAT0018115	miR-3687	Medium			-0.453658																												-0.31425
MIMAT0018116	miR-3688-3p	Very High							-0.465489		-0.320916																			-0.343251
MIMAT0018117	miR-3689a-5p	Medium																-0.619118															-0.990503
MIMAT0018120	miR-3691-5p	Medium			-0.573165
MIMAT0019224	miR-3691-3p	Medium																													-0.556757
MIMAT0018122	miR-3692-3p	High															-0.710902							-0.535337			-0.643788	-0.397091
MIMAT0018183	miR-3909	Medium															-0.453467
MIMAT0018184	miR-3910	Medium																							0.924838
MIMAT0018185	miR-3911	High																										-0.362267
MIMAT0027036	miR-3912-5p	Medium									-0.322237																								0.319442
MIMAT0018186	miR-3912-3p	Medium			-0.413787
MIMAT0018187	miR-3913-5p	Medium			-0.35221												-0.429466
MIMAT0019225	miR-3913-3p	Medium									-0.338195
MIMAT0018188	miR-3914	Medium													-0.872905												-0.916538				-0.475878
MIMAT0018190	miR-3916	Medium														-0.667482														-0.885379
MIMAT0018191	miR-3917	Medium															-0.390844																-0.373832
MIMAT0018192	miR-3918	Medium														-0.437515					-0.699161
MIMAT0018193	miR-3919	Medium						-0.39678																				-0.436653
MIMAT0018194	miR-3150b-3p	Medium															-0.402804
MIMAT0018196	miR-3921	Medium																										-0.342289		-0.49019					0.870597
MIMAT0019227	miR-3922-5p	Medium														-0.557415																-0.40974
MIMAT0018197	miR-3922-3p	High																															-0.468295
MIMAT0018198	miR-3923	High												-0.779826									-0.602222
MIMAT0018199	miR-3924	Medium			-0.99704
MIMAT0018200	miR-3925-5p	Medium																				-0.315868								0.742188		-0.526477
MIMAT0019228	miR-3925-3p	Medium																				-0.843604
MIMAT0018203	miR-676-5p	Medium			-0.609758																										-0.345079
MIMAT0027037	miR-3928-5p	Medium						-0.581943									-0.9985							-0.469184							-0.428358
MIMAT0018205	miR-3928-3p	Medium																						-0.353898
MIMAT0022975	miR-3934-3p	Medium																															-0.319124
MIMAT0018350	miR-3935	Medium					-0.684732															-0.380709
MIMAT0018352	miR-3937	Medium																											-0.353571	-0.460014
MIMAT0018353	miR-3938	Medium		0.706006																								-0.435019		-0.888254
MIMAT0018354	miR-548y	High																											-0.722932				0.337092
MIMAT0018355	miR-3939	Low							-0.37338
MIMAT0019229	miR-3940-5p	Medium															-0.414956														-0.317735		-0.386816
MIMAT0018356	miR-3940-3p	Medium															-0.421523
MIMAT0018358	miR-3942-5p	Medium			-0.415051																												-0.333411
MIMAT0019230	miR-3942-3p	High									-0.467713																				-0.476373
MIMAT0018359	miR-3943	Medium		0.624929																						-0.411435	-0.701737						-0.621172
MIMAT0019231	miR-3944-5p	Medium																						-0.712806
MIMAT0018443	miR-374c-5p	Medium																		-0.382268		-0.593132								-0.763997
MIMAT0022736	miR-642b-5p	Medium														-0.388689														-0.87458
MIMAT0018444	miR-642b-3p	Medium				-0.60865																0.736062				-0.734775
MIMAT0022737	miR-550b-2-5p	High						-0.688751								-0.512735															-0.546996	-0.947675
MIMAT0018445	miR-550b-3p	Medium																						-0.976935
MIMAT0018928	miR-548ab	High	0.999634					-0.809798					0.75015
MIMAT0018932	miR-378f	High									-0.332392
MIMAT0018933	miR-4420	Medium											-0.301005						0.950294			-0.66233
MIMAT0018934	miR-4421	Medium					-0.762368
MIMAT0018935	miR-4422	Medium																										-0.618108
MIMAT0019232	miR-4423-5p	Medium			-0.499492																		-0.703385					-0.303086			-0.391337
MIMAT0018936	miR-4423-3p	Medium																										-0.326666			-0.36244
MIMAT0018937	miR-378g	Medium		-0.703898																							0.502475				-0.348879
MIMAT0018939	miR-4424	Medium																										-0.9979
MIMAT0018940	miR-4425	Medium							-0.408988													-0.34924
MIMAT0018941	miR-4426	Medium									0.820755
MIMAT0018942	miR-4427	High																	0.588234
MIMAT0018943	miR-4428	Medium							-0.962657
MIMAT0018944	miR-4429	High									-0.990023				0.947663						-0.361467
MIMAT0018947	miR-4431	Medium																					0.91615
MIMAT0020956	miR-4433a-5p	Medium									-0.468625
MIMAT0018949	miR-4433a-3p	Medium																								-0.826121
MIMAT0018951	miR-4435	Medium								-0.39843	-0.34058										-0.302409		-0.698444			-0.417658
MIMAT0018952	miR-4436a	Medium						0.998968
MIMAT0018953	miR-4437	Medium						-0.808418																							-0.693099
MIMAT0018960	miR-4442	Medium																															-0.330918
MIMAT0018961	miR-4443	Medium																															-0.306526
MIMAT0018962	miR-4444	Medium			-0.468497																								-0.307935
MIMAT0018963	miR-4445-5p	Medium																0.38375		-0.575883
MIMAT0018964	miR-4445-3p	Medium																														-0.57557
MIMAT0019233	miR-4446-5p	Medium																													-0.572854
MIMAT0018965	miR-4446-3p	Medium									-0.400687							-0.398887												-0.727853					0.512974
MIMAT0018967	miR-4448	Medium																		-0.686999		-0.539658
MIMAT0018968	miR-4449	Medium																														-0.347262
MIMAT0018969	miR-548ag	Medium	0.65587											0.648333					-0.556038									-0.552073			-0.537579
MIMAT0018971	miR-4450	Medium																-0.372855
MIMAT0018972	miR-548ah-5p	High																													-0.754108
MIMAT0018973	miR-4451	Medium																									0.817627
MIMAT0018975	miR-4453	Medium								-0.307447	-0.305866
MIMAT0018979	miR-4457	Medium																		-0.326977
MIMAT0018982	miR-4460	Medium																														-0.999974
MIMAT0018983	miR-4461	Medium							-0.425974																	-0.433535				-0.318759	-0.431	-0.423308
MIMAT0018988	miR-4464	Medium					0.818056
MIMAT0018989	miR-548ai	Medium								-0.37123												-0.528162						-0.367223					-0.357725		-0.442736
MIMAT0018993	miR-4466	Medium			-0.785742																									-0.333701
MIMAT0018994	miR-4467	Medium																	0.568905													-0.619899
MIMAT0018996	miR-4469	Medium												-0.456763										-0.325649						-0.369374
MIMAT0018997	miR-4470	Medium			-0.966666						-0.633994																0.440329
MIMAT0019000	miR-4473	High																															-0.37164
MIMAT0019234	miR-4474-5p	Medium							-0.766695																	-0.905753
MIMAT0019003	miR-4476	Medium																								-0.94495					-0.776583
MIMAT0019005	miR-4477b	Medium																					-0.956172					-0.646039
MIMAT0019006	miR-4478	Medium								0.500766	-0.631043																			-0.766856
MIMAT0019011	miR-4479	Medium																						-0.462294
MIMAT0019013	miR-548ak	High																												-0.983807
MIMAT0019016	miR-4482-5p	Medium			0.880674																										-0.332707
MIMAT0019018	miR-4484	Medium																									0.372865
MIMAT0019021	miR-4487	Medium												-0.66906			-0.418424														-0.493761
MIMAT0019022	miR-4488	Low																								-0.614421
MIMAT0019023	miR-4489	Medium						0.407872
MIMAT0019024	miR-548al	Medium	0.538003
MIMAT0019025	miR-4490	Medium																		-0.755099
MIMAT0019026	miR-4491	Medium			-0.878002												-0.32052
MIMAT0019027	miR-4492	Medium								-0.331083						-0.441315			0.760767												-0.384667
MIMAT0019029	miR-4494	Medium																-0.552354														0.377754
MIMAT0019031	miR-4496	Medium							-0.506266																						-0.388546
MIMAT0019032	miR-4497	Medium																										-0.336777
MIMAT0019033	miR-4498	Medium					-0.360577									0.641821												-0.632878				0.434929
MIMAT0019034	miR-4419b	Medium									-0.678165																					-0.897053
MIMAT0019038	miR-4502	Medium	0.960078				-0.573651						-0.308081
MIMAT0019039	miR-4503	High																												-0.83832
MIMAT0019040	miR-4504	Medium						-0.520488
MIMAT0019041	miR-4505	Medium															-0.470316														-0.369516
MIMAT0019042	miR-4506	High															-0.847099													-0.750774
MIMAT0019048	miR-4511	Medium		0.815561																	-0.32879
MIMAT0019049	miR-4512	Medium														-0.466344
MIMAT0019050	miR-4513	Medium					-0.58486
MIMAT0019052	miR-4515	Medium															-0.385201																-0.395458
MIMAT0019053	miR-4516	Medium																								-0.475769
MIMAT0019054	miR-4517	High																												-0.368249
MIMAT0019055	miR-4518	Medium						-0.676718					-0.451351								-0.723209
MIMAT0019056	miR-4519	Medium																													-0.328369
MIMAT0019057	miR-4520-3p	Medium								-0.823773																					-0.967618
MIMAT0019060	miR-4522	Medium															-0.460464
MIMAT0019061	miR-4523	Medium															-0.524721												-0.348646	-0.364913			-0.315241
MIMAT0019062	miR-4524a-5p	Medium				-0.335631		-0.64149		-0.800125																					-0.559928
MIMAT0019064	miR-4525	Medium						-0.648109																						-0.835735				-0.590026
MIMAT0019065	miR-4526	Medium									-0.876676									-0.5169
MIMAT0019066	miR-4527	Medium																			-0.762262
MIMAT0019067	miR-4528	Medium																0.506407
MIMAT0019068	miR-4529-3p	Medium																										-0.320727
MIMAT0019069	miR-4530	Medium																										0.998019
MIMAT0019071	miR-4532	Medium																	-0.3656
MIMAT0019072	miR-4533	Medium																								-0.567874				-0.374205
MIMAT0019074	miR-378i	High																					-0.623258
MIMAT0019076	miR-548am-3p	Medium																0.360007
MIMAT0019078	miR-4536-5p	Medium																						-0.47009
MIMAT0020959	miR-4536-3p	Medium																					-0.328089
MIMAT0019080	miR-4537	Medium											-0.927749
MIMAT0019081	miR-4538	Medium							-1
MIMAT0022977	miR-4632-5p	Medium							0.901208							0.998594																		-0.779667
MIMAT0019688	miR-4632-3p	Medium																										-0.310616				-0.404575
MIMAT0019691	miR-4634	Medium																								-0.829504
MIMAT0019693	miR-4636	Medium			-0.497837
MIMAT0019694	miR-4637	Medium								0.997057																					-0.557822
MIMAT0019695	miR-4638-5p	Medium							-0.581154
MIMAT0019697	miR-4639-5p	High																				-0.327663					0.48585
MIMAT0019698	miR-4639-3p	Medium																													-0.549096
MIMAT0019701	miR-4641	Medium														-0.71658										-0.559226		-0.43537						-0.429582
MIMAT0019703	miR-4643	Medium																								-0.998962
MIMAT0019706	miR-4645-3p	Medium																													-0.326805
MIMAT0019707	miR-4646-5p	Medium														-0.502944		-0.340815				-0.334939
MIMAT0019708	miR-4646-3p	Medium	0.481351																					-0.67604							-0.340838
MIMAT0019710	miR-4648	Medium							-0.305991													-0.413619						-0.542948
MIMAT0019711	miR-4649-5p	Low														-0.544877					-0.419975										-0.541584				0.995925
MIMAT0019712	miR-4649-3p	Medium																										-0.338689					-0.304242
MIMAT0019713	miR-4650-5p	Medium																														-0.928511
MIMAT0019716	miR-4652-5p	Medium									-0.326556																		-0.366128		-0.324123
MIMAT0019717	miR-4652-3p	High																											-0.530172
MIMAT0019718	miR-4653-5p	Medium									0.999287							0.884119										-0.999715
MIMAT0019721	miR-4655-5p	Low																				-0.372787
MIMAT0019722	miR-4655-3p	Medium																													-0.898013	-0.999928
MIMAT0019724	miR-4657	Medium																											-0.520993
MIMAT0019726	miR-4659a-5p	Medium																			-0.327036
MIMAT0019727	miR-4659a-3p	Medium																			-0.416799													-0.367266
MIMAT0019728	miR-4660	Medium																															-0.343859
MIMAT0019729	miR-4661-5p	Medium																													-0.391638
MIMAT0019730	miR-4661-3p	Medium				-0.589748																								-0.927701
MIMAT0019731	miR-4662a-5p	Medium	0.494899																											-0.345954
MIMAT0019734	miR-4659b-3p	Medium																																-0.902287
MIMAT0019735	miR-4663	Medium																0.957285
MIMAT0019736	miR-4662b	Medium												-0.998701
MIMAT0019737	miR-4664-5p	Medium												-0.608283		-0.326599			0.338903				-0.47925
MIMAT0019738	miR-4664-3p	Medium																												-0.40483
MIMAT0019739	miR-4665-5p	Medium																								-0.390977		-0.351212
MIMAT0019743	miR-4667-5p	Medium																				-0.355056
MIMAT0019744	miR-4667-3p	Medium																													-0.341257
MIMAT0019746	miR-4668-3p	High	0.432723						-0.351199				-0.301358
MIMAT0019747	miR-219b-5p	Medium			-0.558639																			-0.354904
MIMAT0019748	miR-219b-3p	Medium																															-0.319184
MIMAT0019749	miR-4669	Medium																			-0.345084	-0.432761
MIMAT0019750	miR-4670-5p	Medium														-0.999987														-0.50008
MIMAT0019751	miR-4670-3p	High				-0.542832					-0.746598								-0.409048									-0.55287			-0.428217			-0.383926
MIMAT0019752	miR-4671-5p	Medium																															0.999433
MIMAT0019753	miR-4671-3p	Medium					-0.376951								0.876828							0.83439
MIMAT0019754	miR-4672	Medium				-0.803636																										0.698659
MIMAT0019755	miR-4673	Medium	0.998898
MIMAT0019757	miR-4675	Medium																		-0.547054								-0.647385
MIMAT0019758	miR-4676-5p	Medium			-0.478772																												-0.385417
MIMAT0019759	miR-4676-3p	High																															-0.398823
MIMAT0019760	miR-4677-5p	Medium																															-0.365425
MIMAT0019761	miR-4677-3p	Medium																													-0.327217		-0.364579
MIMAT0019762	miR-4678	Medium	-0.442419																			-0.474393						-0.693473	-0.922623			-0.416004
MIMAT0019763	miR-4679	Medium																													-0.378271		-0.309835		-0.921931
MIMAT0019764	miR-4680-5p	Medium																								-0.339925					-0.315604
MIMAT0019765	miR-4680-3p	High						-0.30148												-0.320356				-0.608863				-0.479525							-0.892467
MIMAT0019766	miR-4681	Medium																-0.604705
MIMAT0019767	miR-4682	Medium		0.999654
MIMAT0019768	miR-4683	Medium																											-0.375502
MIMAT0019770	miR-4684-3p	Medium																				-0.616163									-0.456389
MIMAT0019771	miR-4685-5p	Medium		-0.999862																	-0.507865						0.488626
MIMAT0019773	miR-4686	Medium																								-0.998568
MIMAT0019774	miR-4687-5p	Medium																											-0.758171		-0.439589
MIMAT0019775	miR-4687-3p	Medium																												-0.444248	-0.336502
MIMAT0027038	miR-1343-5p	Medium																0.931539
MIMAT0019777	miR-4688	Medium																				-0.655088
MIMAT0019778	miR-4689	Medium													0.89819							-0.42519
MIMAT0019780	miR-4690-3p	Medium	-0.450869
MIMAT0019781	miR-4691-5p	Medium					-0.741362														-0.999429
MIMAT0019782	miR-4691-3p	Medium																						-0.667842
MIMAT0019789	miR-4695-3p	Medium																						-0.644787			-0.513866	-0.953866
MIMAT0019790	miR-4696	Medium																	-0.999954
MIMAT0019792	miR-4697-3p	Medium							-0.423289												-0.477106	-0.46286									-0.36043			0.364804
MIMAT0019796	miR-4700-5p	Medium	0.533217						-0.317364							-0.336352						-0.325116											-0.449347
MIMAT0019797	miR-4700-3p	Medium														-0.492476						-0.539343
MIMAT0019798	miR-4701-5p	Medium																			-0.413037							-0.422571
MIMAT0019802	miR-4703-3p	Medium																								-0.710601
MIMAT0019803	miR-4704-5p	Medium																								-0.687067			-0.724925		-0.878392
MIMAT0019804	miR-4704-3p	Medium																											-0.992117
MIMAT0019805	miR-4705	Medium											-0.574118
MIMAT0019806	miR-4706	Medium				0.479511										-0.923232																		-0.532193
MIMAT0019807	miR-4707-5p	Low																													-0.305424
MIMAT0019808	miR-4707-3p	Low									-0.308302			-0.5078										-0.430802
MIMAT0019809	miR-4708-5p	Medium									-0.75715																				-0.320606
MIMAT0019811	miR-4709-5p	Medium								-0.383038			-0.375071
MIMAT0019813	miR-203b-5p	Medium																-0.878958								-0.828324
MIMAT0019814	miR-203b-3p	Medium	0.305144						-0.32969
MIMAT0019815	miR-4710	Medium																									0.587663
MIMAT0019816	miR-4711-5p	Medium																				-0.998887
MIMAT0019817	miR-4711-3p	Medium						0.909973																								-0.999177
MIMAT0019818	miR-4712-5p	Medium						0.804782					-0.98892														-0.918347
MIMAT0019819	miR-4712-3p	Medium												-0.999505																		-0.889227
MIMAT0019820	miR-4713-5p	Medium																-0.551888
MIMAT0019822	miR-4714-5p	High									-0.461823
MIMAT0019823	miR-4714-3p	Medium			-0.881945
MIMAT0019824	miR-4715-5p	Medium							-0.588234													-0.379707								0.965002
MIMAT0019825	miR-4715-3p	Medium					-0.450893		-0.641233									-0.886764								0.788622
MIMAT0019826	miR-4716-5p	Medium																								-0.919632					-0.513715
MIMAT0019828	miR-3529-5p	Medium																												-0.48383
MIMAT0019829	miR-4717-5p	Medium								-0.815949	0.938208
MIMAT0019830	miR-4717-3p	Medium							-0.319915		-0.537249																				-0.401126
MIMAT0019832	miR-4719	Medium							-0.999222
MIMAT0019833	miR-4720-5p	Medium					-0.463164		-0.99805
MIMAT0019834	miR-4720-3p	Medium																-0.936018													0.958483
MIMAT0019835	miR-4721	Medium																				-0.480994
MIMAT0019836	miR-4722-5p	Medium	-0.892187
MIMAT0019837	miR-4722-3p	Medium																															-0.993005
MIMAT0020300	miR-4520-2-3p	Medium				-0.312087																						-0.750455
MIMAT0019838	miR-4723-5p	Medium																						-0.555078
MIMAT0019839	miR-4723-3p	Medium				-0.377552																									-0.430212
MIMAT0019840	miR-451b	Medium													0.998753
MIMAT0019841	miR-4724-5p	Medium		-0.430569																						-0.339525
MIMAT0019844	miR-4725-3p	Medium																													-0.481201
MIMAT0019845	miR-4726-5p	Medium	-0.686506											-0.571656																	-0.318952
MIMAT0019846	miR-4726-3p	Medium						-0.336239			-0.493612
MIMAT0019847	miR-4727-5p	Medium															-0.532012							-0.362499											-0.719304
MIMAT0019848	miR-4727-3p	Medium		0.999992																	-0.761451
MIMAT0019849	miR-4728-5p	Medium																				-0.344156						-0.412743
MIMAT0019853	miR-4731-5p	Medium									-0.877835					-0.965804										-0.72549
MIMAT0019854	miR-4731-3p	Medium							-0.817612												-0.567316	-0.39953			-0.483471
MIMAT0019855	miR-4732-5p	Medium									-0.38792
MIMAT0019858	miR-4733-3p	Medium																					0.909463								-0.303881
MIMAT0019859	miR-4734	Medium									-0.500765
MIMAT0019860	miR-4735-5p	Medium															-0.999543														-0.470349
MIMAT0019862	miR-4736	Medium			-0.98528												-0.450543						-0.816009
MIMAT0019864	miR-3064-5p	Medium																										-0.30729					-0.311123
MIMAT0019865	miR-3064-3p	Medium		-0.300105	-0.446908
MIMAT0019866	miR-4738-5p	Medium						-0.421064
MIMAT0019868	miR-4739	Medium														-0.377826
MIMAT0019869	miR-4740-5p	Medium												-0.772204														-0.335217
MIMAT0019870	miR-4740-3p	Medium																				-0.759754
MIMAT0019871	miR-4741	Medium																						-0.311814									-0.35152
MIMAT0019872	miR-4742-5p	Medium					-0.530793				-0.728238
MIMAT0019874	miR-4743-5p	Low									-0.59834																		-0.81393		-0.409871
MIMAT0022978	miR-4743-3p	Medium		-0.384219																				-0.73607					-0.888002
MIMAT0019875	miR-4744	Medium						-0.556505									-0.677013
MIMAT0019876	miR-3591-5p	Medium									0.983755																		-0.924642
MIMAT0019877	miR-3591-3p	High																		-0.999714	-0.999905
MIMAT0019878	miR-4745-5p	Medium																																-0.390109
MIMAT0019879	miR-4745-3p	Medium																								-0.375533
MIMAT0019880	miR-4746-5p	Medium																													-0.356909		-0.506975
MIMAT0019883	miR-4747-3p	Medium																				-0.386282						-0.99853
MIMAT0019885	miR-4749-5p	Medium																										-0.413542
MIMAT0019886	miR-4749-3p	Medium								-0.434339																	0.382981	-0.663939
MIMAT0022979	miR-4750-3p	Medium																								-0.884014
MIMAT0019888	miR-4751	Medium		0.534772						-0.634763
MIMAT0019889	miR-4752	Medium	0.354817																												-0.404587
MIMAT0019890	miR-4753-5p	Medium								-0.411784	-0.502201															-0.458221
MIMAT0019891	miR-4753-3p	Medium																										-0.439634		-0.521457
MIMAT0019892	miR-371b-5p	High					0.301664				-0.517602																	-0.497374			-0.386099
MIMAT0019893	miR-371b-3p	Medium							-0.610394	-0.842322																							0.96641
MIMAT0019895	miR-4755-5p	Medium									-0.485163													-0.614702							-0.3444
MIMAT0019896	miR-4755-3p	Medium													0.341105							-0.304569											-0.306255
MIMAT0019897	miR-499b-5p	Medium		0.99898											-0.860021
MIMAT0019898	miR-499b-3p	Medium																																	-0.731894
MIMAT0019899	miR-4756-5p	Medium									-0.977304										0.998785
MIMAT0019901	miR-4757-5p	Medium							-0.428786					-0.778599								-0.322411							-0.78325		-0.378878
MIMAT0019903	miR-4758-5p	Medium																												-0.312007
MIMAT0019904	miR-4758-3p	Low									-0.33233																0.556087			-0.324396
MIMAT0019905	miR-4759	Medium																														0.659
MIMAT0019906	miR-4760-5p	Medium												0.891155
MIMAT0019907	miR-4760-3p	Medium																	-0.885566
MIMAT0019908	miR-4761-5p	Medium																							0.715732
MIMAT0019909	miR-4761-3p	Medium											-0.993002						-0.99982
MIMAT0019910	miR-4762-5p	Medium							-0.367467								-0.444878														-0.325396
MIMAT0019911	miR-4762-3p	High							-0.416534								-0.4178														-0.340456
MIMAT0019913	miR-4763-3p	High																	-0.342278		-0.458966	-0.303449
MIMAT0019914	miR-4764-5p	Medium																-0.364432												-0.946662
MIMAT0019915	miR-4764-3p	Medium				-0.848997
MIMAT0019917	miR-4766-5p	Medium									-0.369591																				-0.422418
MIMAT0019918	miR-4766-3p	Medium			-0.412094				-0.305437														-0.426886										-0.346114
MIMAT0019919	miR-4767	Low														-0.577274							0.935039
MIMAT0019920	miR-4768-5p	Medium																											-0.342304		-0.308925
MIMAT0019922	miR-4769-5p	Medium							0.914986														0.9773
MIMAT0019926	miR-4772-5p	Medium	0.324216
MIMAT0019927	miR-4772-3p	Medium	0.365158																							0.309494			0.384687
MIMAT0019929	miR-4774-5p	Medium																		-0.609745		-0.786069									-0.612248
MIMAT0019931	miR-4775	High																												-0.430062
MIMAT0019933	miR-4776-3p	High																		-0.951695
MIMAT0019934	miR-4777-5p	Medium																		-0.701264
MIMAT0019936	miR-4778-5p	High																														-0.472921
MIMAT0019938	miR-4779	Medium																										-0.823854					-0.489427
MIMAT0019939	miR-4780	Medium			-0.730432																												-0.953398
MIMAT0019941	miR-4436b-3p	Medium									-0.709729
MIMAT0019942	miR-4781-5p	Medium																											-0.621509
MIMAT0019943	miR-4781-3p	Medium												-0.377625
MIMAT0019944	miR-4782-5p	Medium																					-0.556322
MIMAT0019947	miR-4783-3p	Medium														-0.750444						-0.58295
MIMAT0019948	miR-4784	Medium																															-0.346344
MIMAT0019949	miR-4785	Medium							-0.405725																						-0.300013
MIMAT0019950	miR-1245b-5p	Medium								-0.376266																					-0.327469
MIMAT0019952	miR-2467-5p	Medium								-0.664313								-0.526449
MIMAT0019954	miR-4786-5p	Medium															-0.315164						-0.408534
MIMAT0019955	miR-4786-3p	Medium	-0.588479																																0.560499
MIMAT0019956	miR-4787-5p	Medium																	0.377398
MIMAT0019958	miR-4788	Medium																																	0.462679
MIMAT0019960	miR-4789-3p	High							-0.311255		-0.621157							-0.434708																-0.350235
MIMAT0019961	miR-4790-5p	Medium																0.345731							-0.945277									-0.667796
MIMAT0019962	miR-4790-3p	Medium																																-0.775829
MIMAT0019963	miR-4791	Medium															-0.415126																-0.359903
MIMAT0019964	miR-4792	Medium																												-0.746185
MIMAT0019965	miR-4793-5p	Medium						0.974901
MIMAT0019969	miR-4795-3p	Medium								-0.312442												-0.336642
MIMAT0019970	miR-4796-5p	Medium							-0.393486		-0.348816						-0.606148													-0.414257
MIMAT0019971	miR-4796-3p	High									-0.966051
MIMAT0019972	miR-4797-5p	Medium																														-0.755846		-0.726602
MIMAT0019973	miR-4797-3p	Medium																															-0.324993
MIMAT0019974	miR-4798-5p	Medium					-0.499784																							-0.675373
MIMAT0019976	miR-4799-5p	Medium								-0.797945											-0.454427	-0.397975			-0.399297						-0.484153
MIMAT0019978	miR-4800-5p	Medium																											-0.875445		-0.55538
MIMAT0019979	miR-4800-3p	Medium																					-0.499659	-0.419502
MIMAT0019981	miR-4802-5p	Medium							-0.415389																								-0.349169
MIMAT0019985	miR-4804-3p	Medium			-0.827404
MIMAT0021017	miR-4999-5p	Medium															-0.47442
MIMAT0021018	miR-4999-3p	Medium							-0.325611	-0.300923
MIMAT0021019	miR-5000-5p	Medium																				-0.308752									-0.410097
MIMAT0021023	miR-5002-5p	Medium					-0.400995																						0.410745
MIMAT0021024	miR-5002-3p	Medium							-0.578953																			-0.723387			-0.400826
MIMAT0021026	miR-5003-3p	High																					-0.306852
MIMAT0021030	miR-548ao-3p	Medium																	0.975022	-0.661935
MIMAT0021034	miR-5006-3p	Medium																							-0.359987
MIMAT0021039	miR-5008-5p	Medium																	0.896905
MIMAT0021040	miR-5008-3p	Medium		0.769707
MIMAT0021041	miR-5009-5p	Medium		-0.548281										-0.626969														-0.512014					-0.415359
MIMAT0021042	miR-5009-3p	Medium																		-0.820909
MIMAT0021044	miR-5010-3p	High																													-0.301206
MIMAT0020541	miR-5047	High					-0.880187	0.931022
MIMAT0021079	miR-5087	Medium						-0.673968																		-0.953047
MIMAT0021080	miR-5088-5p	Medium																						-0.639874							-0.766458
MIMAT0027041	miR-5088-3p	Medium														-0.750301															-0.474449			-0.455688
MIMAT0021081	miR-5089-5p	Medium	0.785476		-0.967004																					-0.725443
MIMAT0022984	miR-5089-3p	Medium																				-0.682922								-0.906606			-0.958854
MIMAT0021083	miR-5091	Medium															-0.540899																-0.30134
MIMAT0021084	miR-5092	Medium																			-0.50249
MIMAT0021086	miR-5094	Medium																												-0.459812
MIMAT0021117	miR-5187-5p	Medium															-0.478707														-0.303568
MIMAT0021118	miR-5187-3p	Medium							-0.533735															-0.642617
MIMAT0021119	miR-5188	Medium																						-0.484393
MIMAT0027088	miR-5189-3p	Medium		-0.918034							-0.970781														-0.587764			-0.949186
MIMAT0021121	miR-5190	Medium																-0.999669
MIMAT0021122	miR-5191	Medium																												-0.93914
MIMAT0021124	miR-5193	Medium	0.352211
MIMAT0021125	miR-5194	Medium																				-0.607918
MIMAT0021127	miR-5195-3p	Medium											-0.980791																		-0.999994
MIMAT0021129	miR-5196-3p	Medium																													-0.589644
MIMAT0022258	miR-5571-3p	Medium																								-0.467877
MIMAT0022259	miR-5100	Medium																					0.999993	-0.999531
MIMAT0022260	miR-5572	High							-0.99937
MIMAT0022263	miR-548aq-5p	High					-0.482074
MIMAT0022266	miR-548ar-3p	Medium																								-0.6634
MIMAT0022268	miR-548as-3p	High																	-0.551382
MIMAT0022270	miR-5579-3p	Medium																													-0.300578
MIMAT0022272	miR-664b-3p	High			-0.396276																								-0.30298
MIMAT0022273	miR-5580-5p	Medium								-0.897072			-0.937605
MIMAT0022274	miR-5580-3p	Medium																												-0.531658	-0.384015
MIMAT0022275	miR-5581-5p	Medium																				-0.490794									-0.601742
MIMAT0022276	miR-5581-3p	Medium																															-0.30471
MIMAT0022277	miR-548at-5p	Medium																						-0.449703
MIMAT0022280	miR-5582-3p	High									-0.333721																		-0.328257		-0.332069
MIMAT0022281	miR-5583-5p	Medium											-0.955688
MIMAT0022282	miR-5583-3p	Medium																	0.924245
MIMAT0022283	miR-5584-5p	Medium															-0.643483	-0.316763					-0.613185
MIMAT0022284	miR-5584-3p	Medium																				-0.796399
MIMAT0022285	miR-5585-5p	Medium								-0.538484																					-0.450093
MIMAT0022287	miR-5586-5p	Medium	0.404224
MIMAT0022288	miR-5586-3p	Medium																				-0.324852						-0.453053		-0.690116	-0.699944
MIMAT0022289	miR-5587-5p	Medium								0.958849					0.965706
MIMAT0022290	miR-5587-3p	Medium		0.998757
MIMAT0022292	miR-548au-3p	Medium									-0.327666													0.462647									-0.415166
MIMAT0022293	miR-1295b-5p	Medium																									0.393382
MIMAT0022294	miR-1295b-3p	Medium																	0.992622								-0.55673
MIMAT0022295	miR-5588-5p	Medium																													-0.454343
MIMAT0022296	miR-5588-3p	Medium																						-0.496086			0.374713
MIMAT0022297	miR-5589-5p	Medium						-0.890661	-0.351473																						-0.313061
MIMAT0022298	miR-5589-3p	High																								-0.908203
MIMAT0022302	miR-5591-3p	Medium					0.999943
MIMAT0022303	miR-548av-5p	High																										0.679987				0.784674
MIMAT0022468	miR-5680	High			-0.743206
MIMAT0022470	miR-5682	Medium											-0.572006
MIMAT0022474	miR-548ax	Medium												-0.519991	-0.482484														-0.896229
MIMAT0022476	miR-5692c	High																													-0.793116	-0.929976
MIMAT0022478	miR-5687	Medium																										-0.30462
MIMAT0022480	miR-5681b	Medium																												-0.593809
MIMAT0022482	miR-5690	Medium							-0.313205																								-0.378777
MIMAT0022483	miR-5691	Medium						-0.338579									-0.89451												-0.997664
MIMAT0022485	miR-4666b	Medium											-0.850178											-0.995173
MIMAT0022486	miR-5693	Medium																	0.37728								-0.668649				-0.674017
MIMAT0022487	miR-5694	Medium									-0.851436
MIMAT0022488	miR-5695	Medium									-0.440908															-0.443357
MIMAT0022489	miR-5696	High									-0.315175												-0.456976								-0.34304
MIMAT0022490	miR-5697	High									-0.426922											-0.302414		-0.341312		-0.650004
MIMAT0022491	miR-5698	Medium			-0.426787																												-0.376536
MIMAT0027103	miR-5699-5p	Low																											-0.300725		-0.302992
MIMAT0022492	miR-5699-3p	Medium												-0.356631			-0.602126						-0.322137
MIMAT0022494	miR-5701	Medium			-0.997896																						0.668615
MIMAT0022495	miR-5702	Medium													0.986601
MIMAT0022496	miR-5703	Medium	-0.834106														-0.492407
MIMAT0022498	miR-5704	High																														-0.950469
MIMAT0022500	miR-5706	Medium			-0.394818																		-0.366998										-0.309381
MIMAT0024598	miR-6125	Medium																											-0.320505				-0.335526
MIMAT0024613	miR-6129	Medium																				-0.386923								-0.368632	-0.378748
MIMAT0024614	miR-6130	Medium													-0.895243					-0.354323			-0.954147							-0.791021			-0.884597
MIMAT0024615	miR-6131	Medium																																-0.999798
MIMAT0024616	miR-6132	Medium																			-0.826217						0.546878
MIMAT0024618	miR-6134	Medium																								-0.959754		-0.773907					-0.942017
MIMAT0025450	miR-6499-5p	Low					-0.42899				-0.331257
MIMAT0025451	miR-6499-3p	Medium					-0.31887									-0.672126
MIMAT0025453	miR-548ay-3p	Medium															-0.589241
MIMAT0025456	miR-548az-5p	High																													-0.417514
MIMAT0025459	miR-6501-3p	Medium																													-0.332224
MIMAT0025461	miR-6502-3p	Medium																														0.997327
MIMAT0025463	miR-6503-3p	Medium															-0.468763
MIMAT0025464	miR-6504-5p	Medium																										-0.428301
MIMAT0025466	miR-6505-5p	Medium		0.362467				-0.655469																0.750114		-0.936538				-0.678819
MIMAT0025467	miR-6505-3p	Medium							-0.546099
MIMAT0025470	miR-6507-5p	Medium									0.354248
MIMAT0025471	miR-6507-3p	Medium							-0.503679											0.42516													-0.704138
MIMAT0025472	miR-6508-5p	Medium																					-0.410884					-0.388325			-0.36237
MIMAT0025473	miR-6508-3p	Medium																										-0.469561			-0.504922
MIMAT0025474	miR-6509-5p	Medium															-0.344011					-0.31189											-0.458625
MIMAT0025475	miR-6509-3p	Medium																												-0.362799	-0.4136		-0.320279
MIMAT0025477	miR-6510-3p	Low																					-0.304754
MIMAT0025480	miR-6512-5p	Medium					0.63192																							-0.514349
MIMAT0025481	miR-6512-3p	Medium							-0.999978																				-0.998445					-0.476319
MIMAT0025482	miR-6513-5p	Medium												0.779714
MIMAT0025483	miR-6513-3p	Medium									-0.33216
MIMAT0025485	miR-6514-3p	Medium	0.319737
MIMAT0025486	miR-6515-5p	Medium																						-0.423901						-0.396174
MIMAT0025487	miR-6515-3p	Medium													0.851119								-0.891453							0.618443
MIMAT0025841	miR-6715a-3p	Medium												-0.301879		-0.34876
MIMAT0025842	miR-6715b-5p	Medium																-0.720132														0.637855
MIMAT0025843	miR-6715b-3p	Medium			-0.767992								-0.322741																	-0.386747
MIMAT0025846	miR-6717-5p	Medium									-0.495847																		-0.77212
MIMAT0025849	miR-6718-5p	Medium	-0.300182																				-0.317834
MIMAT0027345	miR-6720-5p	Medium					-0.301798				-0.328718					-0.9614											0.979226	-0.303545			-0.508814
MIMAT0025851	miR-6720-3p	Medium					-0.335033
MIMAT0025852	miR-6721-5p	Medium																										-0.540475			-0.386858
MIMAT0025855	miR-6723-5p	Medium	-0.471791																													-0.319495
MIMAT0025857	miR-892c-5p	Medium																							-0.999622
MIMAT0025858	miR-892c-3p	High								-0.335773
MIMAT0027353	miR-6726-5p	Low											0.311054
MIMAT0027354	miR-6726-3p	Medium																																	-0.604254
MIMAT0027355	miR-6727-5p	Low							-0.366667		-0.55038													-0.436126
MIMAT0027357	miR-6728-5p	Low																										-0.355201		-0.370518
MIMAT0027358	miR-6728-3p	Medium																		0.606523
MIMAT0027359	miR-6729-5p	Low		0.860592																		-0.385443
MIMAT0027360	miR-6729-3p	Low																													-0.627788
MIMAT0027361	miR-6730-5p	Medium									-0.356016																								0.533466
MIMAT0027362	miR-6730-3p	Medium														-0.34207												-0.322929	-0.521046		-0.300704
MIMAT0027363	miR-6731-5p	Medium																				-0.357548
MIMAT0027364	miR-6731-3p	Medium															-0.577393
MIMAT0027366	miR-6732-3p	Low									-0.547613															-0.470214
MIMAT0027367	miR-6733-5p	Medium														-0.461598
MIMAT0027368	miR-6733-3p	Low															-0.502294
MIMAT0027370	miR-6734-3p	Medium																														0.795838
MIMAT0027371	miR-6735-5p	Medium																								-0.492236		-0.336251
MIMAT0027372	miR-6735-3p	Medium																				-0.37714
MIMAT0027373	miR-6736-5p	Medium	-0.999989																												-0.357739
MIMAT0027375	miR-6737-5p	Medium									-0.315591				0.384512															-0.344609
MIMAT0027376	miR-6737-3p	Medium						-0.323713			-0.565517												-0.486882							-0.317107
MIMAT0027378	miR-6738-3p	Medium							-0.544008															-0.766911
MIMAT0027380	miR-6739-3p	Medium															-0.996594													-0.406635	-0.315375	-0.369836			-0.427849
MIMAT0027382	miR-6740-3p	Medium														-0.34525												-0.491209
MIMAT0027383	miR-6741-5p	Medium																			-0.344699	-0.354343						-0.758574			-0.739808	-0.656938
MIMAT0027384	miR-6741-3p	Low																										-0.368746
MIMAT0027385	miR-6742-5p	Medium																																-0.964084
MIMAT0027386	miR-6742-3p	Medium																						-0.872928		-0.442271		-0.41428
MIMAT0027388	miR-6743-3p	Medium																													-0.304893
MIMAT0027389	miR-6744-5p	Medium								-0.473705												-0.828325
MIMAT0027390	miR-6744-3p	Low								-0.465355
MIMAT0027391	miR-6745	Medium																																-0.634485
MIMAT0027392	miR-6746-5p	Medium																				-0.376368
MIMAT0027393	miR-6746-3p	Medium		0.352755										-0.967903			-0.620218													-0.314755
MIMAT0027394	miR-6747-5p	Low				-0.515481				-0.654915																		-0.739154					-0.679218
MIMAT0027396	miR-6748-5p	Medium																										-0.397989
MIMAT0027397	miR-6748-3p	Medium									-0.684693					-0.440056												-0.417034			-0.363162
MIMAT0027398	miR-6749-5p	Medium																							-0.449492
MIMAT0027399	miR-6749-3p	Medium		0.634907																							0.322313				-0.385381
MIMAT0027400	miR-6750-5p	Low				-0.526164		-0.655755	-0.633643	-0.468267																		-0.786876
MIMAT0027401	miR-6750-3p	Low									-0.468849													-0.413117					-0.660806	-0.422015	-0.327385
MIMAT0027402	miR-6751-5p	Medium																													-0.390392
MIMAT0027403	miR-6751-3p	Medium																						-0.93026
MIMAT0027405	miR-6752-3p	Low														-0.994264
MIMAT0027406	miR-6753-5p	Low																				-0.416391
MIMAT0027407	miR-6753-3p	Medium																-0.456368													-0.540408
MIMAT0027408	miR-6754-5p	Medium						-0.364895											0.417704												-0.460537
MIMAT0027409	miR-6754-3p	Low		0.502634												-0.339043
MIMAT0027410	miR-6755-5p	Medium		-0.307374
MIMAT0027411	miR-6755-3p	Medium														0.994857											0.910836
MIMAT0027412	miR-6756-5p	Medium																				-0.333895
MIMAT0027413	miR-6756-3p	Medium							-0.682944										-0.389221										-0.841438		-0.471984
MIMAT0027414	miR-6757-5p	Medium							-0.624927							-0.382967
MIMAT0027415	miR-6757-3p	Medium						-0.541308					-0.405114																						-0.770746
MIMAT0027418	miR-6759-5p	Medium																				-0.540734			-0.540642
MIMAT0027419	miR-6759-3p	Medium				0.966244																-0.974489
MIMAT0027420	miR-6760-5p	Medium																0.878724
MIMAT0027422	miR-6761-5p	Medium															-0.338231												-0.41525
MIMAT0027423	miR-6761-3p	Low																				-0.427256						-0.480843			-0.374183
MIMAT0027424	miR-6762-5p	Low							-0.893369
MIMAT0027425	miR-6762-3p	Medium	0.556662														-0.522319												-0.604205
MIMAT0027426	miR-6763-5p	Medium			0.592177						-0.327871																			-0.388979
MIMAT0027427	miR-6763-3p	Low																				-0.686846				-0.914654
MIMAT0027429	miR-6764-3p	Medium														-0.473991															-0.357269
MIMAT0027431	miR-6765-3p	Low																				0.76062					-0.927236						-0.92784
MIMAT0027434	miR-6767-5p	Low								-0.316635							-0.57296				-0.40843
MIMAT0027435	miR-6767-3p	Low								-0.95586												-0.613092										-0.89478
MIMAT0027437	miR-6768-3p	Low																				-0.771734
MIMAT0027439	miR-6769a-3p	Low									-0.45281																	-0.351864	-0.589282
MIMAT0027441	miR-6770-3p	Medium							-0.52483
MIMAT0027445	miR-6772-3p	Medium																										-0.434764
MIMAT0027446	miR-6773-5p	Low						-0.424389						0.84181				-0.361093													-0.373179		-0.460464
MIMAT0027448	miR-6774-5p	Medium																											-0.998212		-0.5659
MIMAT0027449	miR-6774-3p	Low															-0.494627																		-0.731207
MIMAT0027451	miR-6775-3p	Low				-0.310912										-0.630124								-0.407344									-0.866669
MIMAT0027454	miR-6777-5p	Low									-0.419612
MIMAT0027455	miR-6777-3p	Medium									-0.957501
MIMAT0027456	miR-6778-5p	Medium																			-0.984241
MIMAT0027458	miR-6779-5p	Medium	0.469231		-0.769393						-0.428372												-0.632912												-0.554938
MIMAT0027460	miR-6780a-5p	Medium						-0.822215																				-0.934408		-0.652011
MIMAT0027461	miR-6780a-3p	Medium															-0.991178							-0.529501							-0.765266				-0.924786
MIMAT0027462	miR-6781-5p	Low														-0.790687
MIMAT0027463	miR-6781-3p	Low															-0.44909																-0.47801
MIMAT0027464	miR-6782-5p	Medium																				-0.335878
MIMAT0027465	miR-6782-3p	Medium									-0.43324
MIMAT0027468	miR-6784-5p	Medium																													-0.85901
MIMAT0027469	miR-6784-3p	Medium									-0.702564
MIMAT0027470	miR-6785-5p	Medium											-0.45431		0.615764															-0.455931			0.614222	0.383107
MIMAT0027471	miR-6785-3p	Low																				-0.321813					0.537353	-0.670228			-0.638163				-0.813232
MIMAT0027473	miR-6786-3p	Low						-0.395612			-0.511587						-0.925886											-0.659194
MIMAT0027474	miR-6787-5p	Medium																-0.781233								-0.659385	0.772801
MIMAT0027475	miR-6787-3p	Medium			-0.999939		-0.353927									-0.412045
MIMAT0027476	miR-6788-5p	Medium						-0.738775															-0.362764
MIMAT0027478	miR-6789-5p	Low								-0.61101												-0.381042
MIMAT0027479	miR-6789-3p	Low														-0.738282															-0.435179
MIMAT0027481	miR-6790-3p	Medium								-0.86406	-0.982216															0.976367								-0.458927
MIMAT0027485	miR-6792-3p	Medium									0.672763					-0.544983
MIMAT0027487	miR-6793-3p	Medium																									0.543467				-0.419933
MIMAT0027488	miR-6794-5p	Low																																	-0.759955
MIMAT0027490	miR-6795-5p	Medium																				-0.818492
MIMAT0027491	miR-6795-3p	Medium						-0.397155								-0.752444
MIMAT0027492	miR-6796-5p	Medium	-0.99986
MIMAT0027493	miR-6796-3p	Medium											-0.658113									-0.565303
MIMAT0027494	miR-6797-5p	Medium																													-0.693315
MIMAT0027497	miR-6798-3p	Medium															-0.495589														-0.350533
MIMAT0027499	miR-6799-3p	Low		0.640889														-0.542036				-0.407406	-0.970048											-0.394427
MIMAT0027500	miR-6800-5p	Low																	0.580286
MIMAT0027501	miR-6800-3p	Low																				-0.379391									-0.485906
MIMAT0027502	miR-6801-5p	Low									-0.542221							-0.460977		-0.313261										-0.705642		-0.363835
MIMAT0027504	miR-6802-5p	Low												0.951949															-0.841521		-0.374754
MIMAT0027505	miR-6802-3p	Low																						-0.312807					-0.407095
MIMAT0027506	miR-6803-5p	Medium				0.951635																							0.998359
MIMAT0027507	miR-6803-3p	Low			-0.435033												-0.343708											-0.32444	-0.377315
MIMAT0027508	miR-6804-5p	Low									-0.583113					-0.665594															-0.342048
MIMAT0027509	miR-6804-3p	Low															0.707029											-0.57853					-0.545146
MIMAT0027510	miR-6805-5p	Medium			-0.824879																							-0.341936
MIMAT0027511	miR-6805-3p	Medium														-0.955411											-0.780691		-0.984641		-0.814599
MIMAT0027513	miR-6806-3p	Medium															-0.336993
MIMAT0027514	miR-6807-5p	Medium															-0.525882											-0.316105					-0.319933
MIMAT0027518	miR-6809-5p	Low																												-0.516938	-0.97874
MIMAT0027519	miR-6809-3p	Medium		0.798449		-0.391984																-0.308952
MIMAT0027520	miR-6810-5p	Medium		0.999976						-0.504916
MIMAT0027521	miR-6810-3p	Low																											-0.328938
MIMAT0027522	miR-6811-5p	Low																										-0.447178
MIMAT0027523	miR-6811-3p	Medium														0.965214									0.584323			-0.515988
MIMAT0027524	miR-6812-5p	Medium																				-0.511403
MIMAT0027525	miR-6812-3p	Low						-0.303501						-0.913631										-0.504923				-0.776025				-0.64174
MIMAT0027526	miR-6813-5p	Medium																												-0.645527
MIMAT0027527	miR-6813-3p	Low																						-0.359231				-0.399495					-0.310862
MIMAT0027528	miR-6814-5p	Medium																-0.837855
MIMAT0027529	miR-6814-3p	Low																	-0.895952							-0.44491
MIMAT0027530	miR-6815-5p	Low			-0.513718						-0.475282
MIMAT0027533	miR-6816-3p	Medium																				-0.384952
MIMAT0027535	miR-6817-3p	Medium																									0.581971
MIMAT0027536	miR-6818-5p	Medium													0.454321								-0.579181							-0.308984
MIMAT0027538	miR-6819-5p	Medium																													-0.549116	-0.948113
MIMAT0027539	miR-6819-3p	Low				-0.473466																				-0.878906
MIMAT0027540	miR-6820-5p	Low					-0.57529															-0.318345						-0.971916						-0.475592
MIMAT0027542	miR-6821-5p	Low					-0.304505		-0.309389																							-0.313693
MIMAT0027545	miR-6822-3p	Low					0.33438												-0.313322					-0.989752										-0.385804
MIMAT0027546	miR-6823-5p	Low														-0.887167
MIMAT0027547	miR-6823-3p	Medium				-0.554516														0.71731					-0.415367
MIMAT0027549	miR-6824-3p	Medium																										-0.503347		-0.588456	-0.429538
MIMAT0027550	miR-6825-5p	Medium									-0.472896
MIMAT0027551	miR-6825-3p	Low							-0.442565																						-0.393222
MIMAT0027552	miR-6826-5p	Medium																		-0.435343
MIMAT0027553	miR-6826-3p	Medium																						-0.499602					-0.705415
MIMAT0027554	miR-6827-5p	Low																									0.921348
MIMAT0027555	miR-6827-3p	Medium																				-0.379603						-0.45631
MIMAT0027558	miR-6829-5p	Low																				-0.471318
MIMAT0027559	miR-6829-3p	Medium											0.644633																				-0.980072
MIMAT0027561	miR-6830-3p	Medium							-0.916679	-0.64663					-0.639704	-0.643812						-0.344166
MIMAT0027562	miR-6831-5p	Medium														-0.667497							-0.999806
MIMAT0027564	miR-6832-5p	Medium																	0.390952
MIMAT0027566	miR-6833-5p	Medium																				-0.499427								-0.957498
MIMAT0027567	miR-6833-3p	Medium																											-0.498677
MIMAT0027568	miR-6834-5p	Medium																												-0.34369
MIMAT0027569	miR-6834-3p	Low					0.761805
MIMAT0027570	miR-6835-5p	Medium																			0.804246
MIMAT0027572	miR-6780b-5p	Medium																								-0.759511
MIMAT0027573	miR-6780b-3p	Medium														-0.312894												-0.538016
MIMAT0027574	miR-6836-5p	Medium					0.383804																											-0.338055
MIMAT0027575	miR-6836-3p	Low									-0.800018
MIMAT0027576	miR-6837-5p	Low																								-0.337412
MIMAT0027577	miR-6837-3p	Medium	0.321501														-0.374888
MIMAT0027578	miR-6838-5p	Medium																	-0.999779
MIMAT0027579	miR-6838-3p	Low							-0.335825	-0.416684												-0.34229					0.415818	-0.383817					-0.371798
MIMAT0027580	miR-6839-5p	Medium															-0.483236											-0.502825			-0.32311
MIMAT0027581	miR-6839-3p	Medium								-0.965823												-0.990081
MIMAT0027582	miR-6840-5p	Medium															-0.910862	-0.510163
MIMAT0027583	miR-6840-3p	Medium																															-0.658618
MIMAT0027584	miR-6841-5p	Medium		0.93326																										-0.742013
MIMAT0027585	miR-6841-3p	Low																									0.463761
MIMAT0027586	miR-6842-5p	Low		0.999967																						0.554735			-0.942472		-0.639456
MIMAT0027587	miR-6842-3p	Medium															-0.449257																-0.320202
MIMAT0027588	miR-6843-3p	Medium												-0.424691
MIMAT0027589	miR-6844	Medium																													-0.326752
MIMAT0027590	miR-6845-5p	Low														-0.488558															-0.757945
[truncated: 129 more rows]

## Sheet: Table S8
Table S8. Correlation analysis between IL6R Exon 2 expression and expression levels of all miRNAs included in TCGA datasets. The miRNAs showing Pearson’s r ≥ 0.3 or ≤ -0.3 , p≤0.05 are reported
[truncated: 1,871 more rows]

[truncated: 2 more sheets:  Table S9, Table S10]
